# Supplementary material for: Reduced stress-associated FKBP5 DNA methylation together with gut microbiota dysbiosis is linked with the progression of obese PCOS patients
Source: PubMed Central journal article supplement (PMC8282850; doi:10.1038/s41522-021-00231-6), 2021-07-15
Supplement: 41522_2021_231_MOESM1_ESM.pdf [file 41522_2021_231_MOESM1_ESM.pdf]

## **Reduced stress-associated FKBP5 DNA methylation together with gut microbiota dysbiosis is linked with the progression of obese PCOS patients**

Fu Chen<sup>1\*</sup>, Zhangran Chen<sup>2\*</sup>, Minjie Chen<sup>3,4</sup>, Guishan Chen<sup>3</sup>, Qingxia Huang<sup>3</sup>, Xiaoping Yang<sup>3</sup>, Huihuang Yin<sup>3,4</sup>, Lan Chen<sup>3</sup>, Weichun Zhang<sup>3</sup>, Hong Lin<sup>5</sup>, Miaoqiong Ou<sup>1</sup>, Luanhong Wang<sup>6</sup>, Yongsong Chen<sup>3</sup>, Chujia Lin<sup>3</sup>, Wencan Xu<sup>3</sup>, Guoshu Yin<sup>3#</sup>

<sup>1</sup>Department of Clinical Nutrition, The First Affiliated Hospital of Shantou University Medical College, Shantou, Guangdong Province, China. 515041

<sup>2</sup>Institute for Microbial Ecology, School of Medicine, Xiamen University, Xiamen, China

<sup>3</sup>Department of Endocrinology, the First Affiliated Hospital of Shantou University Medical College, Shantou, Guangdong Province, China. 515041

<sup>4</sup>Laboratory of Molecular Cardiology and Laboratory of Molecular Imaging, the First Affiliated Hospital of Shantou University Medical College, Shantou, Guangdong Province, China. 515041

<sup>5</sup>Department of Department of Reproductive Center, the First Affiliated Hospital of Shantou University Medical College, Shantou, Guangdong Province, China. 515041

<sup>6</sup>Department of Gynecological tumor, Tumor Hospital Affiliated to Shantou University Medical College, Guangdong Province, China. 515031

\*Fu Chen and Zhangran Chen contributed to this study equally.

### **Correspondence Author**

#Guoshu Yin, Email: yinguoshu@126.com.

# Supplemental Figures

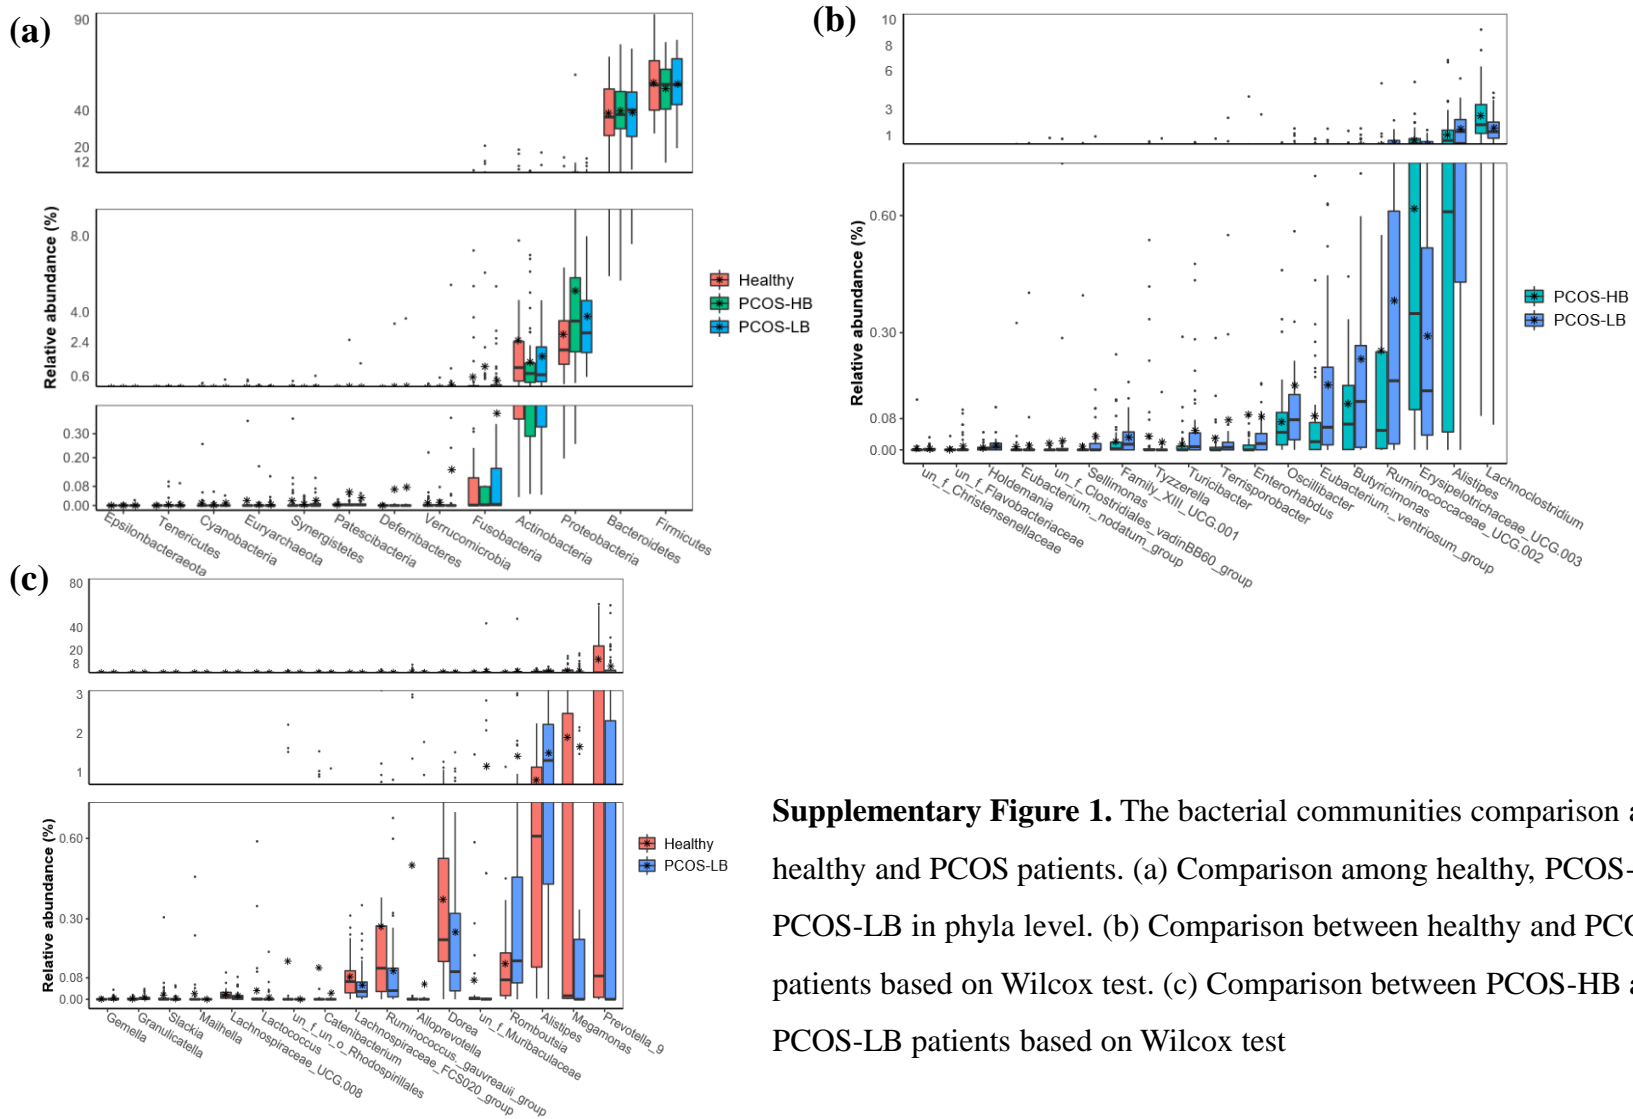

**Supplementary Figure 1.** The bacterial communities comparison among healthy and PCOS patients. (a) Comparison among healthy, PCOS-HB and PCOS-LB in phyla level. (b) Comparison between healthy and PCOS-LB patients based on Wilcoxon test. (c) Comparison between PCOS-HB and PCOS-LB patients based on Wilcoxon test

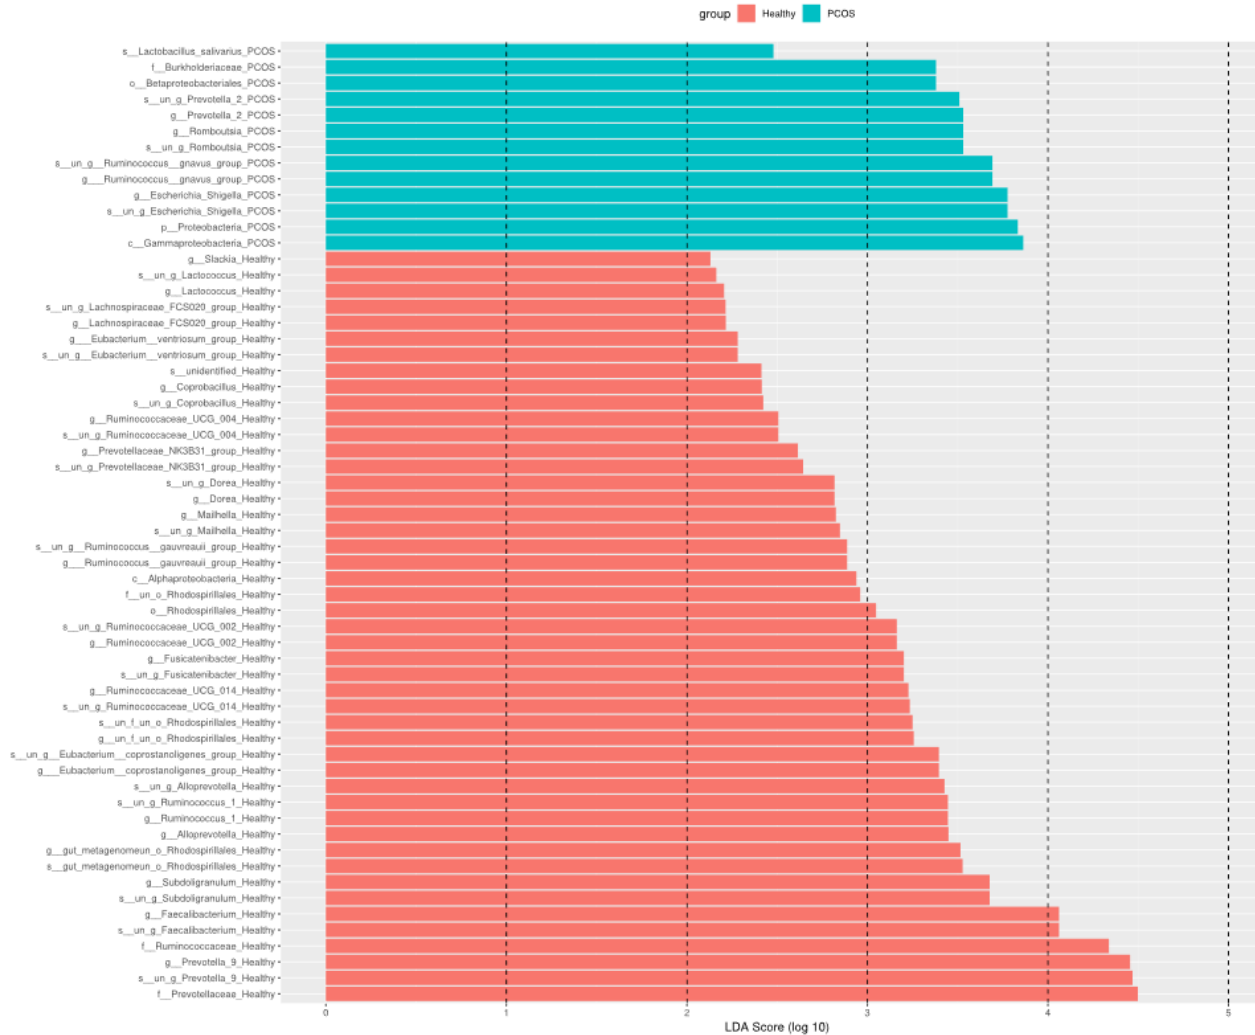

**Supplementary Figure 2.** Reveal of characteristic bacterial taxa based on LDA Effect Size (LEfSe) analysis

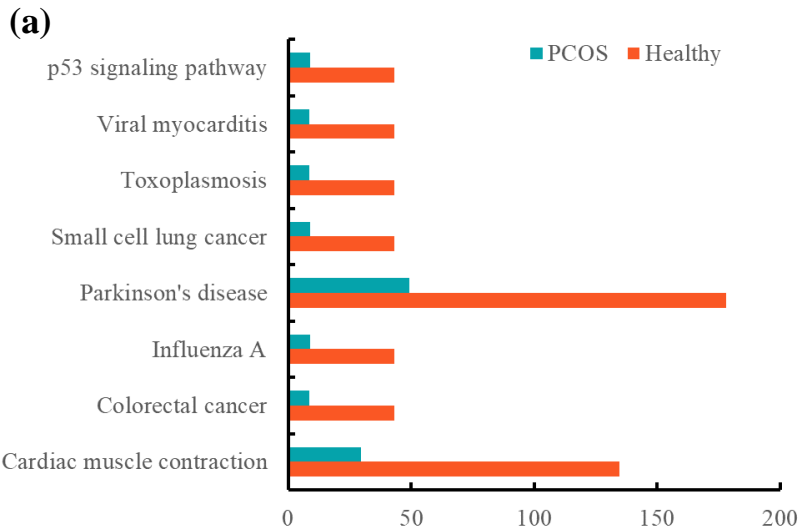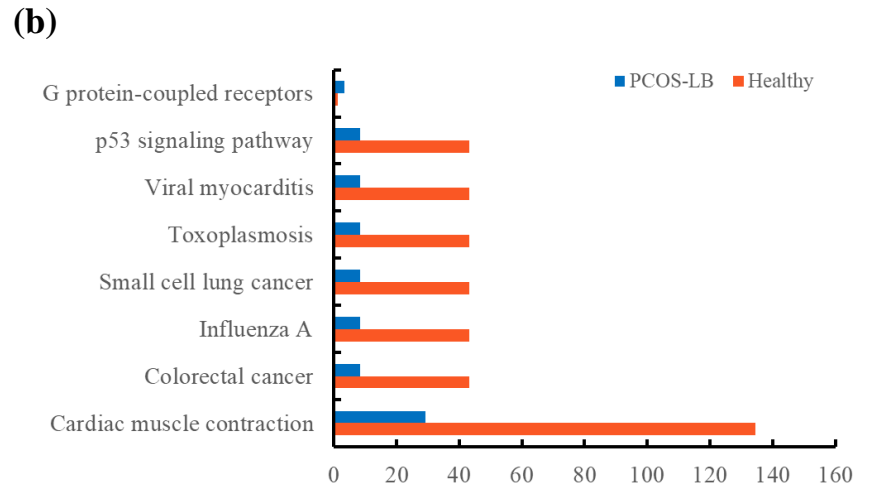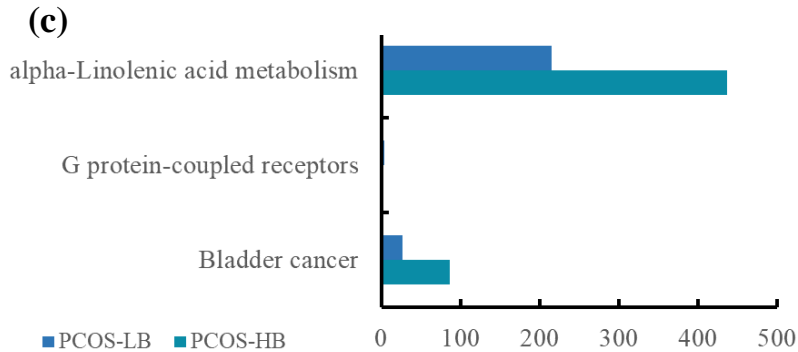

**Supplementary Figure 3.** The predicted pathway comparison among healthy and PCOS patients. (a) Comparison between healthy and PCOS. (b) Comparison between healthy and PCOS-LB patients. (c) Comparison between PCOS-HB and PCOS-LB patients

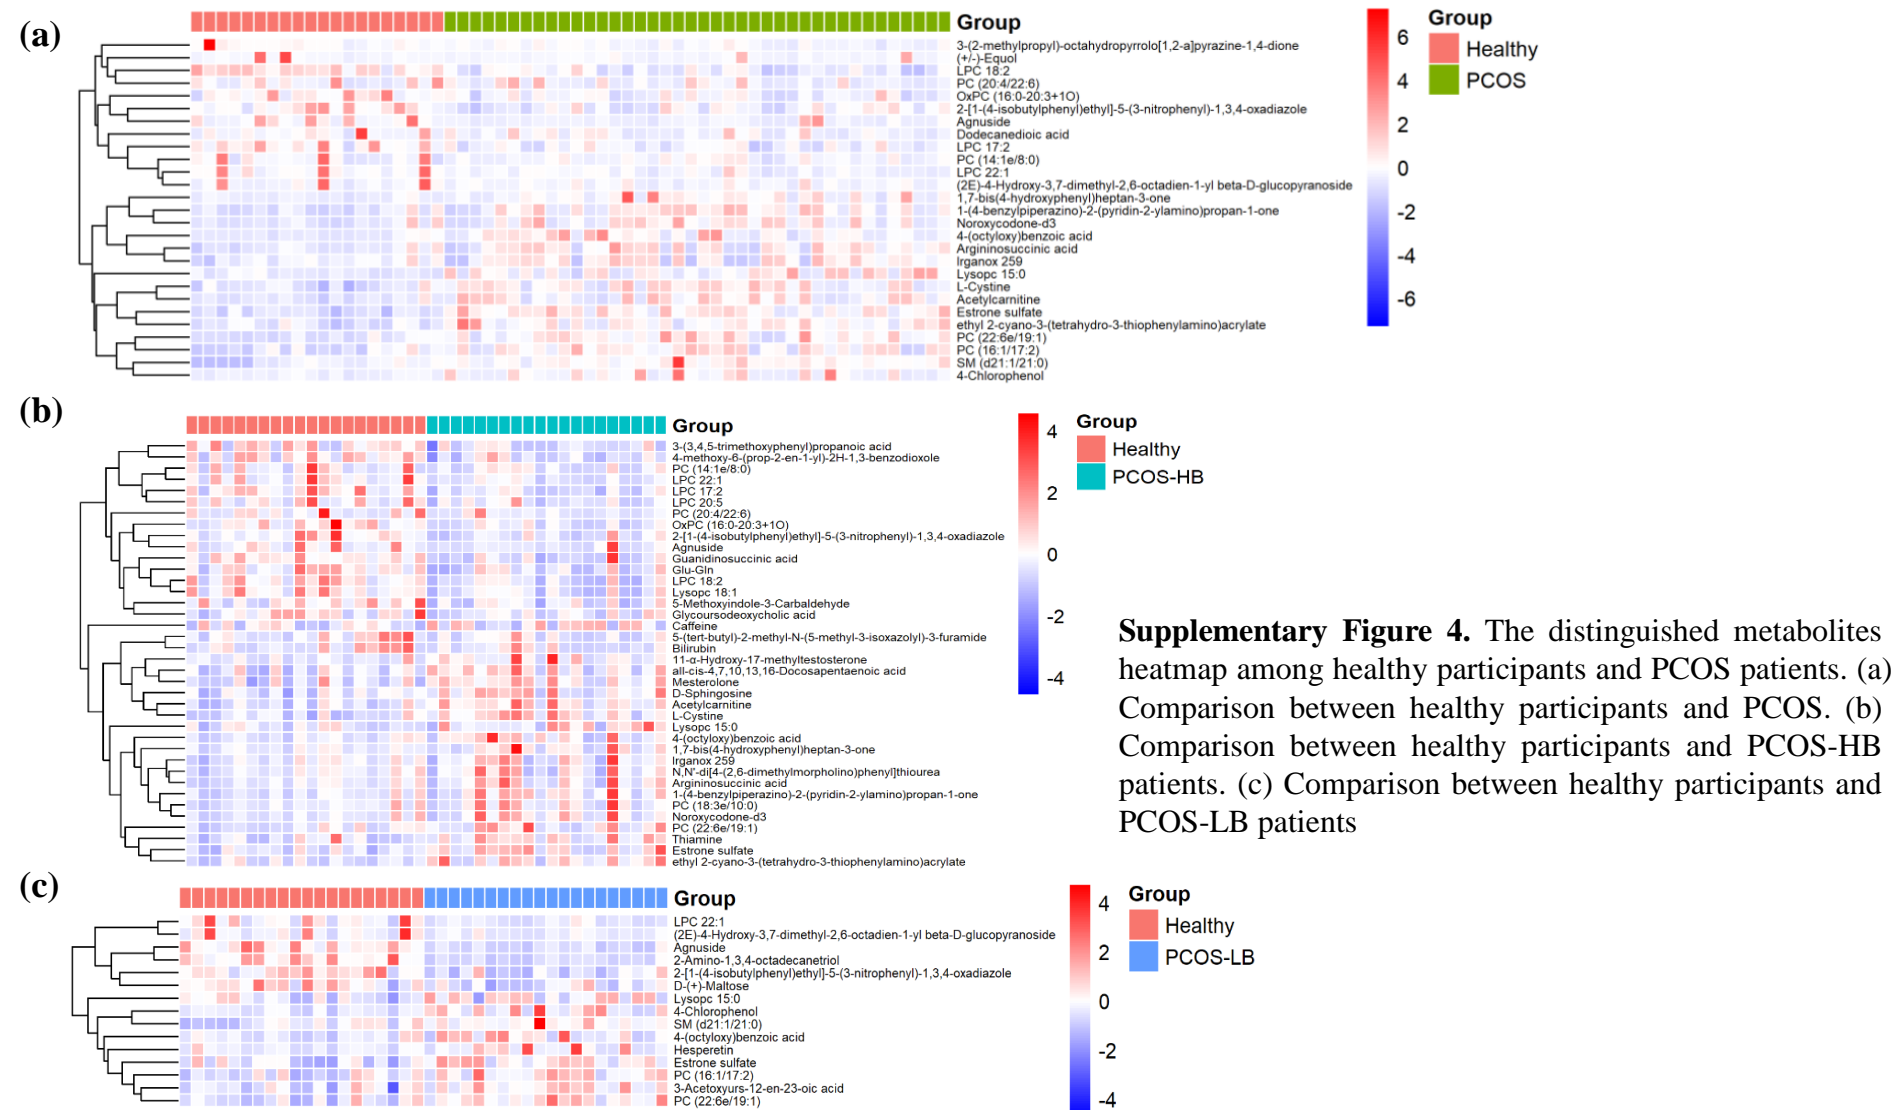



**Supplementary Table 1** All primers used in this study

| Primer       | Sequence                              |
|--------------|---------------------------------------|
| FKBP5-F      | 5'-TTGGTTAGGTTAGTTTTAGGAAGTAAT-3'     |
| FKBP5-R-biot | 5'-ACCAAAAAAAAAATATAATCTTTACAATCAC-3' |
| FKBP5-S      | 5'-AAGTAATTTTATTAAGTTTAAGATG-3'       |
| 16S Forward  | 5'-CCTACGGRRBGCASCAGKVRVGAAT-3'       |
| 16S Reverse  | 5'-GGACTACNVGGGTWTCTAATCC-3'          |

**Supplementary Table 2** Sequence process information about PCOS patients and healthy individuals

| sample | RawReads | CleanReads | Chimerta_check | OTUseqs | OTUs |
|--------|----------|------------|----------------|---------|------|
| N1     | 60728    | 60236      | 50381          | 49758   | 235  |
| N2     | 53766    | 53043      | 48362          | 47993   | 304  |
| N3     | 64144    | 63563      | 52604          | 52133   | 284  |
| N4     | 47953    | 47488      | 38800          | 38548   | 276  |
| N5     | 74329    | 73595      | 61483          | 60378   | 183  |
| N6     | 79453    | 78691      | 69430          | 69202   | 150  |
| N7     | 63922    | 63273      | 57654          | 57475   | 259  |
| N8     | 46677    | 46279      | 39071          | 37782   | 271  |
| N10    | 79831    | 79160      | 70872          | 70080   | 276  |
| N11    | 79365    | 78279      | 72885          | 72404   | 323  |
| N12    | 63957    | 63077      | 55257          | 54778   | 225  |
| N14    | 100238   | 98787      | 83717          | 83307   | 271  |
| N15    | 88085    | 87338      | 72052          | 69116   | 277  |
| N16    | 64363    | 63708      | 55166          | 55005   | 232  |
| N17    | 60300    | 59768      | 50352          | 49628   | 293  |
| N18    | 43976    | 43462      | 39762          | 39677   | 254  |
| N19    | 61260    | 60502      | 56334          | 55914   | 278  |
| N20    | 41042    | 40766      | 35079          | 34804   | 196  |
| N21    | 108354   | 107454     | 97018          | 96595   | 282  |
| N22    | 93267    | 92471      | 84032          | 83159   | 216  |
| N23    | 45095    | 44719      | 39535          | 38738   | 186  |
| N24    | 62916    | 62415      | 52162          | 48983   | 162  |
| N26    | 57159    | 56587      | 50299          | 50186   | 255  |
| N27    | 77341    | 76700      | 65207          | 63897   | 206  |
| N28    | 57060    | 56514      | 50159          | 49984   | 207  |
| N29    | 36666    | 36332      | 31499          | 31080   | 248  |
| N30    | 65593    | 65091      | 58491          | 57939   | 201  |



|      |       |       |       |       |     |
|------|-------|-------|-------|-------|-----|
| N31  | 59493 | 59014 | 51098 | 50671 | 262 |
| N32  | 69313 | 68722 | 60112 | 59848 | 223 |
| N33  | 57886 | 57191 | 52841 | 52711 | 258 |
| N34  | 43979 | 43552 | 37377 | 36750 | 235 |
| N35  | 59271 | 58702 | 56084 | 55950 | 277 |
| N36  | 52803 | 52278 | 45736 | 45291 | 214 |
| N37  | 58743 | 57992 | 54607 | 54245 | 280 |
| N38  | 65296 | 64779 | 51546 | 51078 | 245 |
| N39  | 66358 | 65745 | 54682 | 53671 | 284 |
| N40  | 77675 | 76896 | 64314 | 63271 | 257 |
| N41  | 77745 | 76890 | 60865 | 58463 | 296 |
| P001 | 60603 | 59622 | 54599 | 48047 | 236 |
| P002 | 51546 | 50460 | 44964 | 43218 | 155 |
| P003 | 43392 | 42892 | 40243 | 39552 | 183 |
| P004 | 57626 | 56766 | 51027 | 51018 | 136 |
| P005 | 62700 | 59702 | 53123 | 53056 | 219 |
| P006 | 82465 | 81694 | 75214 | 74520 | 306 |
| P007 | 72566 | 71701 | 67717 | 67646 | 166 |
| P008 | 59863 | 59473 | 53713 | 53105 | 172 |
| P009 | 65286 | 64665 | 55764 | 54636 | 300 |
| P010 | 57053 | 56483 | 52095 | 52000 | 123 |
| P012 | 76360 | 72793 | 56255 | 55750 | 176 |
| P013 | 69607 | 68965 | 64075 | 62524 | 240 |
| P014 | 60066 | 59463 | 56090 | 54952 | 277 |
| P015 | 86286 | 84579 | 74737 | 72142 | 268 |
| P016 | 89937 | 88164 | 75483 | 75033 | 232 |
| P017 | 91151 | 89204 | 75339 | 73853 | 307 |
| P018 | 66183 | 64285 | 54818 | 54121 | 194 |
| P019 | 88241 | 86188 | 69596 | 69100 | 314 |

|      |        |        |        |        |     |
|------|--------|--------|--------|--------|-----|
| P020 | 87471  | 85601  | 73019  | 72270  | 246 |
| P021 | 78898  | 77327  | 66436  | 65881  | 284 |
| P022 | 78570  | 77902  | 69936  | 69355  | 274 |
| P023 | 99708  | 98174  | 90082  | 83421  | 247 |
| P024 | 81761  | 80481  | 75685  | 73869  | 227 |
| P025 | 130218 | 128246 | 112565 | 110405 | 145 |
| P026 | 70586  | 66733  | 58496  | 58048  | 102 |
| P027 | 69325  | 67623  | 62158  | 61983  | 168 |
| P028 | 94935  | 93443  | 84646  | 84024  | 255 |
| P030 | 109095 | 107943 | 101887 | 102074 | 171 |
| P031 | 135710 | 134077 | 116505 | 115493 | 270 |
| P033 | 94714  | 93011  | 82712  | 82691  | 213 |
| P034 | 89332  | 85341  | 75639  | 75588  | 156 |
| P035 | 76044  | 74845  | 67907  | 67436  | 288 |
| P036 | 58991  | 58242  | 54888  | 54602  | 224 |
| P037 | 87183  | 86007  | 65747  | 64826  | 259 |
| P038 | 75692  | 74905  | 66890  | 66376  | 285 |
| P039 | 54060  | 53122  | 45924  | 45898  | 171 |
| P040 | 67342  | 66515  | 59960  | 58562  | 208 |
| P041 | 81333  | 79472  | 72633  | 71415  | 244 |
| P042 | 40173  | 39515  | 35342  | 35270  | 204 |
| P043 | 59875  | 59477  | 55598  | 55334  | 247 |
| P044 | 63768  | 62331  | 54688  | 54583  | 248 |
| P045 | 109309 | 107627 | 99105  | 98939  | 234 |
| P046 | 58101  | 56993  | 52103  | 52005  | 141 |
| P047 | 85414  | 84026  | 71952  | 71967  | 128 |
| P048 | 49516  | 49060  | 44246  | 43997  | 270 |
| P049 | 60840  | 59583  | 53438  | 53323  | 236 |
| P050 | 58283  | 57983  | 57152  | 57158  | 83  |

|      |        |        |       |       |     |
|------|--------|--------|-------|-------|-----|
| P051 | 46348  | 45805  | 42199 | 42112 | 201 |
| P052 | 69290  | 68275  | 58779 | 57196 | 193 |
| P053 | 100418 | 99371  | 88284 | 87801 | 179 |
| P054 | 55838  | 54558  | 49926 | 49921 | 200 |
| P056 | 110680 | 109129 | 99423 | 98440 | 224 |
| P057 | 52525  | 51830  | 48044 | 46038 | 201 |
| P058 | 76064  | 74824  | 61901 | 60973 | 187 |
| P059 | 63078  | 62294  | 58026 | 56996 | 256 |
| P060 | 62548  | 61671  | 57360 | 56894 | 248 |
| P061 | 72575  | 71096  | 58297 | 57928 | 219 |
| P062 | 67812  | 66460  | 53505 | 52478 | 289 |
| P063 | 91879  | 90988  | 70550 | 70164 | 236 |
| P064 | 64723  | 63616  | 49316 | 48974 | 264 |
| P065 | 73101  | 70624  | 59086 | 59135 | 104 |
| P066 | 51670  | 51124  | 45610 | 45467 | 191 |
| P067 | 63195  | 62551  | 51780 | 51263 | 148 |
| P068 | 74976  | 74343  | 62469 | 62080 | 218 |
| P069 | 64419  | 63688  | 60109 | 60016 | 224 |
| P070 | 64562  | 63950  | 56084 | 55802 | 186 |
| P071 | 57952  | 57070  | 50263 | 50097 | 251 |
| P072 | 55254  | 54683  | 47521 | 47259 | 236 |
| P073 | 79629  | 78488  | 66471 | 66107 | 165 |
| P074 | 57856  | 57275  | 47027 | 46745 | 227 |
| P075 | 48837  | 48385  | 39419 | 37598 | 220 |
| P076 | 62873  | 62200  | 57146 | 57081 | 220 |
| P077 | 60491  | 59941  | 51039 | 49720 | 240 |
| P078 | 75512  | 74882  | 63491 | 63077 | 301 |
| P079 | 76030  | 75337  | 61303 | 60837 | 294 |
| P080 | 52943  | 52497  | 44792 | 43705 | 244 |

|      |       |       |       |       |     |
|------|-------|-------|-------|-------|-----|
| P081 | 67360 | 65584 | 62534 | 61703 | 246 |
| P082 | 65204 | 64733 | 55625 | 53247 | 167 |
| P083 | 75214 | 74595 | 62756 | 62540 | 221 |
| P084 | 76606 | 75795 | 66936 | 66855 | 198 |
| P085 | 62480 | 61830 | 52660 | 52522 | 197 |
| P086 | 61056 | 60479 | 51698 | 48856 | 259 |
| P087 | 69699 | 68966 | 64532 | 64489 | 190 |
| P088 | 63047 | 62418 | 55799 | 55685 | 226 |
| P089 | 63978 | 63415 | 55375 | 55074 | 222 |
| P090 | 70883 | 70206 | 60702 | 60463 | 298 |
| P092 | 80025 | 79302 | 71312 | 70268 | 296 |
| P093 | 68841 | 68126 | 57673 | 57031 | 221 |
| P094 | 72012 | 71330 | 63786 | 63650 | 207 |
| P095 | 54436 | 53931 | 48302 | 48264 | 176 |
| P096 | 63228 | 62408 | 57606 | 57456 | 201 |
| P097 | 74092 | 73472 | 65592 | 65112 | 236 |
| P099 | 52041 | 51600 | 46581 | 45598 | 250 |
| P100 | 59783 | 59150 | 52898 | 52260 | 213 |
| P101 | 69905 | 69186 | 63695 | 62961 | 268 |
| P102 | 67300 | 66793 | 61212 | 61056 | 225 |
| P103 | 68755 | 68203 | 58092 | 57938 | 212 |
| P104 | 63956 | 63492 | 58095 | 57544 | 153 |

---

**Supplementary Table 3** Bacterial diversity among PCOS patients and healthy individuals

| sample | Group   | Observe | Chao1   | ACE     | Shannon | Simpson | J       |
|--------|---------|---------|---------|---------|---------|---------|---------|
| N1     | Healthy | 210     | 248.154 | 236.246 | 3.62963 | 0.94912 | 0.6788  |
| N2     | Healthy | 285     | 312.774 | 317.849 | 4.19086 | 0.97301 | 0.74142 |
| N3     | Healthy | 270     | 323.04  | 314.833 | 2.92546 | 0.80639 | 0.52255 |
| N4     | Healthy | 269     | 305.964 | 309.756 | 3.48794 | 0.92234 | 0.62343 |
| N5     | Healthy | 165     | 213.462 | 211.159 | 3.42058 | 0.9348  | 0.66992 |
| N6     | Healthy | 128     | 171.5   | 164.685 | 3.03    | 0.9091  | 0.62448 |
| N7     | Healthy | 225     | 281.438 | 265.206 | 3.60898 | 0.93859 | 0.66634 |
| N8     | Healthy | 260     | 277.4   | 280.042 | 3.76349 | 0.942   | 0.6768  |
| N10    | Healthy | 230     | 273.333 | 267.221 | 3.75815 | 0.95201 | 0.69108 |
| N11    | Healthy | 292     | 309.826 | 325.693 | 4.18375 | 0.97059 | 0.737   |
| N12    | Healthy | 203     | 266.588 | 257.085 | 3.20625 | 0.90794 | 0.60345 |
| N14    | Healthy | 209     | 252.75  | 268.472 | 3.02925 | 0.90121 | 0.56703 |
| N15    | Healthy | 249     | 318.176 | 295.781 | 3.55646 | 0.92192 | 0.64458 |
| N16    | Healthy | 212     | 261.583 | 238.41  | 3.00854 | 0.8746  | 0.56165 |
| N17    | Healthy | 262     | 309     | 306.438 | 3.675   | 0.93132 | 0.65998 |
| N18    | Healthy | 245     | 296     | 286.228 | 2.99655 | 0.87626 | 0.5447  |
| N19    | Healthy | 258     | 328.5   | 303.3   | 3.72563 | 0.92585 | 0.67093 |
| N20    | Healthy | 195     | 269.1   | 235.514 | 3.59911 | 0.95076 | 0.68255 |
| N21    | Healthy | 249     | 259.833 | 264.509 | 3.76821 | 0.9455  | 0.68296 |
| N22    | Healthy | 187     | 233.75  | 217.202 | 3.36643 | 0.93707 | 0.64354 |
| N23    | Healthy | 179     | 194.615 | 204.283 | 2.83667 | 0.87129 | 0.54684 |
| N24    | Healthy | 148     | 206     | 179.798 | 3.33618 | 0.93637 | 0.66761 |
| N26    | Healthy | 225     | 260.455 | 255.23  | 2.42326 | 0.70846 | 0.44742 |
| N27    | Healthy | 172     | 195     | 190.087 | 3.41972 | 0.9186  | 0.66435 |
| N28    | Healthy | 192     | 265.929 | 252.427 | 3.54036 | 0.9494  | 0.67339 |
| N29    | Healthy | 248     | 279.364 | 291.201 | 2.82701 | 0.82944 | 0.51275 |
| N30    | Healthy | 184     | 221.714 | 217.338 | 3.37138 | 0.93339 | 0.64649 |
| N31    | Healthy | 235     | 293.235 | 279.766 | 3.9072  | 0.96189 | 0.71566 |
| N32    | Healthy | 192     | 231     | 236.674 | 3.26906 | 0.90313 | 0.62179 |
| N33    | Healthy | 238     | 264.037 | 267.221 | 3.5499  | 0.94022 | 0.64871 |
| N34    | Healthy | 227     | 315.773 | 305.056 | 2.76116 | 0.78278 | 0.50897 |
| N35    | Healthy | 238     | 338.625 | 325.516 | 3.41344 | 0.93305 | 0.62377 |
| N36    | Healthy | 199     | 244.769 | 235.667 | 3.85596 | 0.95997 | 0.72846 |
| N37    | Healthy | 262     | 307     | 298.452 | 3.903   | 0.96371 | 0.70093 |
| N38    | Healthy | 232     | 274     | 259.895 | 3.57701 | 0.9108  | 0.65673 |
| N39    | Healthy | 259     | 321.636 | 308.457 | 3.85296 | 0.95499 | 0.69337 |
| N40    | Healthy | 232     | 266.44  | 264.705 | 2.7303  | 0.78738 | 0.50127 |
| N41    | Healthy | 267     | 319.556 | 305.419 | 3.75879 | 0.94395 | 0.67274 |
| P001   | PCOS-LB | 220     | 272.556 | 266.417 | 3.59596 | 0.94438 | 0.66671 |
| P002   | PCOS-HB | 144     | 158.438 | 162.959 | 3.14827 | 0.90752 | 0.63348 |
| P003   | PCOS-HB | 175     | 212.8   | 198.196 | 3.46488 | 0.93477 | 0.67087 |
| P004   | PCOS-HB | 123     | 144.375 | 137.445 | 3.11616 | 0.92977 | 0.64756 |
| P005   | PCOS-HB | 202     | 231.75  | 237.263 | 3.87753 | 0.96697 | 0.73047 |
| P006   | PCOS-LB | 280     | 333.813 | 316.808 | 4.19422 | 0.96909 | 0.74434 |
| P007   | PCOS-LB | 147     | 174     | 171.09  | 2.95962 | 0.90906 | 0.59306 |
| P008   | PCOS-HB | 160     | 181     | 174.864 | 3.40261 | 0.93642 | 0.67044 |
| P009   | PCOS-LB | 279     | 339.273 | 328.119 | 4.01318 | 0.96325 | 0.71267 |
| P010   | PCOS-HB | 112     | 137.5   | 129.94  | 3.15523 | 0.92243 | 0.66869 |
| P012   | PCOS-HB | 160     | 169.5   | 174.32  | 3.6094  | 0.95421 | 0.71119 |
| P013   | PCOS-HB | 219     | 230.5   | 235.558 | 3.76963 | 0.95209 | 0.69949 |

|      |         |     |         |         |         |         |         |
|------|---------|-----|---------|---------|---------|---------|---------|
| P014 | PCOS-LB | 249 | 282.3   | 276.13  | 3.94373 | 0.96047 | 0.71477 |
| P015 | PCOS-HB | 234 | 262.636 | 262.038 | 3.60213 | 0.9236  | 0.6603  |
| P016 | PCOS-LB | 211 | 266.714 | 253.811 | 3.5321  | 0.93069 | 0.65998 |
| P017 | PCOS-LB | 281 | 330.583 | 303.452 | 4.21612 | 0.97192 | 0.74776 |
| P018 | PCOS-HB | 186 | 221.429 | 212.873 | 3.48877 | 0.94078 | 0.66761 |
| P019 | PCOS-HB | 285 | 316.316 | 308.478 | 4.3338  | 0.97404 | 0.76671 |
| P020 | PCOS-LB | 218 | 242.231 | 251.984 | 3.47048 | 0.92885 | 0.64453 |
| P021 | PCOS-HB | 261 | 298.625 | 300.481 | 3.07221 | 0.80885 | 0.55211 |
| P022 | PCOS-LB | 244 | 287.043 | 285.564 | 3.43272 | 0.90046 | 0.62445 |
| P023 | PCOS-LB | 217 | 228.55  | 229.321 | 3.57957 | 0.93991 | 0.66536 |
| P024 | PCOS-HB | 203 | 265     | 230.299 | 3.7133  | 0.94935 | 0.69888 |
| P025 | PCOS-HB | 117 | 134.143 | 128.326 | 2.90686 | 0.89278 | 0.61041 |
| P026 | PCOS-HB | 90  | 95.6    | 93.3039 | 2.46021 | 0.82193 | 0.54674 |
| P027 | PCOS-HB | 148 | 183.1   | 172.03  | 3.3206  | 0.92148 | 0.66449 |
| P028 | PCOS-LB | 226 | 269.333 | 264.635 | 3.5161  | 0.9287  | 0.64866 |
| P030 | PCOS-LB | 150 | 285.333 | 180.047 | 3.48331 | 0.94751 | 0.69518 |
| P031 | PCOS-LB | 221 | 228.65  | 231.082 | 3.79463 | 0.94743 | 0.70295 |
| P033 | PCOS-HB | 171 | 199.05  | 214.557 | 3.49205 | 0.93748 | 0.67917 |
| P034 | PCOS-LB | 142 | 155.154 | 161.581 | 3.70372 | 0.96191 | 0.74735 |
| P035 | PCOS-HB | 260 | 324.474 | 301.25  | 3.63307 | 0.94643 | 0.65335 |
| P036 | PCOS-LB | 201 | 246.556 | 246.246 | 3.6384  | 0.94382 | 0.68606 |
| P037 | PCOS-LB | 238 | 279.053 | 274.013 | 3.66068 | 0.94722 | 0.66895 |
| P038 | PCOS-HB | 257 | 305.75  | 286.232 | 3.98844 | 0.96389 | 0.71876 |
| P039 | PCOS-HB | 159 | 181.545 | 194.511 | 3.47693 | 0.94906 | 0.68593 |
| P040 | PCOS-HB | 191 | 202.5   | 209.204 | 3.42643 | 0.92296 | 0.65237 |
| P041 | PCOS-HB | 218 | 264.867 | 254.083 | 3.35153 | 0.90499 | 0.62244 |
| P042 | PCOS-HB | 199 | 232.214 | 223.666 | 3.59285 | 0.94302 | 0.67875 |
| P043 | PCOS-HB | 237 | 255     | 256.795 | 3.78015 | 0.95782 | 0.69131 |
| P044 | PCOS-LB | 231 | 260.077 | 252.406 | 4.12256 | 0.96954 | 0.75749 |
| P045 | PCOS-HB | 186 | 214.05  | 214.809 | 3.22538 | 0.93151 | 0.61721 |
| P046 | PCOS-HB | 128 | 176.462 | 165.181 | 1.67143 | 0.63371 | 0.34448 |
| P047 | PCOS-LB | 115 | 119.875 | 124.301 | 3.24672 | 0.94292 | 0.68425 |
| P048 | PCOS-LB | 254 | 289.455 | 289.92  | 3.78457 | 0.95655 | 0.68346 |
| P049 | PCOS-HB | 217 | 274     | 252.98  | 3.86657 | 0.96395 | 0.71871 |
| P050 | PCOS-LB | 75  | 88      | 88.0585 | 1.46007 | 0.48735 | 0.33817 |
| P051 | PCOS-LB | 193 | 220.556 | 217.51  | 2.84172 | 0.84186 | 0.53998 |
| P052 | PCOS-LB | 182 | 195.125 | 198.543 | 3.70323 | 0.95365 | 0.71161 |
| P053 | PCOS-LB | 152 | 160.75  | 161.769 | 3.51649 | 0.94718 | 0.69995 |
| P054 | PCOS-LB | 181 | 279.333 | 259.85  | 2.27498 | 0.74464 | 0.43762 |
| P056 | PCOS-LB | 185 | 214.176 | 212.181 | 3.11051 | 0.90173 | 0.59584 |
| P057 | PCOS-LB | 196 | 231.2   | 229.964 | 3.53952 | 0.93963 | 0.6706  |
| P058 | PCOS-HB | 164 | 180.867 | 185.274 | 3.30322 | 0.92467 | 0.64771 |
| P059 | PCOS-LB | 225 | 252.75  | 253.712 | 3.49552 | 0.93081 | 0.64539 |
| P060 | PCOS-HB | 225 | 276.476 | 267.389 | 3.66109 | 0.95543 | 0.67596 |
| P061 | PCOS-LB | 200 | 223.4   | 220.104 | 3.55175 | 0.92968 | 0.67035 |
| P062 | PCOS-LB | 269 | 308.808 | 314.589 | 3.85895 | 0.94342 | 0.68975 |
| P063 | PCOS-LB | 204 | 239     | 239.714 | 3.65768 | 0.94609 | 0.68778 |
| P064 | PCOS-LB | 247 | 277.273 | 276.287 | 3.83944 | 0.95828 | 0.69689 |
| P065 | PCOS-HB | 91  | 101.111 | 106.917 | 2.83976 | 0.90538 | 0.62954 |
| P066 | PCOS-LB | 182 | 195.154 | 193.158 | 3.73382 | 0.95871 | 0.71749 |
| P067 | PCOS-HB | 137 | 150.909 | 148.843 | 3.16581 | 0.90785 | 0.64346 |
| P068 | PCOS-LB | 198 | 219.75  | 227.564 | 3.37754 | 0.93051 | 0.63869 |

|      |         |     |         |         |         |         |         |
|------|---------|-----|---------|---------|---------|---------|---------|
| P069 | PCOS-LB | 205 | 224.773 | 229.598 | 3.61255 | 0.9528  | 0.67867 |
| P070 | PCOS-LB | 173 | 202.063 | 206.627 | 3.27733 | 0.90524 | 0.63597 |
| P071 | PCOS-HB | 238 | 279.778 | 285.447 | 3.67556 | 0.94665 | 0.67167 |
| P072 | PCOS-HB | 223 | 262.261 | 260.309 | 3.64878 | 0.95199 | 0.6748  |
| P073 | PCOS-HB | 134 | 151.273 | 153.301 | 3.05516 | 0.90835 | 0.62378 |
| P074 | PCOS-HB | 214 | 268.077 | 245.846 | 3.9201  | 0.96741 | 0.73055 |
| P075 | PCOS-LB | 214 | 241.75  | 249.291 | 3.55345 | 0.92308 | 0.66222 |
| P076 | PCOS-HB | 191 | 230     | 228.458 | 2.98467 | 0.88366 | 0.56826 |
| P077 | PCOS-HB | 218 | 263.556 | 258.578 | 3.82041 | 0.9533  | 0.70952 |
| P078 | PCOS-LB | 274 | 342.143 | 324.43  | 3.53823 | 0.93057 | 0.63035 |
| P079 | PCOS-HB | 272 | 305.3   | 297.589 | 4.34233 | 0.97887 | 0.77461 |
| P080 | PCOS-HB | 227 | 303.154 | 272.465 | 3.58673 | 0.93002 | 0.66116 |
| P081 | PCOS-HB | 222 | 255.158 | 254.354 | 3.70004 | 0.94826 | 0.68485 |
| P082 | PCOS-LB | 151 | 159.053 | 164.69  | 3.452   | 0.93924 | 0.68802 |
| P083 | PCOS-HB | 195 | 230.2   | 218.413 | 3.08178 | 0.88026 | 0.58445 |
| P084 | PCOS-LB | 178 | 211.476 | 215.239 | 2.63315 | 0.82607 | 0.50815 |
| P085 | PCOS-LB | 177 | 232.5   | 213.589 | 2.98835 | 0.89868 | 0.57733 |
| P086 | PCOS-LB | 238 | 292.667 | 276.044 | 3.60564 | 0.93759 | 0.65889 |
| P087 | PCOS-LB | 157 | 179.556 | 185.838 | 3.51661 | 0.95388 | 0.6955  |
| P088 | PCOS-HB | 206 | 251.316 | 249.244 | 2.85768 | 0.8334  | 0.53636 |
| P089 | PCOS-LB | 199 | 241     | 234.648 | 3.48669 | 0.92117 | 0.6587  |
| P090 | PCOS-HB | 270 | 309     | 315.118 | 3.1066  | 0.88754 | 0.55491 |
| P092 | PCOS-LB | 257 | 298     | 291.593 | 3.42946 | 0.88995 | 0.61802 |
| P093 | PCOS-LB | 192 | 228.909 | 216.339 | 3.59294 | 0.94782 | 0.68339 |
| P094 | PCOS-LB | 176 | 224.75  | 215.134 | 3.17726 | 0.91738 | 0.6145  |
| P095 | PCOS-LB | 159 | 190.909 | 180.602 | 2.47614 | 0.76531 | 0.4885  |
| P096 | PCOS-HB | 184 | 232.235 | 227.695 | 3.10926 | 0.90271 | 0.59622 |
| P097 | PCOS-HB | 197 | 248.75  | 258.538 | 3.21513 | 0.89446 | 0.60856 |
| P099 | PCOS-LB | 236 | 288.929 | 267.696 | 3.81549 | 0.94972 | 0.69832 |
| P100 | PCOS-HB | 188 | 227     | 228.648 | 3.48689 | 0.94324 | 0.66589 |
| P101 | PCOS-HB | 242 | 281.417 | 279.479 | 3.39756 | 0.92106 | 0.61898 |
| P102 | PCOS-HB | 200 | 224.667 | 233.699 | 2.54034 | 0.78367 | 0.47946 |
| P103 | PCOS-HB | 185 | 233.462 | 221.625 | 3.36232 | 0.92209 | 0.64408 |
| P104 | PCOS-HB | 132 | 157     | 157.663 | 3.03712 | 0.88045 | 0.622   |

**Supplementary Table 4** Correlation between diversity and clinical parameters

|            | Observe      | Chao1        | ACE          | Shannon | Simpson | J            |
|------------|--------------|--------------|--------------|---------|---------|--------------|
| TT         | -0.15        | <b>-0.19</b> | <b>-0.19</b> | 0       | 0.05    | 0.06         |
| AD         | -0.09        | -0.1         | -0.12        | 0.02    | 0.05    | 0.06         |
| DHEA-S     | -0.09        | -0.11        | -0.12        | 0.14    | 0.17    | <b>0.2</b>   |
| LH         | -0.05        | -0.09        | -0.08        | 0.04    | 0.02    | 0.07         |
| FSH        | -0.14        | -0.17        | -0.17        | 0.04    | 0.05    | <b>0.1</b>   |
| I0         | <b>-0.23</b> | <b>-0.23</b> | <b>-0.24</b> | -0.12   | -0.08   | -0.06        |
| I120       | <b>-0.22</b> | <b>-0.24</b> | <b>-0.23</b> | -0.05   | -0.04   | 0.02         |
| HOMA-IR    | <b>-0.21</b> | <b>-0.2</b>  | <b>-0.22</b> | -0.12   | -0.08   | -0.06        |
| IL-22      | -0.07        | -0.12        | -0.12        | 0.03    | 0.01    | 0.06         |
| FKBP5-Met1 | 0.11         | <b>0.17</b>  | <b>0.18</b>  | -0.15   | -0.14   | <b>-0.22</b> |
| FKBP5-Met2 | <b>0.21</b>  | <b>0.25</b>  | <b>0.24</b>  | -0.01   | -0.04   | -0.1         |
| FKBP5-Met  | <b>0.2</b>   | <b>0.26</b>  | <b>0.25</b>  | -0.07   | -0.09   | -0.16        |

|         | FKBP5-Met1   | FKBP5-Met2   | FKBP5-Met    |
|---------|--------------|--------------|--------------|
| TT      | <b>-0.18</b> | -0.1         | -0.15        |
| AD      | -0.17        | -0.11        | -0.15        |
| DHEA-S  | -0.04        | 0.01         | -0.01        |
| LH      | <b>-0.18</b> | -0.14        | <b>-0.18</b> |
| FSH     | -0.08        | -0.06        | -0.08        |
| I0      | -0.11        | -0.12        | -0.14        |
| I120    | <b>-0.21</b> | <b>-0.2</b>  | <b>-0.23</b> |
| HOMA-IR | -0.12        | -0.1         | -0.13        |
| IL-22   | -0.11        | <b>-0.19</b> | <b>-0.18</b> |



**Supplementary Table 5** The relative abundance of bacterial phylum taxa among healthy and PCOS patients

| sample | Actinobac | Bacteroid | Cyanobacteria | Deferribacteres | Epsilonbacteraeota | Euryarchaeota | Firmicutes | Fusobacteria | Patescibacteria |
|--------|-----------|-----------|---------------|-----------------|--------------------|---------------|------------|--------------|-----------------|
| N1     | 0.00534   | 0.52059   | 0             | 0               | 0                  | 0             | 0.41470399 | 0.000611326  | 0               |
| N2     | 0.01248   | 0.21702   | 0.000225225   | 6.43501E-05     | 0                  | 0.004247104   | 0.73465251 | 0            | 3.2175E-05      |
| N3     | 0.00557   | 0.65238   | 0.000546976   | 0               | 0                  | 3.2175E-05    | 0.3213964  | 0            | 0               |
| N4     | 0.025     | 0.26393   | 0             | 0               | 0                  | 0             | 0.69774775 | 0            | 0               |
| N5     | 0.00772   | 0.51918   | 0.002574003   | 0               | 0                  | 0             | 0.44671815 | 0.003088803  | 3.2175E-05      |
| N6     | 0.18639   | 0.2806    | 6.43501E-05   | 0               | 0                  | 0             | 0.5268018  | 3.2175E-05   | 9.65251E-05     |
| N7     | 0.07761   | 0.09833   | 0             | 0               | 0                  | 0             | 0.80717503 | 0            | 3.2175E-05      |
| N8     | 0.00232   | 0.39266   | 0             | 3.2175E-05      | 0                  | 0             | 0.58114543 | 0            | 6.43501E-05     |
| N10    | 0.01281   | 0.27786   | 9.65251E-05   | 0               | 0                  | 0             | 0.69945302 | 0            | 0               |
| N11    | 0.04633   | 0.09775   | 0             | 0               | 0                  | 0             | 0.85357143 | 0            | 6.43501E-05     |
| N12    | 0.00254   | 0.38977   | 0             | 0               | 0                  | 0             | 0.56489704 | 3.2175E-05   | 9.65251E-05     |
| N14    | 0.00386   | 0.56931   | 0             | 0               | 0                  | 0             | 0.39996782 | 0            | 3.2175E-05      |
| N15    | 0.00151   | 0.05885   | 0             | 0               | 0                  | 0             | 0.93227156 | 0.002413127  | 0.0002574       |
| N16    | 0.01065   | 0.49588   | 0             | 0               | 0                  | 0             | 0.48426641 | 0            | 0               |
| N17    | 0.00151   | 0.37719   | 0             | 0               | 0                  | 0             | 0.59366152 | 0            | 3.2175E-05      |
| N18    | 0.01525   | 0.54244   | 9.65251E-05   | 0               | 0                  | 0             | 0.40006435 | 3.2175E-05   | 3.2175E-05      |
| N19    | 0.01071   | 0.19604   | 0             | 0               | 0                  | 0             | 0.77889318 | 0            | 0               |
| N20    | 0.01158   | 0.30302   | 0             | 0               | 0                  | 0             | 0.67850708 | 0            | 3.2175E-05      |
| N21    | 0.0324    | 0.36686   | 0             | 0               | 0                  | 0             | 0.50125483 | 0            | 9.65251E-05     |
| N22    | 0.0029    | 0.51873   | 6.43501E-05   | 0               | 0                  | 0             | 0.39005792 | 0.053603604  | 0               |
| N23    | 0.01445   | 0.4593    | 0             | 3.2175E-05      | 0                  | 0             | 0.5030888  | 0.003217503  | 0               |
| N24    | 0.00064   | 0.5353    | 0             | 0               | 0                  | 0             | 0.38655084 | 0.014092664  | 0               |
| N26    | 0.00354   | 0.66811   | 0             | 0               | 0                  | 0             | 0.32351995 | 3.2175E-05   | 3.2175E-05      |
| N27    | 0.00158   | 0.58858   | 0             | 0               | 0                  | 0             | 0.35897683 | 0.001769627  | 0               |
| N28    | 0.0092    | 0.23536   | 0             | 0               | 0                  | 0             | 0.66808237 | 0.072361647  | 6.43501E-05     |
| N29    | 0.00833   | 0.69839   | 0             | 0               | 0                  | 0             | 0.27541828 | 3.2175E-05   | 0               |
| N30    | 0.00727   | 0.30167   | 0             | 0               | 0                  | 0             | 0.521139   | 0.026608752  | 0               |
| N31    | 0.04524   | 0.26422   | 0             | 0               | 0                  | 0             | 0.65324968 | 0.001287001  | 3.2175E-05      |
| N32    | 0.09591   | 0.34801   | 0             | 0               | 0                  | 0             | 0.53458816 | 0            | 0               |
| N33    | 0.16351   | 0.20718   | 0             | 0               | 0                  | 0             | 0.62149292 | 0.000160875  | 0.000160875     |
| N34    | 0.01133   | 0.62407   | 0             | 3.2175E-05      | 0                  | 0             | 0.34546332 | 9.65251E-05  | 0               |
| N35    | 0.02815   | 0.34704   | 3.2175E-05    | 6.43501E-05     | 0                  | 0             | 0.55       | 0.037162162  | 9.65251E-05     |

|      |         |         |             |            |             |             |            |             |             |
|------|---------|---------|-------------|------------|-------------|-------------|------------|-------------|-------------|
| N36  | 0.03771 | 0.34447 | 0           | 0          | 0           | 0           | 0.60534106 | 0.000772201 | 6.43501E-05 |
| N37  | 0.0177  | 0.22696 | 0           | 0          | 0           | 0.003539254 | 0.73519949 | 0           | 6.43501E-05 |
| N38  | 0.00035 | 0.47159 | 0           | 0          | 0           | 0           | 0.51544402 | 0           | 3.2175E-05  |
| N39  | 0.02272 | 0.21744 | 0           | 0          | 0           | 0           | 0.7287323  | 0           | 0           |
| N40  | 0.00209 | 0.63787 | 0           | 0          | 0           | 0           | 0.34305019 | 0           | 0           |
| N41  | 0.00672 | 0.36406 | 3.2175E-05  | 0          | 0           | 0           | 0.58072716 | 0           | 3.2175E-05  |
| P001 | 0.00309 | 0.45103 | 3.2175E-05  | 0          | 0           | 0           | 0.51332046 | 0           | 6.43501E-05 |
| P002 | 0.00283 | 0.42455 | 0           | 0          | 0           | 0           | 0.53458816 | 0.005501931 | 0           |
| P003 | 0.01145 | 0.38105 | 3.2175E-05  | 0          | 0           | 0           | 0.56753539 | 0           | 0           |
| P004 | 0.01306 | 0.10682 | 3.2175E-05  | 0          | 0           | 0           | 0.75350708 | 0.122651223 | 0           |
| P005 | 0.00708 | 0.31577 | 0.000579151 | 0          | 9.65251E-05 | 0           | 0.60382883 | 0.007110682 | 0.00019305  |
| P006 | 0.02239 | 0.2075  | 6.43501E-05 | 0          | 3.2175E-05  | 0.001222651 | 0.7505148  | 0           | 0           |
| P007 | 0.00322 | 0.39607 | 3.2175E-05  | 0          | 0           | 0           | 0.58490991 | 0.000675676 | 0.00019305  |
| P008 | 0.01213 | 0.25328 | 0           | 0          | 3.2175E-05  | 0           | 0.72059202 | 0           | 6.43501E-05 |
| P009 | 0.01033 | 0.34923 | 0           | 0          | 0.000225225 | 0           | 0.57702703 | 3.2175E-05  | 0           |
| P010 | 0.01213 | 0.50952 | 0           | 0          | 0           | 0           | 0.3041184  | 0.108462033 | 6.43501E-05 |
| P012 | 0.01364 | 0.32619 | 0           | 0          | 0           | 0           | 0.63513514 | 0           | 0           |
| P013 | 0.0056  | 0.37709 | 0           | 0          | 0           | 0           | 0.56882239 | 0           | 6.43501E-05 |
| P014 | 0.00859 | 0.40676 | 3.2175E-05  | 0          | 0           | 0           | 0.56969112 | 0           | 0           |
| P015 | 0.00524 | 0.44176 | 6.43501E-05 | 0          | 0           | 0           | 0.51737452 | 0           | 3.2175E-05  |
| P016 | 0.00692 | 0.38941 | 0           | 0          | 0           | 0           | 0.57477477 | 0           | 3.2175E-05  |
| P017 | 0.0037  | 0.4083  | 0           | 0          | 0           | 0.000160875 | 0.5472973  | 0           | 0           |
| P018 | 0.01779 | 0.45923 | 0           | 0          | 0           | 0           | 0.4543758  | 0.060682111 | 0           |
| P019 | 0.00309 | 0.19772 | 3.2175E-05  | 0          | 0           | 0           | 0.75833333 | 0           | 0           |
| P020 | 0.01757 | 0.50502 | 0           | 0          | 0           | 0           | 0.39720077 | 0           | 6.43501E-05 |
| P021 | 0.00106 | 0.58523 | 0           | 0          | 0           | 0           | 0.39498069 | 0.000289575 | 3.2175E-05  |
| P022 | 0.00505 | 0.48784 | 0           | 0          | 0           | 0           | 0.48564994 | 0           | 6.43501E-05 |
| P023 | 0.00241 | 0.49279 | 0           | 0          | 0           | 0.000225225 | 0.48346203 | 0           | 0           |
| P024 | 0.01281 | 0.39672 | 0.0001287   | 0          | 0           | 0           | 0.5492278  | 0           | 0           |
| P025 | 0.00907 | 0.66963 | 0           | 3.2175E-05 | 0           | 0           | 0.24620335 | 0           | 3.2175E-05  |
| P026 | 0.00048 | 0.7249  | 0           | 0          | 0           | 0           | 0.20453668 | 0           | 0           |
| P027 | 0.00071 | 0.37387 | 0           | 0          | 0           | 0           | 0.54208494 | 0.021364221 | 0.000160875 |
| P028 | 0.00418 | 0.54813 | 0           | 0          | 0           | 0           | 0.42027027 | 3.2175E-05  | 0           |
| P030 | 0.02165 | 0.26094 | 0           | 0          | 0           | 0           | 0.62181467 | 0           | 0           |

|      |         |         |             |             |   |             |            |             |             |
|------|---------|---------|-------------|-------------|---|-------------|------------|-------------|-------------|
| P031 | 0.01313 | 0.40351 | 0           | 0           | 0 | 0           | 0.56772844 | 0           | 0           |
| P033 | 0.04205 | 0.19408 | 0           | 0.033815959 | 0 | 0           | 0.7014157  | 0           | 0.025289575 |
| P034 | 0.03623 | 0.55061 | 0           | 0.036583012 | 0 | 0           | 0.30363578 | 0           | 0.012934363 |
| P035 | 0.00122 | 0.36284 | 0           | 0           | 0 | 0           | 0.57245817 | 0.004761905 | 3.2175E-05  |
| P036 | 0.02249 | 0.2722  | 0           | 0           | 0 | 0           | 0.64037967 | 9.65251E-05 | 9.65251E-05 |
| P037 | 0.00257 | 0.55039 | 3.2175E-05  | 0           | 0 | 0.000353925 | 0.42712355 | 0           | 3.2175E-05  |
| P038 | 0.01387 | 0.25325 | 0           | 0           | 0 | 0           | 0.66875804 | 0.007689833 | 0           |
| P039 | 0.00161 | 0.17523 | 0           | 0           | 0 | 0           | 0.7527027  | 0.00045045  | 3.2175E-05  |
| P040 | 0.00097 | 0.61168 | 3.2175E-05  | 0           | 0 | 0           | 0.35418275 | 0           | 3.2175E-05  |
| P041 | 0.01271 | 0.386   | 0           | 0           | 0 | 0           | 0.57226512 | 3.2175E-05  | 3.2175E-05  |
| P042 | 0.02246 | 0.29916 | 0           | 0           | 0 | 0           | 0.6256435  | 0           | 3.2175E-05  |
| P043 | 0.00679 | 0.49607 | 0           | 0           | 0 | 0           | 0.46747104 | 3.2175E-05  | 3.2175E-05  |
| P044 | 0.00785 | 0.29041 | 9.65251E-05 | 0           | 0 | 0           | 0.63304376 | 0.010199485 | 0           |
| P045 | 0.00199 | 0.37262 | 0           | 0           | 0 | 0           | 0.34259974 | 0.207754183 | 3.2175E-05  |
| P046 | 0.00808 | 0.27178 | 3.2175E-05  | 0           | 0 | 0           | 0.11483269 | 0.006531532 | 0.000225225 |
| P047 | 0.01873 | 0.13687 | 0           | 0           | 0 | 0           | 0.70453668 | 0.002059202 | 6.43501E-05 |
| P048 | 0.00827 | 0.48279 | 0           | 0           | 0 | 0           | 0.43667954 | 0.030083655 | 0           |
| P049 | 0.01104 | 0.43475 | 0           | 0           | 0 | 0           | 0.50942728 | 0.00019305  | 0           |
| P050 | 0.00045 | 0.74295 | 0           | 0           | 0 | 0           | 0.19430502 | 0.053507079 | 3.2175E-05  |
| P051 | 0.0009  | 0.19685 | 0           | 0           | 0 | 0           | 0.74083012 | 0           | 6.43501E-05 |
| P052 | 0.00653 | 0.47014 | 0           | 0           | 0 | 0           | 0.48381596 | 0.00019305  | 0           |
| P053 | 0.00537 | 0.55415 | 0           | 0           | 0 | 0           | 0.37715573 | 0.026126126 | 6.43501E-05 |
| P054 | 0.01068 | 0.18658 | 0.004375804 | 0           | 0 | 0           | 0.68388031 | 0           | 0.000514801 |
| P056 | 0.00692 | 0.65586 | 0           | 0           | 0 | 0           | 0.28841699 | 0.004761905 | 0.000160875 |
| P057 | 0.00061 | 0.57886 | 0           | 0           | 0 | 0           | 0.39800515 | 0           | 9.65251E-05 |
| P058 | 0.00647 | 0.3472  | 0           | 0           | 0 | 0           | 0.6287323  | 0           | 0           |
| P059 | 0.00447 | 0.54633 | 0           | 3.2175E-05  | 0 | 0           | 0.42184685 | 0           | 6.43501E-05 |
| P060 | 0.01216 | 0.57005 | 0           | 3.2175E-05  | 0 | 0           | 0.35212355 | 0.000514801 | 0           |
| P061 | 0.00647 | 0.2916  | 0           | 0           | 0 | 0           | 0.6759009  | 6.43501E-05 | 0.000160875 |
| P062 | 0.00306 | 0.20721 | 3.2175E-05  | 0           | 0 | 0           | 0.7778314  | 0           | 3.2175E-05  |
| P063 | 0.04614 | 0.24649 | 0           | 0           | 0 | 0           | 0.6962677  | 0.000353925 | 3.2175E-05  |
| P064 | 0.02153 | 0.23851 | 0           | 0           | 0 | 0           | 0.71283784 | 0           | 0           |
| P065 | 0.06795 | 0.36001 | 0           | 0           | 0 | 0           | 0.45630631 | 0.000740026 | 0.0001287   |
| P066 | 0.00148 | 0.25183 | 0           | 0           | 0 | 0           | 0.69527027 | 0.005823681 | 0.000160875 |

|      |         |         |             |            |            |             |            |             |             |
|------|---------|---------|-------------|------------|------------|-------------|------------|-------------|-------------|
| P067 | 0.00122 | 0.43108 | 0           | 0          | 0          | 0           | 0.51940154 | 3.2175E-05  | 9.65251E-05 |
| P068 | 0.00251 | 0.50273 | 0           | 0          | 0          | 0           | 0.4756435  | 0           | 0           |
| P069 | 0.02754 | 0.17156 | 0           | 0          | 0          | 0           | 0.79108752 | 0           | 0           |
| P070 | 0.04131 | 0.36818 | 0           | 0          | 0          | 0           | 0.53407336 | 0.000868726 | 3.2175E-05  |
| P071 | 0.06998 | 0.29112 | 0           | 0          | 0          | 0           | 0.62393822 | 0.000836551 | 0.0003861   |
| P072 | 0.06123 | 0.05653 | 3.2175E-05  | 0          | 0          | 0           | 0.77853925 | 0           | 9.65251E-05 |
| P073 | 0.00322 | 0.36432 | 0           | 0          | 0          | 0           | 0.60125483 | 0           | 6.43501E-05 |
| P074 | 0.01142 | 0.26313 | 0           | 0          | 0          | 0           | 0.70820463 | 0           | 0           |
| P075 | 0.00431 | 0.47069 | 0           | 0          | 0          | 0           | 0.50633848 | 0.011196911 | 3.2175E-05  |
| P076 | 0.0064  | 0.40203 | 0           | 0          | 0          | 0           | 0.51515444 | 0           | 0           |
| P077 | 0.00421 | 0.3008  | 0           | 3.2175E-05 | 0          | 0           | 0.67326255 | 3.2175E-05  | 3.2175E-05  |
| P078 | 0.02423 | 0.27346 | 0           | 0          | 0          | 0           | 0.62432432 | 0.001383526 | 3.2175E-05  |
| P079 | 0.02931 | 0.18967 | 0           | 0          | 0          | 0.001640927 | 0.74745817 | 0           | 3.2175E-05  |
| P080 | 0.00428 | 0.33246 | 0           | 0          | 0          | 0           | 0.62828185 | 0           | 0           |
| P081 | 0.00412 | 0.30438 | 3.2175E-05  | 0          | 0          | 0           | 0.67815315 | 0           | 0           |
| P082 | 0.02841 | 0.16927 | 0           | 0          | 0          | 0           | 0.7759009  | 9.65251E-05 | 9.65251E-05 |
| P083 | 0.00241 | 0.61181 | 0           | 0          | 0          | 0           | 0.36875804 | 0           | 0           |
| P084 | 0.00701 | 0.70833 | 0.000418275 | 0          | 0          | 0           | 0.25312098 | 0.002155727 | 3.2175E-05  |
| P085 | 0.01046 | 0.42046 | 0           | 0          | 3.2175E-05 | 0           | 0.48294723 | 0.023391248 | 0           |
| P086 | 0.00122 | 0.42127 | 0           | 0          | 0          | 0           | 0.54057272 | 0.000707851 | 3.2175E-05  |
| P087 | 0.17046 | 0.07574 | 0           | 0          | 0          | 0           | 0.73092021 | 9.65251E-05 | 0.000160875 |
| P088 | 0.05019 | 0.64453 | 0           | 0          | 0          | 0           | 0.29147362 | 0           | 0           |
| P089 | 0.00354 | 0.25148 | 0           | 0          | 0          | 0           | 0.69720077 | 6.43501E-05 | 6.43501E-05 |
| P090 | 0.0129  | 0.52593 | 0           | 0          | 0          | 0.0001287   | 0.42876448 | 0.000353925 | 3.2175E-05  |
| P092 | 0.00219 | 0.5323  | 0           | 0          | 0          | 0           | 0.42274775 | 0.003410553 | 6.43501E-05 |
| P093 | 0.03169 | 0.42481 | 0           | 0          | 0          | 0           | 0.50707851 | 0.00019305  | 0           |
| P094 | 0.10138 | 0.30608 | 0           | 0          | 0          | 0           | 0.54227799 | 0.007561133 | 9.65251E-05 |
| P095 | 0.00389 | 0.65183 | 0           | 0          | 0          | 0           | 0.30952381 | 0           | 3.2175E-05  |
| P096 | 0.00589 | 0.38687 | 0           | 0          | 0          | 0           | 0.59272844 | 3.2175E-05  | 6.43501E-05 |
| P097 | 0.00148 | 0.57436 | 0           | 0          | 0          | 0           | 0.40267053 | 0           | 0           |
| P099 | 0.00331 | 0.27342 | 0           | 0          | 0          | 0           | 0.70987773 | 0           | 0           |
| P100 | 0.03134 | 0.35222 | 0           | 0          | 0          | 0           | 0.56386744 | 0.005791506 | 0.00045045  |
| P101 | 0.00109 | 0.53201 | 0.000160875 | 0          | 0          | 0           | 0.43291506 | 0.000804376 | 0.0001287   |
| P102 | 0.00203 | 0.76641 | 0           | 0          | 0          | 0           | 0.22039897 | 3.2175E-05  | 0           |

|      |         |         |             |   |   |   |            |            |             |
|------|---------|---------|-------------|---|---|---|------------|------------|-------------|
| P103 | 0.01133 | 0.475   | 0           | 0 | 0 | 0 | 0.47561133 | 0          | 0           |
| P104 | 0.02944 | 0.51464 | 6.43501E-05 | 0 | 0 | 0 | 0.4018018  | 3.2175E-05 | 9.65251E-05 |

---

| Proteobacteria | Synergistetes | Tenericutes | Verrucomicrobia |
|----------------|---------------|-------------|-----------------|
| 0.058236808    | 0.000514801   | 0           | 0               |
| 0.028153153    | 0.000900901   | 0           | 0.002220077     |
| 0.02007722     | 0             | 0           | 0               |
| 0.013288288    | 0             | 0           | 3.2175E-05      |
| 0.020688546    | 0             | 0           | 0               |
| 0.006016731    | 0             | 0           | 0               |
| 0.016859717    | 0             | 0           | 0               |
| 0.023230373    | 0.000546976   | 0           | 0               |
| 0.00978121     | 0             | 0           | 0               |
| 0.001962677    | 3.2175E-05    | 0           | 0.000289575     |
| 0.042631918    | 0             | 0           | 3.2175E-05      |
| 0.026769627    | 6.43501E-05   | 0           | 0               |
| 0.004697555    | 0             | 0           | 0               |
| 0.009202059    | 0             | 0           | 0               |
| 0.027606178    | 0             | 0           | 0               |
| 0.042084942    | 0             | 0           | 0               |
| 0.014350064    | 0             | 0           | 0               |
| 0.006756757    | 0             | 0           | 9.65251E-05     |
| 0.09520592     | 0.003635779   | 0           | 0.000546976     |
| 0.033494208    | 0.001158301   | 0           | 0               |
| 0.019916345    | 0             | 0           | 0               |
| 0.063416988    | 0             | 0           | 0               |
| 0.004761905    | 0             | 0           | 0               |
| 0.049099099    | 0             | 0           | 0               |
| 0.014864865    | 0             | 0           | 6.43501E-05     |
| 0.017792793    | 0             | 0           | 3.2175E-05      |
| 0.143307593    | 0             | 0           | 0               |
| 0.035971686    | 0             | 0           | 0               |
| 0.021492921    | 0             | 0           | 0               |
| 0.007464607    | 0             | 0           | 3.2175E-05      |
| 0.019015444    | 0             | 0           | 0               |
| 0.037451737    | 0             | 0           | 0               |

|             |             |             |             |
|-------------|-------------|-------------|-------------|
| 0.011615187 | 0           | 0           | 3.2175E-05  |
| 0.015765766 | 0.000643501 | 0           | 0.0001287   |
| 0.012194337 | 0           | 6.43501E-05 | 0.00032175  |
| 0.031081081 | 0           | 0           | 3.2175E-05  |
| 0.016505792 | 9.65251E-05 | 0           | 0.0003861   |
| 0.048391248 | 0           | 0           | 3.2175E-05  |
| 0.032464607 | 0           | 0           | 0           |
| 0.032496782 | 0           | 0           | 3.2175E-05  |
| 0.03957529  | 0.000353925 | 0           | 0           |
| 0.003925354 | 0           | 0           | 0           |
| 0.06534749  | 0           | 0           | 0           |
| 0.017567568 | 0.000707851 | 0           | 0           |
| 0.01489704  | 0           | 0           | 0           |
| 0.013899614 | 0           | 0           | 0           |
| 0.062129987 | 9.65251E-05 | 0.000933076 | 0           |
| 0.065701416 | 0           | 0           | 0           |
| 0.025032175 | 0           | 0           | 0           |
| 0.047619048 | 0           | 0.000804376 | 0           |
| 0.014929215 | 0           | 0           | 0           |
| 0.035521236 | 0           | 0           | 0           |
| 0.028861004 | 0           | 0           | 0           |
| 0.04041184  | 9.65251E-05 | 3.2175E-05  | 0           |
| 0.007915058 | 0           | 0           | 0           |
| 0.040572716 | 0.0002574   | 0           | 0           |
| 0.07992278  | 0.000160875 | 0           | 6.43501E-05 |
| 0.018275418 | 9.65251E-05 | 3.2175E-05  | 0           |
| 0.021267696 | 0.0001287   | 0           | 0           |
| 0.020817246 | 0.000160875 | 9.65251E-05 | 3.2175E-05  |
| 0.041119691 | 0           | 0           | 0           |
| 0.075032175 | 0           | 0           | 0           |
| 0.07007722  | 0           | 0           | 0           |
| 0.061808237 | 0           | 0           | 0           |
| 0.027380952 | 0           | 0           | 0           |
| 0.095592021 | 0           | 0           | 0           |

|             |             |            |             |
|-------------|-------------|------------|-------------|
| 0.015637066 | 0           | 0          | 0           |
| 0.002574003 | 0           | 0          | 0.000772201 |
| 0.005759331 | 0           | 0          | 0.054247104 |
| 0.058622909 | 3.2175E-05  | 0          | 3.2175E-05  |
| 0.063577864 | 0.001158301 | 0          | 0           |
| 0.018951094 | 0.000546976 | 0          | 0           |
| 0.056145431 | 0.000289575 | 0          | 0           |
| 0.069980695 | 0           | 0          | 0           |
| 0.033108108 | 0           | 0          | 0           |
| 0.028925354 | 3.2175E-05  | 0          | 0           |
| 0.052670528 | 3.2175E-05  | 0          | 0           |
| 0.029568855 | 0           | 3.2175E-05 | 0           |
| 0.052059202 | 0.006338481 | 0          | 0           |
| 0.074967825 | 3.2175E-05  | 0          | 0           |
| 0.598519949 | 0           | 0          | 0           |
| 0.137741313 | 0           | 0          | 0           |
| 0.042181467 | 0           | 0          | 0           |
| 0.044594595 | 0           | 0          | 0           |
| 0.008751609 | 0           | 0          | 0           |
| 0.061357786 | 0           | 0          | 0           |
| 0.029021879 | 0           | 0          | 0.01029601  |
| 0.037129987 | 0           | 0          | 0           |
| 0.113931789 | 3.2175E-05  | 0          | 0           |
| 0.043886744 | 0           | 0          | 0           |
| 0.022232947 | 0.00019305  | 0          | 0           |
| 0.017599743 | 0           | 0          | 0           |
| 0.023584299 | 0           | 0          | 0.003667954 |
| 0.065122265 | 0           | 0          | 0           |
| 0.025804376 | 0           | 0          | 0           |
| 0.011808237 | 3.2175E-05  | 0          | 0           |
| 0.010682111 | 3.2175E-05  | 0          | 0           |
| 0.027059202 | 0           | 0          | 6.43501E-05 |
| 0.114864865 | 0           | 0          | 0           |
| 0.045431145 | 0           | 0          | 0           |



|             |             |             |             |
|-------------|-------------|-------------|-------------|
| 0.047779923 | 0.0003861   | 0           | 0           |
| 0.016698842 | 0           | 0           | 0.002413127 |
| 0.00965251  | 0           | 0.000160875 | 0           |
| 0.05511583  | 0           | 0           | 0.000418275 |
| 0.012580438 | 3.2175E-05  | 0.000997426 | 0.0001287   |
| 0.103507079 | 3.2175E-05  | 0           | 3.2175E-05  |
| 0.031145431 | 0           | 0           | 0           |
| 0.017052767 | 0.00019305  | 0           | 0           |
| 0.007432432 | 0           | 0           | 0           |
| 0.076319176 | 9.65251E-05 | 0           | 0           |
| 0.021203346 | 0.00019305  | 0           | 0.000225225 |
| 0.076544402 | 3.2175E-05  | 0           | 0           |
| 0.026061776 | 0.000418275 | 0           | 0.005405405 |
| 0.034877735 | 0           | 0           | 9.65251E-05 |
| 0.012998713 | 0           | 0.00032175  | 0           |
| 0.026158301 | 6.43501E-05 | 0           | 0           |
| 0.016988417 | 3.2175E-05  | 0           | 0           |
| 0.028925354 | 0           | 0           | 0           |
| 0.062709138 | 0           | 0           | 0           |
| 0.035939511 | 0.000225225 | 3.2175E-05  | 0           |
| 0.022619048 | 0           | 0           | 0           |
| 0.013642214 | 0.0001287   | 0           | 3.2175E-05  |
| 0.047651223 | 0           | 0           | 0           |
| 0.031853282 | 0           | 0           | 3.2175E-05  |
| 0.039189189 | 9.65251E-05 | 0           | 0           |
| 0.036100386 | 3.2175E-05  | 0           | 9.65251E-05 |
| 0.042599743 | 0           | 0           | 0           |
| 0.03471686  | 0           | 0           | 0           |
| 0.014382239 | 0           | 0           | 3.2175E-05  |
| 0.021492921 | 0           | 0           | 0           |
| 0.012902188 | 0           | 0           | 0.000482625 |
| 0.046299871 | 0           | 0           | 3.2175E-05  |
| 0.032850708 | 3.2175E-05  | 0           | 0           |
| 0.011100386 | 0           | 0           | 3.2175E-05  |

|             |   |   |            |
|-------------|---|---|------------|
| 0.038030888 | 0 | 0 | 3.2175E-05 |
| 0.053925354 | 0 | 0 | 0          |

---

**Supplementary Table 6** The relative abundance of top bacterial genus taxa among healthy and PCOS pateints

| sample | Bacteroides | Faecalibacterium | Prevotella | Roseburia | uniflagellatus | Lachnospira | Blautia  | Megamonas | Lachnoclostridium | Lachnospira | Subdoligranella | Prevotella | Escherichia | Ruminococcus |
|--------|-------------|------------------|------------|-----------|----------------|-------------|----------|-----------|-------------------|-------------|-----------------|------------|-------------|--------------|
| N1     | 0.479858    | 0.097619         | 0          | 0.092181  | 0.030373       | 0.009266    | 0        | 0.012516  | 0.013514          | 0.006821    | 0               | 0.028411   | 0.019916    |              |
| N2     | 0.146622    | 0.076094         | 3.22E-05   | 0.026802  | 0.097941       | 0.010264    | 0        | 0.01036   | 0.014125          | 0.028958    | 6.44E-05        | 0.002252   | 0.016602    |              |
| N3     | 0.02101     | 0.066152         | 0.520978   | 0.066216  | 0.023938       | 0.010103    | 0        | 0.008076  | 0.002574          | 0.002928    | 0.069015        | 0.002091   | 0.001866    |              |
| N4     | 0.232432    | 0.192149         | 0.000193   | 0.173488  | 0.049196       | 0.049968    | 0.022201 | 0.006853  | 0.016795          | 0.030277    | 0               | 0.001577   | 0.007979    |              |
| N5     | 0.514511    | 0.088417         | 6.44E-05   | 0.072716  | 0.070721       | 0.052156    | 3.22E-05 | 0.009202  | 0.012484          | 0.005277    | 0               | 0.00666    | 0.001416    |              |
| N6     | 0.275225    | 0.045335         | 3.22E-05   | 0.138771  | 0.046236       | 0.065605    | 3.22E-05 | 0.050354  | 0.016216          | 0.000129    | 3.22E-05        | 0.004762   | 0.017503    |              |
| N7     | 0.083366    | 0.205598         | 0.002284   | 0.090347  | 0.073938       | 0.072233    | 0.000322 | 0.002606  | 0.005985          | 0.058269    | 9.65E-05        | 0.005952   | 0.01583     |              |
| N8     | 0.036165    | 0.123327         | 0.262548   | 0.057625  | 0.029955       | 0.012516    | 0.026158 | 0.008977  | 0.004215          | 0.014704    | 0.018565        | 0.002188   | 0.002349    |              |
| N10    | 0.102542    | 0.083301         | 9.65E-05   | 0.187902  | 0.033398       | 0.035071    | 0.08462  | 0.009846  | 0.052606          | 0.014093    | 0.158945        | 3.22E-05   | 0.0139      |              |
| N11    | 0.055245    | 0.052091         | 0.011744   | 0.032014  | 0.067728       | 0.097072    | 0.010843 | 0.000386  | 0.011454          | 0.053121    | 0               | 0.00029    | 0.012773    |              |
| N12    | 0.380084    | 0.137645         | 6.44E-05   | 0.049356  | 0.156306       | 0.032754    | 0.034427 | 0.027349  | 0.016731          | 0.0037      | 0               | 0.025161   | 0.016023    |              |
| N14    | 0.231918    | 0.069852         | 0.318468   | 0.007304  | 0.024614       | 0.008494    | 0.149517 | 0.05843   | 0.000869          | 0.010489    | 0               | 0.00769    | 0.002896    |              |
| N15    | 0.043919    | 0.235328         | 0.000193   | 0.044562  | 0.118275       | 0.035039    | 0.00074  | 0.005824  | 0.00296           | 0.103185    | 0.003443        | 0.002252   | 0.009524    |              |
| N16    | 0.028314    | 0.195753         | 0.288031   | 0.037934  | 0.032272       | 0.013449    | 0        | 0.013803  | 0.01464           | 0.012709    | 0.090444        | 0.000547   | 0.003604    |              |
| N17    | 0.350515    | 0.108752         | 0.000772   | 0.102864  | 0.055212       | 0.014607    | 0.000322 | 0.012838  | 0.003829          | 0.057432    | 0.000772        | 0.00074    | 0.040541    |              |
| N18    | 0.011712    | 0.066248         | 0.462291   | 0.040058  | 0.037484       | 0.007947    | 0.126737 | 0.0176    | 0.02899           | 0.007722    | 0.020592        | 9.65E-05   | 0.00251     |              |
| N19    | 0.170753    | 0.248166         | 3.22E-05   | 0.052671  | 0.033237       | 0.034427    | 0.021107 | 0.006435  | 0.005438          | 0.03668     | 0               | 0.000418   | 0.006982    |              |
| N20    | 0.294112    | 0.086486         | 0.000161   | 0.030727  | 0.068404       | 0.035586    | 0        | 0.00843   | 0.033526          | 0.099807    | 0               | 0.000547   | 0.028958    |              |
| N21    | 0.324839    | 0.116441         | 0          | 0.013514  | 0.079344       | 0.024743    | 0        | 0.016474  | 0.020721          | 0.022748    | 6.44E-05        | 0.00769    | 0.018951    |              |
| N22    | 0.387066    | 0.090959         | 9.65E-05   | 0.026062  | 0.008848       | 0.016345    | 0.038127 | 0.009395  | 0.032754          | 0.000515    | 0.117696        | 0.006017   | 0.006178    |              |
| N23    | 0.454826    | 0.219884         | 0.000161   | 0.076351  | 0.027767       | 0.025161    | 0        | 0.015734  | 0.002059          | 0.025772    | 0               | 0.000483   | 0.012934    |              |
| N24    | 0.520882    | 0.077284         | 0.00074    | 0.031532  | 0.058366       | 0.024453    | 3.22E-05 | 0.033816  | 0                 | 0.002156    | 3.22E-05        | 0.005792   | 0.038546    |              |
| N26    | 0.042503    | 0.084813         | 0.611068   | 0.055631  | 0.017214       | 0.009009    | 0.014093 | 0.007046  | 0.008848          | 0.006371    | 0               | 0.000547   | 0.002606    |              |
| N27    | 0.527864    | 0.000161         | 0.000965   | 0.02545   | 0.071718       | 0.019466    | 0        | 0.066313  | 0.011229          | 0.005985    | 0               | 0.002284   | 0.034781    |              |
| N28    | 0.188835    | 0.12455          | 0.002188   | 0.085811  | 0.134395       | 0.078861    | 6.44E-05 | 0.036197  | 0.013642          | 0.025161    | 0               | 6.44E-05   | 0.019852    |              |
| N29    | 0.069337    | 0.050225         | 0.596686   | 0.025515  | 0.019627       | 0.00991     | 0.041988 | 0.013353  | 0.005309          | 0.017986    | 0.000322        | 0.000257   | 0.011197    |              |
| N30    | 0.270817    | 0.179665         | 0          | 0.149485  | 0.032883       | 0.015412    | 9.65E-05 | 0.014994  | 0.03536           | 0.000418    | 0.000354        | 0.012613   | 0.010039    |              |
| N31    | 0.079762    | 0.122362         | 0.16908    | 0.067117  | 0.066892       | 0.031435    | 0.028378 | 0.015573  | 0.069048          | 0.013127    | 0               | 0.007079   | 0.016377    |              |
| N32    | 0.331982    | 0.134588         | 0.000225   | 0.032851  | 0.019788       | 0.049517    | 0.076287 | 0.008977  | 0.017728          | 0.006178    | 0               | 0.008333   | 0.018275    |              |
| N33    | 0.154376    | 0.083172         | 0.01316    | 0.013127  | 0.0287         | 0.13594     | 3.22E-05 | 0.006403  | 0.001737          | 0.029215    | 3.22E-05        | 0.001126   | 0.012098    |              |
| N34    | 0.115283    | 0.073584         | 0.505341   | 0.036229  | 0.054665       | 0.015122    | 3.22E-05 | 0.02204   | 0.002156          | 0.013674    | 0.000193        | 0.001512   | 0.007304    |              |
| N35    | 0.330631    | 0.041892         | 0.001126   | 0.112902  | 0.071525       | 0.027124    | 6.44E-05 | 0.025257  | 0.033655          | 0.000515    | 3.22E-05        | 0.000354   | 0.000515    |              |
| N36    | 0.31258     | 0.117696         | 3.22E-05   | 0.017375  | 0.06657        | 0.027124    | 3.22E-05 | 0.022844  | 0.035039          | 0.067857    | 0               | 0.002574   | 0.010071    |              |
| N37    | 0.194273    | 0.086358         | 6.44E-05   | 0.085296  | 0.07722        | 0.084556    | 0.028925 | 0.009331  | 0.004923          | 0.065766    | 3.22E-05        | 0.004569   | 0.0139      |              |
| N38    | 0.139736    | 0.062033         | 0.288063   | 0.07471   | 0.043147       | 0.034073    | 3.22E-05 | 0.012999  | 0.01242           | 0.009556    | 0.037516        | 9.65E-05   | 0.01583     |              |
| N39    | 0.193115    | 0.140347         | 0.001094   | 0.144691  | 0.050901       | 0.054569    | 0        | 0.00769   | 0.008333          | 0.017439    | 9.65E-05        | 0.000804   | 0.013353    |              |

|      |          |          |          |          |          |          |          |          |          |          |          |          |          |
|------|----------|----------|----------|----------|----------|----------|----------|----------|----------|----------|----------|----------|----------|
| N40  | 0.105438 | 0.066474 | 0.514414 | 0.067149 | 0.026931 | 0.010553 | 0.016409 | 0.007851 | 0.004472 | 0.02426  | 0        | 0.008269 | 0.001898 |
| N41  | 0.326416 | 0.148166 | 0.008269 | 0.073263 | 0.086422 | 0.019916 | 0.000161 | 0.023102 | 0.016055 | 0.010521 | 0        | 0.00029  | 0.010006 |
| P001 | 0.41509  | 0.109556 | 0        | 0.091216 | 0.091763 | 0.015058 | 0        | 0.029279 | 0.022072 | 0.000676 | 0        | 9.65E-05 | 0.008269 |
| P002 | 0.415154 | 0.040283 | 0        | 0.052091 | 0.042921 | 0.023069 | 0        | 0.092246 | 0.021107 | 0.010618 | 0        | 0.021686 | 0.023166 |
| P003 | 0.341538 | 0.088063 | 0        | 0.196364 | 0.016184 | 0.015959 | 0        | 0.035457 | 0.022748 | 0.008398 | 0        | 0.013031 | 0.007883 |
| P004 | 0.103443 | 0.139897 | 0        | 0.026448 | 0.065862 | 0.027671 | 0        | 0.01213  | 0        | 3.22E-05 | 0        | 0.002091 | 0.022716 |
| P005 | 0.208205 | 0.082625 | 0.071589 | 0.046654 | 0.068115 | 0.02056  | 0        | 0.076287 | 0.050837 | 0.003443 | 0        | 0.026416 | 0.03565  |
| P006 | 0.140026 | 0.114093 | 0        | 0.027252 | 0.044337 | 0.049421 | 0        | 0.006371 | 0.047651 | 0.039736 | 0.011165 | 0.000933 | 0.012677 |
| P007 | 0.115058 | 0.011068 | 0.000193 | 0.086486 | 0.176673 | 0.008366 | 0.155373 | 0.013417 | 0.022555 | 0.000161 | 0.279344 | 0.001931 | 0.041023 |
| P008 | 0.253282 | 0.14601  | 0        | 0.126995 | 0.148069 | 0.035746 | 0        | 0.008752 | 0.018951 | 0.00029  | 0        | 0.001158 | 0.012838 |
| P009 | 0.322233 | 0.094015 | 0        | 0.03639  | 0.05917  | 0.01509  | 0        | 0.023391 | 0.010586 | 0.02545  | 0        | 0.014414 | 0.021686 |
| P010 | 0.490508 | 0.050901 | 0        | 0.026834 | 0.057529 | 0.007979 | 0        | 0.01686  | 0.002896 | 0.000418 | 0        | 0.004054 | 0.04157  |
| P012 | 0.263578 | 0.121976 | 0        | 0.044208 | 0.055051 | 0.118758 | 0        | 0.01657  | 0.02899  | 0.000515 | 0        | 6.44E-05 | 0.025322 |
| P013 | 0.318533 | 0.052252 | 0        | 0.139897 | 0.057465 | 0.022104 | 0.01435  | 0.007786 | 0.05045  | 0.016023 | 0        | 0.015412 | 0.005985 |
| P014 | 0.343082 | 0.061229 | 0        | 0.043179 | 0.050997 | 0.03742  | 0        | 0.002864 | 0.016441 | 0.020045 | 0        | 0.002124 | 0.018533 |
| P015 | 0.398456 | 0.108108 | 0        | 0.038417 | 0.064414 | 0.009781 | 0        | 0.013932 | 0.037999 | 0.007722 | 0        | 0.001641 | 0.026995 |
| P016 | 0.127477 | 0.176963 | 0.236068 | 0.072587 | 0.071976 | 0.022136 | 0        | 0.017246 | 0.019337 | 0.014607 | 0        | 0.00518  | 0.022716 |
| P017 | 0.084813 | 0.084234 | 0.138192 | 0.086229 | 0.064865 | 0.025933 | 0        | 0.007336 | 0.002992 | 0.010875 | 0.095238 | 0.002638 | 0.005631 |
| P018 | 0.426384 | 0.040959 | 0        | 0.023198 | 0.0426   | 0.021139 | 0.106274 | 0.029086 | 0.004183 | 0.013127 | 0        | 0.001255 | 0.021171 |
| P019 | 0.116441 | 0.091377 | 0        | 0.057819 | 0.069562 | 0.024131 | 3.22E-05 | 0.011551 | 0.023069 | 0.020109 | 0        | 0.000708 | 0.017181 |
| P020 | 0.453443 | 0.05769  | 0        | 0.07249  | 0.028636 | 0.019015 | 0        | 0.021171 | 0.005212 | 0.009299 | 0        | 0.008205 | 0.036486 |
| P021 | 0.077188 | 0.06332  | 0.471107 | 0.043662 | 0.047265 | 0.012033 | 0.017471 | 0.013256 | 0.002735 | 0.030277 | 0.012613 | 6.44E-05 | 0.006918 |
| P022 | 0.43536  | 0.089768 | 0        | 0.094562 | 0.02529  | 0.015444 | 0        | 0.011873 | 0.040122 | 0.010586 | 0        | 3.22E-05 | 0.005952 |
| P023 | 0.417825 | 0.044273 | 0        | 0.018565 | 0.017696 | 0.024099 | 0.000611 | 0.011583 | 0.010039 | 0.019048 | 0        | 0.000193 | 0.013932 |
| P024 | 0.212194 | 0.138514 | 0.166795 | 0.072458 | 0.075869 | 0.027864 | 0.021107 | 0.016023 | 0.027606 | 0.014157 | 0        | 0.018533 | 0.018436 |
| P025 | 0.256017 | 0.067342 | 0.40695  | 0.007722 | 0.01287  | 0.023874 | 0        | 0.011744 | 0.026158 | 0.00045  | 0        | 0.014447 | 0.006596 |
| P026 | 0.719112 | 0.001223 | 0        | 0.000515 | 0.042793 | 0.010907 | 0        | 0.034073 | 0        | 9.65E-05 | 0        | 0.056853 | 0.001737 |
| P027 | 0.371782 | 0.010457 | 0        | 0.033977 | 0.157819 | 0.041602 | 0        | 0.039028 | 0.038063 | 0.000257 | 0        | 0.028218 | 0.00592  |
| P028 | 0.471364 | 0.084685 | 0        | 0.01435  | 0.063031 | 0.018597 | 0        | 0.012452 | 0.033559 | 0.042696 | 0        | 0.000322 | 0.013578 |
| P030 | 0.254569 | 0.092921 | 0        | 0.168082 | 0.067149 | 0.017921 | 0        | 0.034106 | 0.048423 | 0.001416 | 0        | 0.002284 | 0.034041 |
| P031 | 0.145206 | 0.13964  | 0.204923 | 0.064221 | 0.03713  | 0.018726 | 0        | 0.005534 | 0.011293 | 0.009106 | 0        | 0.001512 | 0.020463 |
| P033 | 0.011873 | 0.000257 | 0.000257 | 0.00029  | 0.162967 | 0.000676 | 3.22E-05 | 0.022362 | 0.000129 | 6.44E-05 | 0        | 0.00103  | 0        |
| P034 | 0.016634 | 0        | 0        | 0.000129 | 0.061647 | 0.000193 | 0        | 0.012323 | 0        | 0        | 0        | 0        | 0        |
| P035 | 0.317825 | 0.09334  | 0        | 0.154022 | 0.046139 | 0.007819 | 0.069659 | 0.008687 | 0.001609 | 0.010296 | 0        | 0.052896 | 0.007593 |
| P036 | 0.259685 | 0.127831 | 0        | 0.0639   | 0.069144 | 0.018468 | 0.059073 | 0.017728 | 0.018629 | 0.022233 | 0        | 0.053475 | 0.012967 |
| P037 | 0.510586 | 0.060489 | 0        | 0.084138 | 0.014607 | 0.015991 | 0.003346 | 0.013256 | 0.011551 | 0.005631 | 0        | 0        | 0.008494 |
| P038 | 0.222362 | 0.065315 | 0        | 0.066763 | 0.040026 | 0.024775 | 0.119788 | 0.013353 | 0.024228 | 0.010167 | 0        | 0.010393 | 0.005309 |
| P039 | 0.172587 | 0.135843 | 0.000129 | 0.054601 | 0.109073 | 0.118115 | 0        | 0.009331 | 0.042214 | 0.002703 | 3.22E-05 | 0.016281 | 0.012291 |

|      |          |          |          |          |          |          |          |          |          |          |          |          |          |
|------|----------|----------|----------|----------|----------|----------|----------|----------|----------|----------|----------|----------|----------|
| P040 | 0.585135 | 0.047587 | 0        | 0.062452 | 0.047233 | 0.023005 | 0.011133 | 0.025032 | 0.016538 | 0.004344 | 0        | 0.010811 | 0.013031 |
| P041 | 0.099003 | 0.144562 | 0        | 0.096107 | 0.045785 | 0.00962  | 0.011004 | 0.010618 | 0.029601 | 0.025644 | 0.250354 | 0.001705 | 0.023295 |
| P042 | 0.280277 | 0.125804 | 0        | 0.059202 | 0.079311 | 0.019723 | 0        | 0.022523 | 0.040026 | 0.017471 | 0        | 0.007336 | 0.034202 |
| P043 | 0.244144 | 0.03742  | 0        | 0.09971  | 0.028732 | 0.007175 | 0        | 0.027188 | 0.010843 | 0.01139  | 0.126963 | 0.002413 | 0.006692 |
| P044 | 0.23816  | 0.011905 | 0        | 0.041634 | 0.062967 | 0.017149 | 0.020753 | 0.026866 | 0.032947 | 0.042535 | 3.22E-05 | 0.008687 | 0.093179 |
| P045 | 0.179569 | 0.007432 | 0.187066 | 0.006853 | 0.033591 | 0.004344 | 0.101802 | 0.043822 | 0.010039 | 0.003443 | 0        | 0.058076 | 0.009266 |
| P046 | 0.261712 | 0.000193 | 0        | 9.65E-05 | 0.002671 | 0.00119  | 0.08639  | 0.00103  | 0        | 0.000483 | 0        | 0.578411 | 0.000515 |
| P047 | 0.136551 | 0        | 0        | 0.147265 | 0.090283 | 0.067632 | 0        | 0.013964 | 0.028218 | 0        | 0        | 0.043243 | 0.009459 |
| P048 | 0.422362 | 0.067889 | 0        | 0.048584 | 0.045753 | 0.006564 | 0.014736 | 0.008172 | 0.003764 | 0.01361  | 0        | 0.024099 | 0.039833 |
| P049 | 0.269916 | 0.076866 | 0        | 0.012259 | 0.041956 | 0.038674 | 0        | 0.019241 | 0.00769  | 0.040894 | 0        | 0.00222  | 0.006789 |
| P050 | 0.734717 | 0        | 0        | 0.003636 | 0.012709 | 0.01657  | 0        | 0.012227 | 0.001609 | 0.000354 | 0        | 0.008044 | 0.030952 |
| P051 | 0.171782 | 0.029762 | 0        | 0.104633 | 0.020109 | 0.005888 | 0        | 0.008333 | 0.078314 | 0.002477 | 0        | 0.032722 | 0.003121 |
| P052 | 0.253797 | 0.140766 | 0.11036  | 0.017246 | 0.03861  | 0.00518  | 0.074421 | 0.03935  | 0.053764 | 0.001384 | 0        | 0.000354 | 0.004022 |
| P053 | 0.474839 | 0        | 0        | 0.048295 | 0.028153 | 0.023359 | 0        | 0.037645 | 0.014929 | 0.032625 | 0        | 0.0111   | 0.025804 |
| P054 | 0.026351 | 0.015991 | 0.09601  | 0.000676 | 0.037194 | 0.003378 | 9.65E-05 | 0.043082 | 0.000129 | 0.00045  | 0.061293 | 0.102284 | 0.000257 |
| P056 | 0.552831 | 0.030888 | 0        | 0.060425 | 0.02056  | 0.005566 | 0        | 0.03594  | 0.002188 | 0.000386 | 0.059106 | 0.000161 | 0.002252 |
| P057 | 0.530534 | 0.039093 | 0        | 0.09926  | 0.024003 | 0.01509  | 0        | 0.013674 | 0.012291 | 0.010714 | 0        | 0.002027 | 0.03536  |
| P058 | 0.330502 | 0.194949 | 0        | 0.067889 | 0.09186  | 0.009363 | 9.65E-05 | 0.017407 | 0.027252 | 0.03269  | 0        | 0        | 0.006596 |
| P059 | 0.458076 | 0.019852 | 0        | 0.109653 | 0.019852 | 0.002317 | 0.032207 | 0.019595 | 0.021107 | 0.024196 | 0        | 0.002124 | 0.008848 |
| P060 | 0.393951 | 0.048327 | 0        | 0.067568 | 0.054151 | 0.007304 | 6.44E-05 | 0.027671 | 0.024356 | 0.003185 | 0.123391 | 0.003958 | 0.009138 |
| P061 | 0.264189 | 0.228539 | 0        | 0.061358 | 0.064961 | 0.035296 | 0.053089 | 0.003378 | 0.017728 | 0.027831 | 0        | 0.004665 | 0.02278  |
| P062 | 0.11731  | 0.192181 | 0.029118 | 0.123552 | 0.066795 | 0.05917  | 0        | 0.010521 | 0.006853 | 0.016506 | 0.003539 | 0        | 0.012484 |
| P063 | 0.234749 | 0.177542 | 0        | 0.075386 | 0.090283 | 0.067632 | 0        | 0.007658 | 0.038867 | 0.00769  | 6.44E-05 | 0.0074   | 0.014414 |
| P064 | 0.155727 | 0.131918 | 0        | 0.068308 | 0.064768 | 0.012709 | 0        | 0.01094  | 0.019048 | 0.035071 | 0.064157 | 3.22E-05 | 0.007883 |
| P065 | 0.358977 | 9.65E-05 | 0        | 0.121815 | 0.001384 | 0.101737 | 0        | 0.063642 | 0.023423 | 0        | 0        | 0.056274 | 0.000129 |
| P066 | 0.201737 | 0.036583 | 0.021332 | 0.105148 | 0.116699 | 0.080277 | 0.021589 | 0.031403 | 0.028893 | 0.007915 | 0        | 0.020463 | 0.019788 |
| P067 | 0.42397  | 0.200515 | 3.22E-05 | 0.058462 | 0.03861  | 0.017407 | 0        | 0.032304 | 0.032014 | 0.000354 | 3.22E-05 | 0.008494 | 0.001673 |
| P068 | 0.470753 | 0.108623 | 9.65E-05 | 0.128732 | 0.020753 | 0.012645 | 0        | 0.006757 | 0.009685 | 0.006918 | 0        | 0.003089 | 0.017889 |
| P069 | 0.127284 | 0.106692 | 3.22E-05 | 0.11406  | 0.096171 | 0.08964  | 6.44E-05 | 0.000644 | 0.009299 | 0.043147 | 0        | 0.000933 | 0.009781 |
| P070 | 0.359138 | 0.13906  | 6.44E-05 | 0.040476 | 0.060328 | 0.02751  | 0        | 0.016795 | 0.02397  | 9.65E-05 | 0        | 0.007883 | 0.001351 |
| P071 | 0.222523 | 0.147104 | 3.22E-05 | 0.020045 | 0.072748 | 0.034653 | 3.22E-05 | 0.000869 | 0.002349 | 0.062613 | 0        | 0.002992 | 0.006725 |
| P072 | 0.041956 | 0.137741 | 3.22E-05 | 0.115219 | 0.064479 | 0.088449 | 3.22E-05 | 0.015734 | 0.044305 | 0.016377 | 3.22E-05 | 0.001319 | 0.000225 |
| P073 | 0.356853 | 0.171943 | 3.22E-05 | 0.018983 | 0.042375 | 0.016345 | 0.069402 | 0.050611 | 0.035264 | 0.00045  | 0        | 0.006178 | 0.002542 |
| P074 | 0.213353 | 0.048359 | 0.000129 | 0.120849 | 0.092696 | 0.087387 | 3.22E-05 | 0.033784 | 0.035264 | 0.018694 | 0        | 0.002381 | 0.009266 |
| P075 | 0.450837 | 0.102864 | 3.22E-05 | 0.03121  | 0.046396 | 0.044176 | 3.22E-05 | 0.004376 | 0.015605 | 0.026351 | 0        | 0.001448 | 0.024389 |
| P076 | 0.033301 | 0.06908  | 0.308784 | 0.008848 | 0.025644 | 0.008076 | 0.020689 | 0.031049 | 0.000386 | 0.020753 | 0.04379  | 0.03388  | 0.007786 |
| P077 | 0.159524 | 0.159106 | 0.099743 | 0.11332  | 0.040927 | 0.019627 | 9.65E-05 | 0.012484 | 0.015766 | 0.025064 | 0        | 0.003507 | 0.019981 |
| P078 | 0.20666  | 0.167761 | 0.039447 | 0.01538  | 0.057143 | 0.017439 | 0.001866 | 0.00769  | 0.0037   | 0.02056  | 0        | 0.065573 | 0.008398 |

|      |          |          |          |          |          |          |          |          |          |          |          |          |          |
|------|----------|----------|----------|----------|----------|----------|----------|----------|----------|----------|----------|----------|----------|
| P079 | 0.097651 | 0.037194 | 6.44E-05 | 0.018082 | 0.046911 | 0.018179 | 0        | 0.010425 | 0.007207 | 0.075644 | 0        | 0.005695 | 0.029022 |
| P080 | 0.306338 | 0.204858 | 6.44E-05 | 0.039897 | 0.106242 | 0.040026 | 3.22E-05 | 0.006885 | 0.006435 | 0.011615 | 0        | 0.000354 | 0.010875 |
| P081 | 0.282658 | 0.16657  | 3.22E-05 | 0.075    | 0.045528 | 0.022265 | 0.060714 | 0.013642 | 0.025515 | 0.028346 | 0        | 0.000129 | 0.008816 |
| P082 | 0.164479 | 0.178089 | 3.22E-05 | 0.106371 | 0.061937 | 0.047104 | 0        | 0.022716 | 0.089704 | 0.00029  | 0        | 0.005792 | 0.024646 |
| P083 | 0.09881  | 0.05     | 0.436133 | 0.03832  | 0.025611 | 0.005019 | 0.078507 | 0.029311 | 0.035071 | 0.002317 | 0.070463 | 0.00843  | 0.018694 |
| P084 | 0.02352  | 0.053346 | 0.53121  | 0.027799 | 0.038771 | 0.005084 | 6.44E-05 | 0.007979 | 0.006596 | 3.22E-05 | 0.144466 | 0.002156 | 0.005084 |
| P085 | 0.376512 | 0.05399  | 0        | 0.055824 | 0.040154 | 0.011776 | 0.104054 | 0.014672 | 0.027059 | 0.000129 | 0.038224 | 0.059459 | 0.006885 |
| P086 | 0.137838 | 0.078153 | 0.252574 | 0.186004 | 0.048777 | 0.009524 | 3.22E-05 | 0.020109 | 0.008172 | 0.016795 | 0        | 0.008784 | 0.007979 |
| P087 | 0.075386 | 0.07796  | 0.000225 | 0.064865 | 0.086615 | 0.053314 | 3.22E-05 | 0.007979 | 0.028861 | 0.013867 | 0        | 0.008977 | 0.003121 |
| P088 | 0.064897 | 0.070045 | 0.525257 | 0.041248 | 0.017825 | 0.011519 | 0.000515 | 0.004505 | 0.00045  | 0.017214 | 6.44E-05 | 0.001737 | 0.002542 |
| P089 | 0.21509  | 0.229054 | 9.65E-05 | 0.040669 | 0.042085 | 0.041699 | 0        | 0.019949 | 0.021042 | 0.027445 | 0        | 0.017535 | 0.006178 |
| P090 | 0.021075 | 0.16332  | 0.435779 | 0.045174 | 0.028829 | 0.008205 | 0.007786 | 0.003346 | 0.009588 | 0.010296 | 0.053571 | 0.010586 | 0.005212 |
| P092 | 0.159202 | 0.088256 | 0.31406  | 0.050129 | 0.035071 | 0.01213  | 9.65E-05 | 0.008398 | 0.020721 | 0.009202 | 0.041377 | 0.00029  | 0.003057 |
| P093 | 0.40177  | 0.079376 | 0.000193 | 0.084813 | 0.038835 | 0.020174 | 0.082851 | 0.028153 | 0.001255 | 0.0037   | 6.44E-05 | 0.005759 | 0.007625 |
| P094 | 0.070817 | 0.101705 | 0.233237 | 0.045592 | 0.023359 | 0.033108 | 0.172683 | 0.017246 | 0.020624 | 0.002317 | 0.000483 | 0.002703 | 0.004247 |
| P095 | 0.016602 | 0.074839 | 0.600772 | 0.026126 | 0.015347 | 0.029633 | 0        | 0.005277 | 0.000161 | 0.003185 | 0.022072 | 0.011712 | 0.006403 |
| P096 | 0.229279 | 0.024743 | 0.151416 | 0.037741 | 0.068404 | 0.00888  | 0.256564 | 0.030695 | 0.001898 | 0.001866 | 0        | 0.004215 | 0.009878 |
| P097 | 0.144048 | 0.098102 | 0.408687 | 0.042439 | 0.032722 | 0.019402 | 0        | 0.041538 | 6.44E-05 | 0.01036  | 0        | 0.004601 | 0.018115 |
| P099 | 0.233172 | 0.13343  | 0.000129 | 0.133655 | 0.038127 | 0.023391 | 0        | 0.007658 | 0.008076 | 0.014672 | 0        | 0.002896 | 0.013256 |
| P100 | 0.32677  | 0.049421 | 0.00074  | 0.021493 | 0.03491  | 0.038127 | 0.163739 | 0.052831 | 0.075676 | 0.002381 | 3.22E-05 | 6.44E-05 | 0.011551 |
| P101 | 0.46361  | 0.118629 | 0.006467 | 0.023713 | 0.038707 | 0.01406  | 0.038385 | 0.036615 | 0.017085 | 0.005598 | 0.000515 | 0.003475 | 0.014961 |
| P102 | 0.026416 | 0.072329 | 0.658526 | 0.017728 | 0.024292 | 0.007465 | 0.029794 | 0.006596 | 0.001802 | 0.003571 | 0.076126 | 0.002799 | 0.001158 |
| P103 | 0.453346 | 0.024131 | 0.007915 | 0.050483 | 0.074324 | 0.045528 | 6.44E-05 | 0.047169 | 0.090315 | 0.001673 | 0.000547 | 0.018629 | 0.013481 |
| P104 | 0.502091 | 0.02455  | 6.44E-05 | 0.030212 | 0.031692 | 0.027928 | 0        | 0.059781 | 0.03861  | 0.000161 | 3.22E-05 | 0.034685 | 0.014575 |

| Ruminococ | Bifidobact | Alistipes | Phascolar | Eubacteriu | Anaerostip | Others   |
|-----------|------------|-----------|-----------|------------|------------|----------|
| 0.02471   | 0.003829   | 0.021461  | 0.008526  | 0.003185   | 0.000644   | 0.147169 |
| 0.000129  | 0.01094    | 0.035521  | 0.009299  | 0.058205   | 0.051705   | 0.404086 |
| 9.65E-05  | 0.004151   | 0.001609  | 0.018855  | 0.003571   | 0.005856   | 0.170914 |
| 9.65E-05  | 0.016988   | 0.017825  | 0.007754  | 0.002671   | 0.000901   | 0.170656 |
| 0.008687  | 3.22E-05   | 0.000804  | 0.006725  | 0.006178   | 0.007883   | 0.136036 |
| 0.015798  | 0.152574   | 3.22E-05  | 0.001223  | 0          | 0.003057   | 0.167085 |
| 0.00029   | 0.074839   | 0.006918  | 0.00695   | 0.023198   | 0.031596   | 0.239382 |
| 3.22E-05  | 3.22E-05   | 0.002799  | 0.020077  | 0.061004   | 0.000515   | 0.316248 |
| 6.44E-05  | 0.008398   | 0.002606  | 0.005598  | 0.016828   | 0.00814    | 0.182014 |
| 0         | 0.027413   | 0.013835  | 0.005405  | 0.069434   | 0.014897   | 0.464254 |
| 0.01464   | 0.001544   | 0.000804  | 0.003443  | 6.44E-05   | 0.002992   | 0.096911 |
| 0.00074   | 0.000901   | 0.007529  | 0.030438  | 0.000257   | 0.001158   | 0.068436 |
| 0.010521  | 0.00029    | 0.003282  | 0.002928  | 0.049968   | 0.015798   | 0.311969 |
| 0.000225  | 0.008366   | 0.001126  | 0.004633  | 0.0074     | 0.004537   | 0.242214 |
| 0.006885  | 0.001094   | 0.007819  | 0.005438  | 0.007336   | 0.002703   | 0.21953  |
| 0         | 0.005019   | 0.000611  | 0.000965  | 0.002574   | 0.000901   | 0.159942 |
| 0.000129  | 0.007432   | 0.010907  | 0.000354  | 0.033752   | 0.009781   | 0.3213   |
| 0.017149  | 0.010489   | 0.00119   | 0.017664  | 0.015669   | 0.037613   | 0.213481 |
| 0.000483  | 0.025193   | 0.022619  | 0.007915  | 0.009266   | 0.011615   | 0.277381 |
| 0.006145  | 0.002574   | 0.001834  | 0.019208  | 0.037548   | 0.000644   | 0.191988 |
| 0.011712  | 0.014318   | 0.000225  | 0.010135  | 0.003057   | 0.002413   | 0.097008 |
| 0.039318  | 6.44E-05   | 0.000869  | 0.03269   | 0          | 0.009234   | 0.124196 |
| 6.44E-05  | 0.000161   | 0.006628  | 0.010972  | 0.006113   | 0.001384   | 0.114929 |
| 0.023777  | 0.000161   | 0.040476  | 0.004923  | 0          | 0.015766   | 0.148681 |
| 0.019048  | 0.008012   | 0.001223  | 0.003893  | 0.000193   | 0.019884   | 0.238127 |
| 9.65E-05  | 0.000676   | 0.007143  | 0.003539  | 0.00592    | 0.002477   | 0.118436 |
| 0.002059  | 0.001931   | 0.013288  | 0.004054  | 0.000933   | 0.001319   | 0.254279 |
| 0.001126  | 0.001448   | 0.004183  | 0.007079  | 0.000644   | 0.013353   | 0.28594  |
| 0.000257  | 0.095592   | 0.006532  | 0.002896  | 0.006435   | 0.006628   | 0.176931 |
| 0.003057  | 0.158462   | 0.011486  | 0.019788  | 0.039221   | 0.069048   | 0.21982  |
| 0.021075  | 0.005212   | 0.000354  | 0.000547  | 0.00222    | 0.004376   | 0.11908  |
| 0.022651  | 0.015862   | 0.001351  | 0.010972  | 0.000193   | 0.053925   | 0.249453 |
| 0.001995  | 0.035296   | 0.005631  | 0.012387  | 0.017921   | 0.032754   | 0.214221 |
| 0.000322  | 0.006274   | 0.013192  | 0.016699  | 0.010843   | 0.011229   | 0.286229 |
| 0.000322  | 0          | 0.00045   | 0.013288  | 0.005502   | 0.008526   | 0.241699 |
| 0.00045   | 0.021686   | 0.010167  | 0.006435  | 0.010071   | 0.038481   | 0.280277 |

|          |          |          |          |          |          |          |
|----------|----------|----------|----------|----------|----------|----------|
| 3.22E-05 | 0.00045  | 0.008301 | 0.008591 | 0.01583  | 0.000676 | 0.112001 |
| 0.002156 | 0.000386 | 0.012516 | 0.008301 | 0.003925 | 0.002799 | 0.247329 |
| 0.003024 | 0.00177  | 0.022072 | 0.019369 | 0.013224 | 0.003282 | 0.154183 |
| 0.125257 | 0        | 0.007625 | 0.011969 | 0        | 0.008012 | 0.104794 |
| 0.001641 | 0.003153 | 0        | 0        | 0.036969 | 0.004987 | 0.207625 |
| 0.108044 | 0.012323 | 0.00045  | 0.001577 | 0        | 0.012387 | 0.464929 |
| 0.050354 | 0.001834 | 0.010071 | 0.052831 | 0.00029  | 0.005727 | 0.188514 |
| 3.22E-05 | 0.01805  | 0.019048 | 0.009073 | 0.011712 | 0.004633 | 0.44379  |
| 0.001416 | 0        | 0        | 0.005084 | 0.000161 | 0.006628 | 0.075064 |
| 0.000869 | 0.009653 | 0        | 0.010779 | 0.052574 | 0.020785 | 0.15325  |
| 0.000193 | 0.005309 | 0.008623 | 0.015605 | 0.003507 | 0.007175 | 0.337162 |
| 0.037291 | 0        | 0        | 0.020367 | 0        | 0.002284 | 0.240508 |
| 0.022748 | 0.007979 | 0        | 0.015862 | 0        | 0.059813 | 0.218565 |
| 9.65E-05 | 0.00045  | 0.036229 | 0.014961 | 0.003829 | 0.001126 | 0.24305  |
| 3.22E-05 | 3.22E-05 | 0.038385 | 0.014254 | 0.005502 | 0.01287  | 0.333012 |
| 0.001094 | 0.004247 | 0.014768 | 0.017342 | 0.002091 | 0.002542 | 0.25045  |
| 0.001834 | 0.001094 | 0.008494 | 0.025032 | 0.005051 | 0.003829 | 0.168372 |
| 0.000322 | 0.000193 | 0.001834 | 0.022169 | 0.030695 | 0.005438 | 0.330373 |
| 0.035232 | 0.00119  | 0.002188 | 0.008398 | 0.000708 | 0.003121 | 0.219788 |
| 0        | 0.001866 | 0.029891 | 0.006853 | 0.001416 | 0.009106 | 0.518887 |
| 0.005888 | 0.011422 | 0.036293 | 0.013707 | 0.010907 | 0.005792 | 0.204344 |
| 3.22E-05 | 0.000161 | 0.009974 | 0.016602 | 0.005759 | 0.004054 | 0.165508 |
| 0.001384 | 0.000515 | 0.03713  | 0.017793 | 0.038288 | 0.004472 | 0.171429 |
| 0.000997 | 0.000547 | 0.038835 | 0.023295 | 0.020013 | 0.0037   | 0.334749 |
| 0.000161 | 0.003539 | 0.011004 | 0.000193 | 0.002703 | 0.001834 | 0.17101  |
| 0.002928 | 0.002124 | 0        | 0.039286 | 0        | 0.005373 | 0.11612  |
| 0.0537   | 6.44E-05 | 0.000193 | 0.029215 | 0        | 0.00177  | 0.047748 |
| 0.080019 | 0        | 0.000257 | 0.017085 | 3.22E-05 | 0.01094  | 0.164543 |
| 0.000708 | 0.001802 | 0.038578 | 0.014994 | 0.004086 | 0.005084 | 0.180116 |
| 0.006306 | 0.001898 | 0.002992 | 0.009878 | 0        | 0.003668 | 0.254344 |
| 0.000161 | 0.006982 | 0.014736 | 0.00029  | 0.001641 | 0.000418 | 0.318018 |
| 0.001577 | 6.44E-05 | 0.068501 | 6.44E-05 | 0.000257 | 6.44E-05 | 0.729537 |
| 0.000483 | 3.22E-05 | 0.039414 | 0        | 0.000418 | 0        | 0.868726 |
| 0.000418 | 6.44E-05 | 0.01065  | 0.005309 | 0.024646 | 0.001705 | 0.187323 |
| 0.033816 | 0.017439 | 0.007529 | 0.007561 | 0.002349 | 0.011326 | 0.196847 |
| 0.016248 | 0.001255 | 0.023842 | 0.009299 | 0.001641 | 0.00843  | 0.211197 |
| 0.009653 | 0.012066 | 0.013578 | 0.006532 | 0.009588 | 0.001512 | 0.344595 |
| 0.028411 | 0.001255 | 6.44E-05 | 0.00045  | 0        | 0.038707 | 0.257915 |



|          |          |          |          |          |          |          |
|----------|----------|----------|----------|----------|----------|----------|
| 0.001384 | 0.00045  | 0.018404 | 0.012548 | 0.002928 | 0.00399  | 0.113996 |
| 0.002349 | 0.010972 | 0.004762 | 0.000322 | 0.030245 | 0.00103  | 0.203024 |
| 0.001963 | 0.007432 | 0.013256 | 0.008044 | 0.001898 | 0.004183 | 0.277349 |
| 0.001834 | 0.006725 | 0.006918 | 0.020335 | 0.009974 | 0.003314 | 0.34823  |
| 0.006564 | 0.000386 | 0.00695  | 0.04157  | 0.003861 | 0.004955 | 0.3389   |
| 0.036133 | 0.00074  | 0.001641 | 0.027091 | 0.000965 | 0.001351 | 0.286776 |
| 0.008559 | 0.001931 | 0.000257 | 0.003861 | 0.00029  | 0        | 0.052413 |
| 0.042053 | 0.018597 | 3.22E-05 | 0.001673 | 0        | 9.65E-05 | 0.400933 |
| 0.019369 | 0.007336 | 0.023198 | 0.012259 | 0.003475 | 0.000579 | 0.238417 |
| 0.001287 | 0.010682 | 0.036808 | 0.02722  | 0.005405 | 0.057658 | 0.344434 |
| 0.058462 | 0.00029  | 0        | 0        | 0        | 0.008172 | 0.112259 |
| 0.033655 | 0.000515 | 0.018468 | 0.003121 | 3.22E-05 | 0.002477 | 0.484588 |
| 0.007207 | 0.004698 | 0.017085 | 0.020624 | 0.003153 | 0.001416 | 0.206564 |
| 0.050708 | 0.004569 | 0.054279 | 0.03417  | 0        | 0.00473  | 0.154794 |
| 0.018308 | 0.007336 | 0.001094 | 0.002767 | 0.000225 | 0.001705 | 0.581371 |
| 0.04675  | 0.001416 | 0.004762 | 0.003443 | 0.000322 | 0.000772 | 0.172233 |
| 0.003571 | 0        | 0.013964 | 0        | 0.002542 | 0.001577 | 0.1963   |
| 6.44E-05 | 0.005116 | 0.006178 | 0.010779 | 0        | 0.003507 | 0.195753 |
| 0.011165 | 0.002445 | 0.027059 | 0.016731 | 0.001931 | 9.65E-05 | 0.222748 |
| 0.000193 | 6.44E-05 | 0.01538  | 0.021236 | 0.000386 | 0.00148  | 0.198198 |
| 0.000547 | 0.001544 | 0.020302 | 0.007658 | 0        | 0.010714 | 0.175418 |
| 0.000257 | 0        | 0.016538 | 0.019176 | 0.048616 | 0.012098 | 0.265283 |
| 0.001544 | 0.04556  | 0.005405 | 0.009459 | 0.019949 | 0.020302 | 0.176094 |
| 0.003346 | 0.017664 | 0.007593 | 0.000869 | 0.016795 | 0.003475 | 0.379698 |
| 0.01332  | 0.067954 | 0.00103  | 0        | 0        | 0.004505 | 0.185714 |
| 0.057851 | 0        | 0.020238 | 0.016634 | 0.003443 | 0.010972 | 0.199035 |
| 0.029215 | 0.000483 | 0        | 0        | 0.004923 | 0.004762 | 0.14675  |
| 0.012066 | 0.001158 | 0.020495 | 0.020142 | 0.0139   | 0.00251  | 0.14379  |
| 0.005727 | 0.025129 | 0.014607 | 0.005373 | 0.022941 | 0.065927 | 0.262548 |
| 0.002992 | 0.040058 | 0.006403 | 0        | 0.03816  | 0.022169 | 0.213546 |
| 0.00621  | 0.046622 | 0.01509  | 0.014994 | 0.025579 | 0.013964 | 0.304858 |
| 0.00888  | 0.033912 | 0.002896 | 0.020689 | 0.020785 | 0.01583  | 0.371107 |
| 0.112677 | 0.000418 | 0.000515 | 0.009717 | 0        | 0.002606 | 0.103089 |
| 0.01834  | 0.000225 | 0.010296 | 0.03092  | 0.017825 | 0.018018 | 0.242181 |
| 0.009717 | 0.002124 | 0.00473  | 0.014414 | 0.035296 | 0.00177  | 0.184234 |
| 0.000225 | 0.003636 | 0.000483 | 0.018468 | 0.006564 | 0.00074  | 0.357819 |
| 0.015508 | 0.002864 | 0.022973 | 0.030084 | 0.03018  | 0.006338 | 0.222909 |
| 0.000386 | 0.017921 | 0.012162 | 0.004537 | 0.06242  | 0.000965 | 0.289994 |

|          |          |          |          |          |          |          |
|----------|----------|----------|----------|----------|----------|----------|
| 0.002703 | 0.023134 | 0.06686  | 0.006242 | 0.091248 | 0.009395 | 0.454344 |
| 6.44E-05 | 0.002638 | 0.006017 | 0.01731  | 0.002606 | 0.007497 | 0.230245 |
| 0.000901 | 0.000997 | 0.014254 | 0.006564 | 0.022104 | 0.009556 | 0.216409 |
| 0.022394 | 0.027381 | 0.000804 | 0.0074   | 0.002477 | 0.022458 | 0.215927 |
| 0.021943 | 0.000161 | 0.004376 | 0.007658 | 0.009138 | 0.000579 | 0.059459 |
| 0.000386 | 0.002059 | 0.000869 | 0        | 0.000193 | 0.010296 | 0.14009  |
| 0.1176   | 0.000997 | 0.002317 | 0.008301 | 0.00045  | 0.003668 | 0.077928 |
| 0.000129 | 0.000193 | 0.023134 | 0.011036 | 0.005502 | 0.001802 | 0.183462 |
| 0.027477 | 0.137387 | 6.44E-05 | 0.00029  | 6.44E-05 | 0.11184  | 0.301673 |
| 9.65E-05 | 0.044691 | 0.023005 | 0.01213  | 0.021139 | 0.000611 | 0.140508 |
| 0.013127 | 0.002124 | 0.024517 | 0.008494 | 3.22E-05 | 0.014414 | 0.276448 |
| 0.001255 | 0.005985 | 0.000644 | 0.00325  | 0.016248 | 0.000997 | 0.168855 |
| 0        | 9.65E-05 | 0.00695  | 0.013578 | 0.009813 | 0.002574 | 0.225    |
| 0.017246 | 0.031178 | 0.011197 | 0.00962  | 0.002059 | 0.00251  | 0.171622 |
| 0.000257 | 0.027445 | 0.000161 | 0.002671 | 3.22E-05 | 0.006532 | 0.234781 |
| 0.00119  | 0        | 0.001126 | 0.039382 | 0.002831 | 0.004826 | 0.138514 |
| 0.012194 | 0.005373 | 0.000225 | 0.004311 | 6.44E-05 | 0.011454 | 0.140798 |
| 0.002445 | 0.000611 | 0.012516 | 0.005116 | 0.015862 | 0.014929 | 0.128443 |
| 9.65E-05 | 0.002349 | 0.014157 | 0.011647 | 0.008752 | 0.030888 | 0.323649 |
| 0.002317 | 0.029279 | 0.002928 | 0.001255 | 0        | 0.008945 | 0.177542 |
| 0.009781 | 0.00029  | 0.017761 | 0.007046 | 0.00325  | 0.001544 | 0.178507 |
| 6.44E-05 | 0.000869 | 0.000547 | 0.007336 | 0.002574 | 0.000322 | 0.059685 |
| 0.0074   | 0.007207 | 0.006532 | 0.011615 | 0.000129 | 0.029022 | 0.110489 |
| 0.060199 | 0.028346 | 0        | 0        | 0        | 0.02381  | 0.123263 |

**Supplementary Table 7** Characteristic bacterial biomarkers screened by LEfSe

| tax        | Sign    | Grou | LDA      | FDR      | Healthy  | m        | PCOS     | me       | Total | mean | N1       | N2       |
|------------|---------|------|----------|----------|----------|----------|----------|----------|-------|------|----------|----------|
| k__Bacteri | Healthy |      | 2.130176 | 0.000247 | 0.015071 | 0.001642 | 0.005394 |          |       |      | 0        | 0.003218 |
| k__Bacteri | Healthy |      | 2.412865 | 0.001164 | 0.008721 | 0        | 0.002437 |          |       |      | 0        | 0.003218 |
| k__Bacteri | Healthy |      | 4.498479 | 0.035188 | 14.17818 | 9.240407 | 10.62008 |          |       |      | 0        | 0.009653 |
| k__Bacteri | Healthy |      | 3.448789 | 0.020213 | 0.49956  | 0.047869 | 0.174076 |          |       |      | 0        | 0        |
| k__Bacteri | Healthy |      | 3.426822 | 0.020213 | 0.49956  | 0.047869 | 0.174076 |          |       |      | 0        | 0        |
| k__Bacteri | PCOS    |      | 3.530532 | 0.043414 | 1.364052 | 1.611411 | 1.542296 |          |       |      | 0        | 0.006435 |
| k__Bacteri | PCOS    |      | 3.508786 | 0.043414 | 1.364052 | 1.611411 | 1.542296 |          |       |      | 0        | 0.006435 |
| k__Bacteri | Healthy |      | 4.455009 | 0.000193 | 12.05463 | 7.298184 | 8.627191 |          |       |      | 0        | 0.003218 |
| k__Bacteri | Healthy |      | 4.468467 | 0.000193 | 12.05463 | 7.298184 | 8.627191 |          |       |      | 0        | 0.003218 |
| k__Bacteri | Healthy |      | 2.614846 | 0.023773 | 0.091614 | 0.020388 | 0.04029  |          |       |      | 0        | 0        |
| k__Bacteri | Healthy |      | 2.643818 | 0.023773 | 0.091614 | 0.020388 | 0.04029  |          |       |      | 0        | 0        |
| k__Bacteri | PCOS    |      | 2.479223 | 0.010573 | 0.000169 | 0.065335 | 0.047127 |          |       |      | 0        | 0        |
| k__Bacteri | Healthy |      | 2.205772 | 0.023841 | 0.03209  | 0.004761 | 0.012397 | 0.34749  |       |      | 0.006435 | 0.006435 |
| k__Bacteri | Healthy |      | 2.162893 | 0.023841 | 0.03209  | 0.004761 | 0.012397 | 0.34749  |       |      | 0.006435 | 0.006435 |
| k__Bacteri | Healthy |      | 2.818002 | 0.005243 | 0.37196  | 0.244005 | 0.279757 |          |       |      | 0        | 0.530888 |
| k__Bacteri | Healthy |      | 2.818002 | 0.005243 | 0.37196  | 0.244005 | 0.279757 |          |       |      | 0        | 0.530888 |
| k__Bacteri | Healthy |      | 3.201637 | 0.034875 | 1.249153 | 0.898242 | 0.99629  | 0.2574   |       |      | 0.563063 | 0.563063 |
| k__Bacteri | Healthy |      | 3.201637 | 0.034875 | 1.249153 | 0.898242 | 0.99629  | 0.2574   |       |      | 0.563063 | 0.563063 |
| k__Bacteri | Healthy |      | 2.215543 | 0.005581 | 0.08374  | 0.046588 | 0.056969 |          |       |      | 0        | 0.093308 |
| k__Bacteri | Healthy |      | 2.214168 | 0.005581 | 0.08374  | 0.046588 | 0.056969 |          |       |      | 0        | 0.093308 |
| k__Bacteri | PCOS    |      | 3.530717 | 0.04063  | 0.132426 | 0.928611 | 0.706147 | 0.083655 |       |      | 0.06435  | 0.06435  |
| k__Bacteri | PCOS    |      | 3.530717 | 0.04063  | 0.132426 | 0.928611 | 0.706147 | 0.083655 |       |      | 0.06435  | 0.06435  |
| k__Bacteri | Healthy |      | 4.337724 | 0.041901 | 21.12189 | 16.39869 | 17.71841 | 15.29601 |       |      | 34.82947 | 34.82947 |
| k__Bacteri | Healthy |      | 4.061515 | 0.042144 | 11.04992 | 8.677147 | 9.340128 | 9.761905 |       |      | 7.609395 | 7.609395 |
| k__Bacteri | Healthy |      | 4.061515 | 0.042144 | 11.04992 | 8.677147 | 9.340128 | 9.761905 |       |      | 7.609395 | 7.609395 |
| k__Bacteri | Healthy |      | 3.445927 | 0.039251 | 1.181755 | 0.542379 | 0.721028 | 1.254826 |       |      | 0.222008 | 0.222008 |
| k__Bacteri | Healthy |      | 3.445927 | 0.039251 | 1.181755 | 0.542379 | 0.721028 | 1.254826 |       |      | 0.222008 | 0.222008 |
| k__Bacteri | Healthy |      | 3.676869 | 0.01059  | 2.398733 | 1.27354  | 1.587932 | 0.682111 |       |      | 2.895753 | 2.895753 |
| k__Bacteri | Healthy |      | 3.676869 | 0.01059  | 2.398733 | 1.27354  | 1.587932 | 0.682111 |       |      | 2.895753 | 2.895753 |
| k__Bacteri | Healthy |      | 2.4145   | 0.03951  | 0.028365 | 0.001182 | 0.008777 | 0.006435 |       |      | 0.019305 | 0.019305 |
| k__Bacteri | Healthy |      | 2.42279  | 0.03951  | 0.028365 | 0.001182 | 0.008777 | 0.006435 |       |      | 0.019305 | 0.019305 |
| k__Bacteri | PCOS    |      | 3.832863 | 0.004122 | 2.818956 | 4.452105 | 3.995784 | 5.823681 |       |      | 2.815315 | 2.815315 |
| k__Bacteri | Healthy |      | 2.93885  | 0.00042  | 0.157996 | 0.025576 | 0.062576 | 0.003218 |       |      | 1.525097 | 1.525097 |
| k__Bacteri | Healthy |      | 3.047869 | 0.000151 | 0.157996 | 0.025477 | 0.062505 | 0.003218 |       |      | 1.525097 | 1.525097 |
| k__Bacteri | Healthy |      | 2.959772 | 0.000151 | 0.157996 | 0.025477 | 0.062505 | 0.003218 |       |      | 1.525097 | 1.525097 |
| k__Bacteri | Healthy |      | 3.515369 | 0.022638 | 0.009483 | 0        | 0.00265  | 0        |       |      | 0        | 0        |
| k__Bacteri | Healthy |      | 3.527483 | 0.022638 | 0.009483 | 0        | 0.00265  | 0        |       |      | 0        | 0        |
| k__Bacteri | Healthy |      | 3.256554 | 0.000268 | 0.141909 | 0        | 0.039651 | 0.003218 |       |      | 1.525097 | 1.525097 |
| k__Bacteri | Healthy |      | 3.250217 | 0.000268 | 0.141909 | 0        | 0.039651 | 0.003218 |       |      | 1.525097 | 1.525097 |
| k__Bacteri | Healthy |      | 2.825139 | 0.00193  | 0.021083 | 0.000263 | 0.00608  | 0        |       |      | 0        | 0        |
| k__Bacteri | Healthy |      | 2.847621 | 0.00193  | 0.021083 | 0.000263 | 0.00608  | 0        |       |      | 0        | 0        |
| k__Bacteri | PCOS    |      | 3.863127 | 0.001089 | 2.357668 | 4.046043 | 3.574291 | 5.553411 |       |      | 0.974904 | 0.974904 |
| k__Bacteri | PCOS    |      | 3.379965 | 0.023668 | 1.207156 | 1.744839 | 1.594604 | 1.074646 |       |      | 0.730373 | 0.730373 |
| k__Bacteri | PCOS    |      | 3.37991  | 0.023668 | 1.207156 | 1.744773 | 1.594557 | 1.074646 |       |      | 0.730373 | 0.730373 |

| N3       | N4       | N5       | N6       | N7       | N8       | N10      | N11      | N12      |   |
|----------|----------|----------|----------|----------|----------|----------|----------|----------|---|
| 0        | 0        | 0        | 0        | 0        | 0        | 0.003218 | 0.022523 | 0.305663 | 0 |
| 0        | 0        | 0        | 0        | 0        | 0        | 0.003218 | 0        | 0.305663 | 0 |
| 61.9305  | 0.595238 | 0.009653 | 0.006435 | 0.254183 | 31.11326 | 16.44466 | 1.644144 | 0.022523 |   |
| 2.931145 | 0        | 0        | 0        | 0.01287  | 3.001931 | 0        | 0        | 0        |   |
| 2.931145 | 0        | 0        | 0        | 0.01287  | 3.001931 | 0        | 0        | 0        |   |
| 6.901544 | 0        | 0        | 0.003218 | 0.009653 | 1.856499 | 15.89447 | 0        | 0        |   |
| 6.901544 | 0        | 0        | 0.003218 | 0.009653 | 1.856499 | 15.89447 | 0        | 0        |   |
| 52.09781 | 0.019305 | 0.006435 | 0.003218 | 0.228443 | 26.25483 | 0.009653 | 1.174389 | 0.006435 |   |
| 52.09781 | 0.019305 | 0.006435 | 0.003218 | 0.228443 | 26.25483 | 0.009653 | 1.174389 | 0.006435 |   |
| 0        | 0        | 0.003218 | 0        | 0        | 0        | 0        | 0.109395 | 0        |   |
| 0        | 0        | 0.003218 | 0        | 0        | 0        | 0        | 0.109395 | 0        |   |
| 0        | 0        | 0        | 0        | 0        | 0        | 0        | 0        | 0        |   |
| 0        | 0        | 0        | 0        | 0.588803 | 0        | 0        | 0.10296  | 0        |   |
| 0        | 0        | 0        | 0        | 0.588803 | 0        | 0        | 0.10296  | 0        |   |
| 0.196268 | 0.083655 | 0.498713 | 0.02574  | 0.341055 | 0.10296  | 0.350708 | 1.270914 | 0.138353 |   |
| 0.196268 | 0.083655 | 0.498713 | 0.02574  | 0.341055 | 0.10296  | 0.350708 | 1.270914 | 0.138353 |   |
| 0.07722  | 0.324968 | 1.608752 | 8.133848 | 1.840412 | 0.279923 | 1.132561 | 3.175676 | 0.537323 |   |
| 0.07722  | 0.324968 | 1.608752 | 8.133848 | 1.840412 | 0.279923 | 1.132561 | 3.175676 | 0.537323 |   |
| 0.035393 | 0.086873 | 0.003218 | 0        | 0.1287   | 0.109395 | 0.225225 | 0.312098 | 0.045045 |   |
| 0.035393 | 0.086873 | 0.003218 | 0        | 0.1287   | 0.109395 | 0.225225 | 0.312098 | 0.045045 |   |
| 0.01287  | 0.096525 | 0.106178 | 0.01287  | 0.170528 | 0.048263 | 0        | 0.350708 | 0.01287  |   |
| 0.01287  | 0.096525 | 0.106178 | 0.01287  | 0.170528 | 0.048263 | 0        | 0.350708 | 0.01287  |   |
| 12.45817 | 26.74389 | 15.14801 | 5.733591 | 38.22716 | 30.99421 | 17.12999 | 34.20849 | 15.59202 |   |
| 6.615187 | 19.21493 | 8.841699 | 4.533462 | 20.55985 | 12.33269 | 8.330116 | 5.209138 | 13.76448 |   |
| 6.615187 | 19.21493 | 8.841699 | 4.533462 | 20.55985 | 12.33269 | 8.330116 | 5.209138 | 13.76448 |   |
| 0.894466 | 0.254183 | 0.009653 | 0        | 4.227799 | 2.393822 | 0.447233 | 0.34749  | 0.06435  |   |
| 0.894466 | 0.254183 | 0.009653 | 0        | 4.227799 | 2.393822 | 0.447233 | 0.34749  | 0.06435  |   |
| 0.292793 | 3.027671 | 0.527671 | 0.01287  | 5.826898 | 1.470399 | 1.409266 | 5.312098 | 0.370013 |   |
| 0.292793 | 3.027671 | 0.527671 | 0.01287  | 5.826898 | 1.470399 | 1.409266 | 5.312098 | 0.370013 |   |
| 0        | 0        | 0        | 0        | 0        | 0        | 0        | 0.009653 | 0        |   |
| 0        | 0        | 0        | 0        | 0        | 0        | 0        | 0.009653 | 0        |   |
| 2.007722 | 1.328829 | 2.068855 | 0.601673 | 1.685972 | 2.323037 | 0.978121 | 0.196268 | 4.263192 |   |
| 0        | 0.01287  | 0        | 0        | 0        | 0        | 0        | 0        | 0        |   |
| 0        | 0.01287  | 0        | 0        | 0        | 0        | 0        | 0        | 0        |   |
| 0        | 0.01287  | 0        | 0        | 0        | 0        | 0        | 0        | 0        |   |
| 0        | 0        | 0        | 0        | 0        | 0        | 0        | 0        | 0        |   |
| 0        | 0        | 0        | 0        | 0        | 0        | 0        | 0        | 0        |   |
| 0        | 0.01287  | 0        | 0        | 0        | 0        | 0        | 0        | 0        |   |
| 0        | 0.01287  | 0        | 0        | 0        | 0        | 0        | 0        | 0        |   |
| 0        | 0        | 0        | 0        | 0        | 0        | 0        | 0.054698 | 0        |   |
| 0        | 0        | 0        | 0        | 0        | 0        | 0        | 0.054698 | 0        |   |
| 1.924067 | 1.126126 | 1.171171 | 0.601673 | 1.563707 | 0.907336 | 0.923423 | 0.109395 | 4.205277 |   |
| 1.673102 | 0.897683 | 0.006435 | 0        | 0.315315 | 0.601673 | 0.891248 | 0.028958 | 1.039254 |   |
| 1.673102 | 0.897683 | 0.006435 | 0        | 0.315315 | 0.601673 | 0.891248 | 0.028958 | 1.039254 |   |

| N14      | N15      | N16      | N17      | N18      | N19      | N20      | N21      | N22      |
|----------|----------|----------|----------|----------|----------|----------|----------|----------|
| 0        | 0        | 0.041828 | 0        | 0.02574  | 0        | 0        | 0.061133 | 0        |
| 0        | 0        | 0        | 0        | 0.019305 | 0        | 0        | 0        | 0        |
| 32.45174 | 0.701416 | 45.38288 | 0.160875 | 52.74775 | 0.392535 | 0.022523 | 0.028958 | 11.77928 |
| 0        | 0        | 7.239382 | 0.003218 | 4.427284 | 0        | 0.003218 | 0        | 0        |
| 0        | 0        | 7.239382 | 0.003218 | 4.427284 | 0        | 0.003218 | 0        | 0        |
| 0        | 0.344273 | 9.044402 | 0.07722  | 2.059202 | 0        | 0        | 0.006435 | 11.76963 |
| 0        | 0.344273 | 9.044402 | 0.07722  | 2.059202 | 0        | 0        | 0.006435 | 11.76963 |
| 31.84685 | 0.019305 | 28.80309 | 0.07722  | 46.22909 | 0.003218 | 0.016088 | 0        | 0.009653 |
| 31.84685 | 0.019305 | 28.80309 | 0.07722  | 46.22909 | 0.003218 | 0.016088 | 0        | 0.009653 |
| 0.006435 | 0.003218 | 0        | 0        | 0.022523 | 0.234878 | 0        | 0        | 0        |
| 0.006435 | 0.003218 | 0        | 0        | 0.022523 | 0.234878 | 0        | 0        | 0        |
| 0        | 0        | 0        | 0        | 0        | 0        | 0        | 0        | 0        |
| 0        | 0.003218 | 0.035393 | 0        | 0        | 0.003218 | 0        | 0        | 0        |
| 0        | 0.003218 | 0.035393 | 0        | 0        | 0.003218 | 0        | 0        | 0        |
| 0.183398 | 0.585586 | 0.534106 | 0.173745 | 0.196268 | 0.508366 | 0.836551 | 0.382883 | 0.173745 |
| 0.183398 | 0.585586 | 0.534106 | 0.173745 | 0.196268 | 0.508366 | 0.836551 | 0.382883 | 0.173745 |
| 0.20592  | 1.042471 | 0.254183 | 1.000644 | 0.209138 | 1.274131 | 2.918275 | 1.393179 | 0.518018 |
| 0.20592  | 1.042471 | 0.254183 | 1.000644 | 0.209138 | 1.274131 | 2.918275 | 1.393179 | 0.518018 |
| 0.009653 | 0.09009  | 0.09009  | 0.006435 | 0.032175 | 0.045045 | 0.209138 | 0.096525 | 0        |
| 0.009653 | 0.09009  | 0.09009  | 0.006435 | 0.032175 | 0.045045 | 0.209138 | 0.096525 | 0        |
| 0        | 0.074003 | 0.019305 | 0.315315 | 0.016088 | 0.022523 | 0.45045  | 0.083655 | 0.01287  |
| 0        | 0.074003 | 0.019305 | 0.315315 | 0.016088 | 0.022523 | 0.45045  | 0.083655 | 0.01287  |
| 9.925997 | 58.787   | 23.64221 | 25.7529  | 8.803089 | 44.10875 | 26.23874 | 24.01223 | 19.16345 |
| 6.985199 | 23.53282 | 19.57529 | 10.87516 | 6.624839 | 24.8166  | 8.648649 | 11.64414 | 9.095882 |
| 6.985199 | 23.53282 | 19.57529 | 10.87516 | 6.624839 | 24.8166  | 8.648649 | 11.64414 | 9.095882 |
| 0.003218 | 11.64093 | 0.083655 | 0.366795 | 0.234878 | 3.217503 | 0        | 0.045045 | 4.099099 |
| 0.003218 | 11.64093 | 0.083655 | 0.366795 | 0.234878 | 3.217503 | 0        | 0.045045 | 4.099099 |
| 1.048906 | 10.31853 | 1.270914 | 5.743243 | 0.772201 | 3.667954 | 9.980695 | 2.274775 | 0.05148  |
| 1.048906 | 10.31853 | 1.270914 | 5.743243 | 0.772201 | 3.667954 | 9.980695 | 2.274775 | 0.05148  |
| 0        | 0        | 0        | 0        | 0        | 0        | 0        | 0.119048 | 0        |
| 0        | 0        | 0        | 0        | 0        | 0        | 0        | 0.119048 | 0        |
| 2.676963 | 0.469756 | 0.920206 | 2.760618 | 4.208494 | 1.435006 | 0.675676 | 9.520592 | 3.349421 |
| 0        | 0        | 0        | 0        | 0.009653 | 0.189833 | 0        | 0        | 0        |
| 0        | 0        | 0        | 0        | 0.009653 | 0.189833 | 0        | 0        | 0        |
| 0        | 0        | 0        | 0        | 0.009653 | 0.189833 | 0        | 0        | 0        |
| 0        | 0        | 0        | 0        | 0        | 0        | 0        | 0        | 0        |
| 0        | 0        | 0        | 0        | 0        | 0        | 0        | 0        | 0        |
| 0        | 0        | 0        | 0        | 0        | 0        | 0        | 0        | 0        |
| 0        | 0        | 0        | 0        | 0        | 0        | 0        | 0        | 0        |
| 0.238095 | 0        | 0        | 0        | 0.009653 | 0.041828 | 0        | 0.456885 | 0        |
| 0.238095 | 0        | 0        | 0        | 0.009653 | 0.041828 | 0        | 0.456885 | 0        |
| 2.162162 | 0.402188 | 0.846203 | 2.483913 | 4.137709 | 0.694981 | 0.353925 | 8.844916 | 2.741313 |
| 1.389961 | 0.016088 | 0.363578 | 2.38417  | 1.657014 | 0.646718 | 0.222008 | 1.911197 | 2.055985 |
| 1.389961 | 0.016088 | 0.363578 | 2.38417  | 1.657014 | 0.646718 | 0.222008 | 1.911197 | 2.055985 |

| N23      | N24      | N26      | N27      | N28      | N29      | N30      | N31      | N32      |
|----------|----------|----------|----------|----------|----------|----------|----------|----------|
| 0        | 0        | 0        | 0        | 0        | 0        | 0        | 0        | 0        |
| 0        | 0        | 0        | 0        | 0        | 0        | 0        | 0        | 0        |
| 0.019305 | 0.119048 | 61.41248 | 0.096525 | 4.192407 | 61.23552 | 0.06435  | 16.90798 | 0.022523 |
| 0        | 0        | 0        | 0        | 0.003218 | 1.354569 | 0        | 0        | 0        |
| 0        | 0        | 0        | 0        | 0.003218 | 1.354569 | 0        | 0        | 0        |
| 0        | 0.003218 | 0        | 0        | 0        | 0.032175 | 0.035393 | 0        | 0        |
| 0        | 0.003218 | 0        | 0        | 0        | 0.032175 | 0.035393 | 0        | 0        |
| 0.016088 | 0.074003 | 61.10682 | 0.096525 | 0.21879  | 59.6686  | 0        | 16.90798 | 0.022523 |
| 0.016088 | 0.074003 | 61.10682 | 0.096525 | 0.21879  | 59.6686  | 0        | 16.90798 | 0.022523 |
| 0        | 0        | 0.238095 | 0        | 2.863578 | 0        | 0        | 0        | 0        |
| 0        | 0        | 0.238095 | 0        | 2.863578 | 0        | 0        | 0        | 0        |
| 0        | 0        | 0        | 0.003218 | 0        | 0        | 0        | 0        | 0.003218 |
| 0        | 0        | 0        | 0        | 0        | 0        | 0.003218 | 0.003218 | 0        |
| 0        | 0        | 0        | 0        | 0        | 0        | 0.003218 | 0.003218 | 0        |
| 0.106178 | 0.1287   | 0.148005 | 0.173745 | 0.405405 | 0.122265 | 0.138353 | 0.460103 | 0        |
| 0.106178 | 0.1287   | 0.148005 | 0.173745 | 0.405405 | 0.122265 | 0.138353 | 0.460103 | 0        |
| 0.23166  | 0.427928 | 0.511583 | 0.974903 | 1.843629 | 0.260618 | 1.396396 | 1.853282 | 1.344916 |
| 0.23166  | 0.427928 | 0.511583 | 0.974903 | 1.843629 | 0.260618 | 1.396396 | 1.853282 | 1.344916 |
| 0.01287  | 0.022523 | 0.061133 | 0        | 0.070785 | 0.028958 | 0.028958 | 0.083655 | 0.267053 |
| 0.01287  | 0.022523 | 0.061133 | 0        | 0.070785 | 0.028958 | 0.028958 | 0.083655 | 0.267053 |
| 0.070785 | 0.093308 | 0.173745 | 0.009653 | 0.186615 | 0.006435 | 0.370013 | 0.215573 | 0.048263 |
| 0.070785 | 0.093308 | 0.173745 | 0.009653 | 0.186615 | 0.006435 | 0.370013 | 0.215573 | 0.048263 |
| 28.98005 | 10.34749 | 12.36486 | 5.20592  | 17.94402 | 10.81725 | 21.1036  | 18.23037 | 24.24389 |
| 21.98842 | 7.728443 | 8.481338 | 0.016088 | 12.45495 | 5.022523 | 17.96654 | 12.23616 | 13.45882 |
| 21.98842 | 7.728443 | 8.481338 | 0.016088 | 12.45495 | 5.022523 | 17.96654 | 12.23616 | 13.45882 |
| 0.254183 | 0.003218 | 0.817246 | 0        | 0.067568 | 0.173745 | 0.775418 | 0.048263 | 4.350064 |
| 0.254183 | 0.003218 | 0.817246 | 0        | 0.067568 | 0.173745 | 0.775418 | 0.048263 | 4.350064 |
| 2.57722  | 0.215573 | 0.637066 | 0.598456 | 2.516088 | 1.798584 | 0.041828 | 1.312741 | 0.617761 |
| 2.57722  | 0.215573 | 0.637066 | 0.598456 | 2.516088 | 1.798584 | 0.041828 | 1.312741 | 0.617761 |
| 0        | 0.019305 | 0        | 0.009653 | 0        | 0        | 0.016088 | 0        | 0        |
| 0        | 0.019305 | 0        | 0.009653 | 0        | 0        | 0.016088 | 0        | 0        |
| 1.991635 | 6.341699 | 0.476191 | 4.90991  | 1.486487 | 1.779279 | 14.33076 | 3.597169 | 2.149292 |
| 0        | 0        | 0        | 0.2574   | 0.048263 | 0        | 0        | 0        | 0        |
| 0        | 0        | 0        | 0.2574   | 0.048263 | 0        | 0        | 0        | 0        |
| 0        | 0        | 0        | 0.2574   | 0.048263 | 0        | 0        | 0        | 0        |
| 0        | 0        | 0        | 0.2574   | 0        | 0        | 0        | 0        | 0        |
| 0        | 0        | 0        | 0.2574   | 0        | 0        | 0        | 0        | 0        |
| 0        | 0        | 0        | 0        | 0        | 0        | 0        | 0        | 0        |
| 0        | 0        | 0        | 0        | 0        | 0        | 0        | 0        | 0        |
| 0        | 0        | 0        | 0        | 0        | 0        | 0        | 0        | 0        |
| 0        | 0        | 0        | 0        | 0        | 0        | 0        | 0        | 0        |
| 1.805019 | 5.839768 | 0.273488 | 3.729086 | 1.402831 | 1.406049 | 14.23102 | 3.445946 | 2.081725 |
| 1.660232 | 5.2574   | 0.170528 | 3.500644 | 1.325611 | 1.290219 | 4.105534 | 0.765766 | 1.184041 |
| 1.660232 | 5.2574   | 0.170528 | 3.500644 | 1.325611 | 1.290219 | 4.105534 | 0.765766 | 1.184041 |

| N33      | N34      | N35      | N36      | N37      | N38      | N39      | N40      | N41      |
|----------|----------|----------|----------|----------|----------|----------|----------|----------|
| 0.006435 | 0.045045 | 0.032175 | 0.022523 | 0        | 0        | 0        | 0.003218 | 0        |
| 0        | 0        | 0        | 0        | 0        | 0        | 0        | 0        | 0        |
| 2.380952 | 50.55341 | 0.122265 | 0.598456 | 0.395753 | 32.56435 | 0.119048 | 51.44144 | 0.826898 |
| 0        | 0        | 0.006435 | 0        | 0        | 0        | 0        | 0        | 0        |
| 0        | 0        | 0.006435 | 0        | 0        | 0        | 0        | 0        | 0        |
| 0.003218 | 0.019305 | 0.003218 | 0        | 0.003218 | 3.751609 | 0.009653 | 0        | 0        |
| 0.003218 | 0.019305 | 0.003218 | 0        | 0.003218 | 3.751609 | 0.009653 | 0        | 0        |
| 1.315959 | 50.53411 | 0.112613 | 0.003218 | 0.006435 | 28.80631 | 0.109395 | 51.44144 | 0.826898 |
| 1.315959 | 50.53411 | 0.112613 | 0.003218 | 0.006435 | 28.80631 | 0.109395 | 51.44144 | 0.826898 |
| 0        | 0        | 0        | 0        | 0        | 0        | 0        | 0        | 0        |
| 0        | 0        | 0        | 0        | 0        | 0        | 0        | 0        | 0        |
| 0        | 0        | 0        | 0        | 0        | 0        | 0        | 0        | 0        |
| 0.11583  | 0.003218 | 0        | 0        | 0.003218 | 0        | 0        | 0.003218 | 0        |
| 0.11583  | 0.003218 | 0        | 0        | 0.003218 | 0        | 0        | 0.003218 | 0        |
| 1.122909 | 0.19305  | 1.068211 | 0.685328 | 0.794723 | 0.765766 | 0.276705 | 0.183398 | 0.247748 |
| 1.122909 | 0.19305  | 1.068211 | 0.685328 | 0.794723 | 0.765766 | 0.276705 | 0.183398 | 0.247748 |
| 3.877091 | 0.315315 | 3.632561 | 0.791506 | 1.396396 | 0.344273 | 1.036036 | 0.27027  | 0.212355 |
| 3.877091 | 0.315315 | 3.632561 | 0.791506 | 1.396396 | 0.344273 | 1.036036 | 0.27027  | 0.212355 |
| 0.074003 | 0.109395 | 0.009653 | 0.054698 | 0.228443 | 0.241313 | 0.148005 | 0.07722  | 0.045045 |
| 0.074003 | 0.109395 | 0.009653 | 0.054698 | 0.228443 | 0.241313 | 0.148005 | 0.07722  | 0.045045 |
| 0.199485 | 1.142214 | 0.131918 | 0.003218 | 0.02574  | 0.106178 | 0.009653 | 0.05148  | 0.234878 |
| 0.199485 | 1.142214 | 0.131918 | 0.003218 | 0.02574  | 0.106178 | 0.009653 | 0.05148  | 0.234878 |
| 19.16023 | 10.19305 | 6.425354 | 25.41506 | 28.30759 | 15.74968 | 25.01609 | 12.50322 | 23.82883 |
| 8.317246 | 7.35843  | 4.189189 | 11.76963 | 8.635779 | 6.203346 | 14.03475 | 6.647362 | 14.8166  |
| 8.317246 | 7.35843  | 4.189189 | 11.76963 | 8.635779 | 6.203346 | 14.03475 | 6.647362 | 14.8166  |
| 0.913771 | 0.402188 | 0.019305 | 0.222008 | 4.925997 | 0.341055 | 0.839768 | 0.511583 | 0.434363 |
| 0.913771 | 0.402188 | 0.019305 | 0.222008 | 4.925997 | 0.341055 | 0.839768 | 0.511583 | 0.434363 |
| 2.921493 | 1.367439 | 0.05148  | 6.785714 | 6.576577 | 0.955598 | 1.743887 | 2.425997 | 1.052124 |
| 2.921493 | 1.367439 | 0.05148  | 6.785714 | 6.576577 | 0.955598 | 1.743887 | 2.425997 | 1.052124 |
| 0.14157  | 0        | 0        | 0        | 0.736808 | 0        | 0        | 0        | 0        |
| 0.14157  | 0        | 0        | 0        | 0.736808 | 0        | 0        | 0        | 0        |
| 0.746461 | 1.901544 | 3.745174 | 1.161519 | 1.576577 | 1.219434 | 3.108108 | 1.650579 | 4.839125 |
| 0.003218 | 0        | 0        | 0        | 0        | 0        | 2.329472 | 0        | 1.624839 |
| 0.003218 | 0        | 0        | 0        | 0        | 0        | 2.329472 | 0        | 1.624839 |
| 0.003218 | 0        | 0        | 0        | 0        | 0        | 2.329472 | 0        | 1.624839 |
| 0        | 0        | 0        | 0        | 0        | 0        | 0.10296  | 0        | 0        |
| 0        | 0        | 0        | 0        | 0        | 0        | 0.10296  | 0        | 0        |
| 0        | 0        | 0        | 0        | 0        | 0        | 2.226512 | 0        | 1.624839 |
| 0        | 0        | 0        | 0        | 0        | 0        | 2.226512 | 0        | 1.624839 |
| 0        | 0        | 0        | 0        | 0        | 0        | 0        | 0        | 0        |
| 0        | 0        | 0        | 0        | 0        | 0        | 0        | 0        | 0        |
| 0.524453 | 1.862934 | 3.577864 | 0.997426 | 0.762548 | 0.888031 | 0.659588 | 1.373874 | 3.001931 |
| 0.344273 | 0.675676 | 2.16538  | 0.740026 | 0.299228 | 0.855856 | 0.392535 | 0.36036  | 2.87323  |
| 0.344273 | 0.675676 | 2.16538  | 0.740026 | 0.299228 | 0.855856 | 0.392535 | 0.36036  | 2.87323  |

| P001     | P002     | P003     | P004     | P005     | P006     | P007     | P008     | P009     |
|----------|----------|----------|----------|----------|----------|----------|----------|----------|
| 0        | 0        | 0        | 0        | 0        | 0        | 0        | 0        | 0        |
| 0        | 0        | 0        | 0        | 0        | 0        | 0        | 0        | 0        |
| 0.006435 | 0        | 2.567568 | 0        | 7.213642 | 1.599099 | 27.95367 | 0        | 0        |
| 0        | 0        | 1.161519 | 0        | 0        | 0        | 0        | 0        | 0        |
| 0        | 0        | 1.161519 | 0        | 0        | 0        | 0        | 0        | 0        |
| 0        | 0        | 0        | 0        | 0        | 1.116474 | 27.93436 | 0        | 0        |
| 0        | 0        | 0        | 0        | 0        | 1.116474 | 27.93436 | 0        | 0        |
| 0        | 0        | 0        | 0        | 7.158945 | 0        | 0.019305 | 0        | 0        |
| 0        | 0        | 0        | 0        | 7.158945 | 0        | 0.019305 | 0        | 0        |
| 0.006435 | 0        | 0        | 0        | 0        | 0        | 0        | 0        | 0        |
| 0.006435 | 0        | 0        | 0        | 0        | 0        | 0        | 0        | 0        |
| 0        | 0        | 0.070785 | 0        | 0        | 0        | 0        | 0.119048 | 0.003218 |
| 0        | 0        | 0        | 0        | 0.006435 | 0.028958 | 0        | 0.003218 | 0        |
| 0        | 0        | 0        | 0        | 0.006435 | 0.028958 | 0        | 0.003218 | 0        |
| 0.10296  | 0.135135 | 0.022523 | 0.273488 | 0.228443 | 0.10296  | 0.003218 | 0.267053 | 0.260618 |
| 0.10296  | 0.135135 | 0.022523 | 0.273488 | 0.228443 | 0.10296  | 0.003218 | 0.267053 | 0.260618 |
| 0.267053 | 0.199485 | 0.46332  | 0.820463 | 0.254183 | 0.357143 | 0.112613 | 1.106821 | 0.299228 |
| 0.267053 | 0.199485 | 0.46332  | 0.820463 | 0.254183 | 0.357143 | 0.112613 | 1.106821 | 0.299228 |
| 0        | 0        | 0        | 0        | 0        | 0.080438 | 0.009653 | 0.057915 | 0.02574  |
| 0        | 0        | 0        | 0        | 0        | 0.080438 | 0.009653 | 0.057915 | 0.02574  |
| 0.48906  | 0        | 0        | 8.063063 | 0.14157  | 0.148005 | 0.061133 | 0.286358 | 0.093308 |
| 0.48906  | 0        | 0        | 8.063063 | 0.14157  | 0.148005 | 0.061133 | 0.286358 | 0.093308 |
| 16.49936 | 7.35843  | 18.30759 | 17.81532 | 10.6982  | 33.38803 | 1.695624 | 25.3861  | 23.83205 |
| 10.9556  | 4.028314 | 8.806306 | 13.9897  | 8.262548 | 11.40927 | 1.106821 | 14.60103 | 9.401544 |
| 10.9556  | 4.028314 | 8.806306 | 13.9897  | 8.262548 | 11.40927 | 1.106821 | 14.60103 | 9.401544 |
| 0.469755 | 0        | 1.148649 | 0        | 0        | 0.29601  | 0        | 0.083655 | 0.485843 |
| 0.469755 | 0        | 1.148649 | 0        | 0        | 0.29601  | 0        | 0.083655 | 0.485843 |
| 0.067568 | 1.061776 | 0.839768 | 0.003218 | 0.344273 | 3.973616 | 0.016088 | 0.028958 | 2.545045 |
| 0.067568 | 1.061776 | 0.839768 | 0.003218 | 0.344273 | 3.973616 | 0.016088 | 0.028958 | 2.545045 |
| 0        | 0        | 0        | 0        | 0        | 0        | 0        | 0        | 0        |
| 0        | 0        | 0        | 0        | 0        | 0        | 0        | 0        | 0        |
| 3.246461 | 3.249678 | 3.957529 | 0.392535 | 6.534749 | 1.756757 | 1.489704 | 1.389961 | 6.212999 |
| 0        | 0        | 0        | 0        | 0.009653 | 0        | 0        | 0        | 0        |
| 0        | 0        | 0        | 0        | 0        | 0        | 0        | 0        | 0        |
| 0        | 0        | 0        | 0        | 0        | 0        | 0        | 0        | 0        |
| 0        | 0        | 0        | 0        | 0        | 0        | 0        | 0        | 0        |
| 0        | 0        | 0        | 0        | 0        | 0        | 0        | 0        | 0        |
| 0        | 0        | 0        | 0        | 0        | 0        | 0        | 0        | 0        |
| 0        | 0        | 0        | 0        | 0        | 0        | 0        | 0        | 0        |
| 0        | 0        | 0        | 0        | 0        | 0        | 0        | 0        | 0        |
| 0        | 0        | 0        | 0        | 0        | 0        | 0        | 0        | 0        |
| 2.490348 | 3.243243 | 3.957529 | 0.37323  | 5.698198 | 1.409266 | 1.476834 | 1.338481 | 5.881596 |
| 1.628057 | 1.036036 | 1.377091 | 0.15444  | 2.16538  | 1.299871 | 1.277349 | 0.852638 | 4.324324 |
| 1.628057 | 1.036036 | 1.377091 | 0.15444  | 2.16538  | 1.299871 | 1.277349 | 0.852638 | 4.317889 |



| P010     | P012     | P013     | P014     | P015     | P016     | P017     | P018     | P019     |
|----------|----------|----------|----------|----------|----------|----------|----------|----------|
| 0        | 0        | 0        | 0        | 0        | 0        | 0        | 0        | 0        |
| 0        | 0        | 0        | 0        | 0        | 0        | 0        | 0        | 0        |
| 1.315959 | 0        | 0.003218 | 0.299228 | 0.720721 | 23.82883 | 26.1583  | 0        | 0.183398 |
| 0        | 0        | 0        | 0        | 0        | 0        | 1.782497 | 0        | 0        |
| 0        | 0        | 0        | 0        | 0        | 0        | 1.782497 | 0        | 0        |
| 0        | 0        | 0        | 0        | 0        | 0        | 9.52381  | 0        | 0        |
| 0        | 0        | 0        | 0        | 0        | 0        | 9.52381  | 0        | 0        |
| 0        | 0        | 0        | 0        | 0        | 23.60682 | 13.81918 | 0        | 0        |
| 0        | 0        | 0        | 0        | 0        | 23.60682 | 13.81918 | 0        | 0        |
| 0        | 0        | 0        | 0        | 0        | 0        | 0        | 0        | 0        |
| 0        | 0        | 0        | 0        | 0        | 0        | 0        | 0        | 0        |
| 0        | 0.03861  | 0        | 0        | 0        | 0.003218 | 0        | 0        | 0.035393 |
| 0        | 0        | 0        | 0        | 0        | 0        | 0.06435  | 0        | 0        |
| 0        | 0        | 0        | 0        | 0        | 0        | 0.06435  | 0        | 0        |
| 0.344273 | 0.794723 | 0.093308 | 0.14157  | 0.070785 | 0.125483 | 0.099743 | 0.18018  | 0.067568 |
| 0.344273 | 0.794723 | 0.093308 | 0.14157  | 0.070785 | 0.125483 | 0.099743 | 0.18018  | 0.067568 |
| 0.109395 | 0        | 0.501931 | 1.287001 | 0.627413 | 1.090734 | 0.151223 | 0.775418 | 1.895109 |
| 0.109395 | 0        | 0.501931 | 1.287001 | 0.627413 | 1.090734 | 0.151223 | 0.775418 | 1.895109 |
| 0.003218 | 0        | 0.067568 | 0.186615 | 0.112613 | 0.03861  | 0.109395 | 0.006435 | 0.086873 |
| 0.003218 | 0        | 0.067568 | 0.186615 | 0.112613 | 0.03861  | 0.109395 | 0.006435 | 0.086873 |
| 0        | 2.882883 | 0.16731  | 0.048263 | 0.479408 | 0.41184  | 0.444015 | 1.132561 | 0.199485 |
| 0        | 2.882883 | 0.16731  | 0.048263 | 0.479408 | 0.41184  | 0.444015 | 1.132561 | 0.199485 |
| 6.306306 | 15.67889 | 17.44208 | 20.30888 | 21.8018  | 23.9704  | 22.72523 | 10.06435 | 26.43501 |
| 5.09009  | 12.19755 | 5.225225 | 6.122909 | 10.81081 | 17.69627 | 8.423423 | 4.095882 | 9.137709 |
| 5.09009  | 12.19755 | 5.225225 | 6.122909 | 10.81081 | 17.69627 | 8.423423 | 4.095882 | 9.137709 |
| 0        | 0.070785 | 3.092021 | 3.124196 | 3.304376 | 0        | 0.814028 | 0.324968 | 0.588803 |
| 0        | 0.070785 | 3.092021 | 3.124196 | 3.304376 | 0        | 0.814028 | 0.324968 | 0.588803 |
| 0.041828 | 0.05148  | 1.602317 | 2.004505 | 0.772201 | 1.460746 | 1.087516 | 1.312741 | 2.01094  |
| 0.041828 | 0.05148  | 1.602317 | 2.004505 | 0.772201 | 1.460746 | 1.087516 | 1.312741 | 2.01094  |
| 0        | 0        | 0        | 0.032175 | 0.006435 | 0        | 0.006435 | 0        | 0        |
| 0        | 0        | 0        | 0.032175 | 0.006435 | 0        | 0.006435 | 0        | 0        |
| 6.570142 | 2.503218 | 4.761905 | 1.492922 | 3.552124 | 2.8861   | 4.041184 | 0.791506 | 4.057272 |
| 0        | 0        | 0        | 0        | 0        | 0        | 0        | 0        | 0.656371 |
| 0        | 0        | 0        | 0        | 0        | 0        | 0        | 0        | 0.656371 |
| 0        | 0        | 0        | 0        | 0        | 0        | 0        | 0        | 0.656371 |
| 0        | 0        | 0        | 0        | 0        | 0        | 0        | 0        | 0        |
| 0        | 0        | 0        | 0        | 0        | 0        | 0        | 0        | 0        |
| 0        | 0        | 0        | 0        | 0        | 0        | 0        | 0        | 0        |
| 0        | 0        | 0        | 0        | 0        | 0        | 0        | 0        | 0        |
| 0        | 0        | 0        | 0        | 0        | 0        | 0        | 0        | 0        |
| 0        | 0        | 0        | 0        | 0        | 0        | 0        | 0        | 0        |
| 0        | 0        | 0        | 0        | 0        | 0        | 0        | 0        | 0        |
| 6.106821 | 2.503218 | 4.430502 | 1.290219 | 3.365508 | 2.59009  | 3.018018 | 0.707851 | 2.52574  |
| 5.701416 | 2.464607 | 2.8861   | 1.003861 | 2.657658 | 1.792149 | 2.20399  | 0.559846 | 2.432432 |
| 5.701416 | 2.464607 | 2.8861   | 1.003861 | 2.657658 | 1.792149 | 2.20399  | 0.559846 | 2.432432 |

| P020     | P021     | P022     | P023     | P024     | P025     | P026     | P027     | P028     |
|----------|----------|----------|----------|----------|----------|----------|----------|----------|
| 0        | 0        | 0        | 0        | 0        | 0        | 0        | 0        | 0        |
| 0        | 0        | 0        | 0        | 0        | 0        | 0        | 0        | 0        |
| 0.003218 | 48.53604 | 0        | 0        | 16.68919 | 40.72072 | 0        | 0        | 0        |
| 0        | 0        | 0        | 0        | 0        | 0        | 0        | 0        | 0        |
| 0        | 0        | 0        | 0        | 0        | 0        | 0        | 0        | 0        |
| 0        | 1.261261 | 0        | 0        | 0        | 0        | 0        | 0        | 0        |
| 0        | 1.261261 | 0        | 0        | 0        | 0        | 0        | 0        | 0        |
| 0        | 47.11068 | 0        | 0        | 16.67954 | 40.69498 | 0        | 0        | 0        |
| 0        | 47.11068 | 0        | 0        | 16.67954 | 40.69498 | 0        | 0        | 0        |
| 0        | 0        | 0        | 0        | 0        | 0        | 0        | 0        | 0        |
| 0        | 0        | 0        | 0        | 0        | 0        | 0        | 0        | 0        |
| 0        | 0        | 0        | 0        | 0.003218 | 0        | 0        | 0        | 0        |
| 0        | 0        | 0        | 0        | 0.01287  | 0.003218 | 0        | 0        | 0        |
| 0        | 0        | 0        | 0        | 0.01287  | 0.003218 | 0        | 0        | 0        |
| 0        | 0.061133 | 0.070785 | 0        | 0.27027  | 0.003218 | 0        | 1.048906 | 0.263835 |
| 0        | 0.061133 | 0.070785 | 0        | 0.27027  | 0.003218 | 0        | 1.048906 | 0.263835 |
| 0.344273 | 0.34749  | 1.315959 | 0.19305  | 1.032819 | 0.144788 | 0        | 0.756113 | 1.119691 |
| 0.344273 | 0.34749  | 1.315959 | 0.19305  | 1.032819 | 0.144788 | 0        | 0.756113 | 1.119691 |
| 0.01287  | 0.028958 | 0.035393 | 0        | 0.138353 | 0.032175 | 0        | 0.006435 | 0.074003 |
| 0.01287  | 0.028958 | 0.035393 | 0        | 0.138353 | 0.032175 | 0        | 0.006435 | 0.074003 |
| 0.112613 | 0.003218 | 0.176963 | 0.070785 | 0.415058 | 0        | 0.028958 | 0.21879  | 0.164093 |
| 0.112613 | 0.003218 | 0.176963 | 0.070785 | 0.415058 | 0        | 0.028958 | 0.21879  | 0.164093 |
| 13.18855 | 18.2529  | 20.18018 | 16.05534 | 19.72651 | 8.240026 | 0.704633 | 3.301158 | 19.13449 |
| 5.768983 | 6.332046 | 8.976834 | 4.427284 | 13.85135 | 6.734234 | 0.122265 | 1.045689 | 8.468468 |
| 5.768983 | 6.332046 | 8.976834 | 4.427284 | 13.85135 | 6.734234 | 0.122265 | 1.045689 | 8.468468 |
| 1.341699 | 1.299871 | 0.730373 | 0.826898 | 1.052124 | 0        | 0        | 0        | 0.131918 |
| 1.341699 | 1.299871 | 0.730373 | 0.826898 | 1.052124 | 0        | 0        | 0        | 0.131918 |
| 0.929858 | 3.027671 | 1.058559 | 1.904762 | 1.415701 | 0.045045 | 0.009653 | 0.02574  | 4.269627 |
| 0.929858 | 3.027671 | 1.058559 | 1.904762 | 1.415701 | 0.045045 | 0.009653 | 0.02574  | 4.269627 |
| 0.016088 | 0        | 0        | 0        | 0        | 0        | 0        | 0        | 0        |
| 0.016088 | 0        | 0        | 0        | 0        | 0        | 0        | 0        | 0        |
| 7.992278 | 1.827542 | 2.12677  | 2.081725 | 4.111969 | 7.503218 | 7.007722 | 6.180824 | 2.738095 |
| 0        | 0        | 0        | 0        | 0        | 0        | 0        | 0        | 0        |
| 0        | 0        | 0        | 0        | 0        | 0        | 0        | 0        | 0        |
| 0        | 0        | 0        | 0        | 0        | 0        | 0        | 0        | 0        |
| 0        | 0        | 0        | 0        | 0        | 0        | 0        | 0        | 0        |
| 0        | 0        | 0        | 0        | 0        | 0        | 0        | 0        | 0        |
| 0        | 0        | 0        | 0        | 0        | 0        | 0        | 0        | 0        |
| 0        | 0        | 0        | 0        | 0        | 0        | 0        | 0        | 0        |
| 0        | 0        | 0        | 0        | 0        | 0        | 0        | 0        | 0        |
| 0        | 0        | 0        | 0        | 0        | 0        | 0        | 0        | 0        |
| 0        | 0        | 0        | 0        | 0        | 0        | 0        | 0        | 0        |
| 7.310167 | 1.412484 | 0.746461 | 1.566924 | 4.057272 | 7.5      | 5.984556 | 5.859073 | 2.133205 |
| 6.483269 | 1.396396 | 0.678893 | 1.515444 | 1.319176 | 6.032819 | 0        | 3.027671 | 2.10103  |
| 6.483269 | 1.396396 | 0.678893 | 1.515444 | 1.319176 | 6.032819 | 0        | 3.027671 | 2.10103  |

| P030     | P031     | P033     | P034     | P035     | P036     | P037     | P038     | P039     |          |
|----------|----------|----------|----------|----------|----------|----------|----------|----------|----------|
| 0        | 0        | 0        | 0        | 0        | 0        | 0        | 0        | 0.006435 | 0        |
| 0        | 0        | 0        | 0        | 0        | 0        | 0        | 0        | 0        | 0        |
| 0        | 20.80438 | 0.540541 | 4.025097 | 0.003218 | 0.006435 | 0.11583  | 0.968468 | 0.016088 | 0        |
| 0        | 0        | 0.057915 | 0.933076 | 0.003218 | 0        | 0        | 0        | 0        | 0        |
| 0        | 0        | 0.057915 | 0.933076 | 0.003218 | 0        | 0        | 0        | 0        | 0        |
| 0        | 0        | 0        | 0        | 0        | 0        | 0        | 0        | 0        | 0.003218 |
| 0        | 0        | 0        | 0        | 0        | 0        | 0        | 0        | 0        | 0.003218 |
| 0        | 20.49228 | 0.02574  | 0        | 0        | 0        | 0        | 0        | 0        | 0.01287  |
| 0        | 20.49228 | 0.02574  | 0        | 0        | 0        | 0        | 0        | 0        | 0.01287  |
| 0        | 0        | 0.032175 | 0.328185 | 0        | 0        | 0        | 0        | 0        | 0        |
| 0        | 0        | 0.032175 | 0.328185 | 0        | 0        | 0        | 0        | 0        | 0        |
| 0        | 0        | 0.003218 | 0        | 0        | 0.772201 | 0        | 0        | 0        | 0.756113 |
| 0        | 0        | 0        | 0        | 0        | 0        | 0        | 0.016088 | 0        | 0        |
| 0        | 0        | 0        | 0        | 0        | 0        | 0        | 0.016088 | 0        | 0        |
| 1.097169 | 0.1287   | 0.006435 | 0.003218 | 0.202703 | 1.515444 | 0.045045 | 0.18018  | 0.176963 | 0        |
| 1.097169 | 0.1287   | 0.006435 | 0.003218 | 0.202703 | 1.515444 | 0.045045 | 0.18018  | 0.176963 | 0        |
| 0.608108 | 0.32175  | 0.006435 | 0        | 0.176963 | 0.862291 | 0.006435 | 1.573359 | 2.158945 | 0        |
| 0.608108 | 0.32175  | 0.006435 | 0        | 0.176963 | 0.862291 | 0.006435 | 1.573359 | 2.158945 | 0        |
| 0.045045 | 0.350708 | 0        | 0        | 0.016088 | 0.032175 | 0.035393 | 0.041828 | 0.14157  | 0        |
| 0.045045 | 0.350708 | 0        | 0        | 0.016088 | 0.032175 | 0.035393 | 0.041828 | 0.14157  | 0        |
| 0.962033 | 0.21879  | 0        | 0        | 0.920206 | 2.985843 | 0.093308 | 0.32175  | 1.631274 | 0        |
| 0.962033 | 0.21879  | 0        | 0        | 0.920206 | 2.985843 | 0.093308 | 0.32175  | 1.631274 | 0        |
| 12.06564 | 26.48327 | 6.148649 | 3.754826 | 21.2677  | 19.07658 | 20       | 20.54376 | 14.80695 | 0        |
| 9.292149 | 13.96396 | 0.02574  | 0        | 9.333977 | 12.78314 | 6.048906 | 6.531532 | 13.5843  | 0        |
| 9.292149 | 13.96396 | 0.02574  | 0        | 9.333977 | 12.78314 | 6.048906 | 6.531532 | 13.5843  | 0        |
| 0        | 0.807593 | 0.06435  | 0.003218 | 0.119048 | 0.01287  | 1.010296 | 1.653797 | 0        | 0        |
| 0        | 0.807593 | 0.06435  | 0.003218 | 0.119048 | 0.01287  | 1.010296 | 1.653797 | 0        | 0        |
| 0.14157  | 0.910553 | 0.006435 | 0        | 1.029601 | 2.223295 | 0.563063 | 1.016731 | 0.27027  | 0        |
| 0.14157  | 0.910553 | 0.006435 | 0        | 1.029601 | 2.223295 | 0.563063 | 1.016731 | 0.27027  | 0        |
| 0        | 0.016088 | 0        | 0        | 0        | 0        | 0        | 0        | 0        | 0        |
| 0        | 0.016088 | 0        | 0        | 0        | 0        | 0        | 0        | 0        | 0        |
| 9.559202 | 1.563707 | 0.2574   | 0.575933 | 5.862291 | 6.357786 | 1.895109 | 5.614543 | 6.99807  | 0        |
| 0        | 0        | 0        | 0        | 0        | 0        | 0        | 0        | 0        | 0        |
| 0        | 0        | 0        | 0        | 0        | 0        | 0        | 0        | 0        | 0        |
| 0        | 0        | 0        | 0        | 0        | 0        | 0        | 0        | 0        | 0        |
| 0        | 0        | 0        | 0        | 0        | 0        | 0        | 0        | 0        | 0        |
| 0        | 0        | 0        | 0        | 0        | 0        | 0        | 0        | 0        | 0        |
| 0        | 0        | 0        | 0        | 0        | 0        | 0        | 0        | 0        | 0        |
| 0        | 0        | 0        | 0        | 0        | 0        | 0        | 0        | 0        | 0        |
| 0        | 0        | 0        | 0        | 0        | 0        | 0        | 0        | 0        | 0        |
| 0        | 0        | 0        | 0        | 0        | 0        | 0        | 0        | 0        | 0        |
| 0        | 0        | 0        | 0        | 0        | 0        | 0        | 0        | 0        | 0        |
| 9.49807  | 1.476834 | 0.1287   | 0.453668 | 5.666023 | 6.354569 | 1.689189 | 5.131918 | 6.99807  | 0        |
| 9.079794 | 1.248391 | 0.016088 | 0.453668 | 0.328185 | 0.682111 | 1.657014 | 1.901544 | 0.492278 | 0        |
| 9.079794 | 1.248391 | 0.016088 | 0.453668 | 0.328185 | 0.682111 | 1.657014 | 1.901544 | 0.492278 | 0        |

| P040     | P041     | P042     | P043     | P044     | P045     | P046     | P047     | P048     |
|----------|----------|----------|----------|----------|----------|----------|----------|----------|
| 0        | 0        | 0        | 0        | 0        | 0        | 0        | 0        | 0        |
| 0        | 0        | 0        | 0        | 0        | 0        | 0        | 0        | 0        |
| 0.003218 | 25.03539 | 0        | 12.69627 | 0.02574  | 18.70656 | 0.43758  | 0        | 0.981338 |
| 0        | 0        | 0        | 0        | 0        | 0        | 0        | 0        | 0        |
| 0        | 0        | 0        | 0        | 0        | 0        | 0        | 0        | 0        |
| 0        | 25.03539 | 0        | 12.69627 | 0.003218 | 0        | 0        | 0        | 0        |
| 0        | 25.03539 | 0        | 12.69627 | 0.003218 | 0        | 0        | 0        | 0        |
| 0        | 0        | 0        | 0        | 0        | 18.70656 | 0        | 0        | 0        |
| 0        | 0        | 0        | 0        | 0        | 18.70656 | 0        | 0        | 0        |
| 0        | 0        | 0        | 0        | 0        | 0        | 0        | 0        | 0        |
| 0        | 0        | 0        | 0        | 0        | 0        | 0        | 0        | 0        |
| 0        | 0.698198 | 0        | 0        | 0        | 0        | 0        | 0.968468 | 0        |
| 0        | 0        | 0.032175 | 0.003218 | 0        | 0        | 0        | 0        | 0        |
| 0        | 0        | 0.032175 | 0.003218 | 0        | 0        | 0        | 0        | 0        |
| 0.469755 | 0.054698 | 0.135135 | 0.106178 | 0.032175 | 0.164093 | 0        | 0.006435 | 0.086873 |
| 0.469755 | 0.054698 | 0.135135 | 0.106178 | 0.032175 | 0.164093 | 0        | 0.006435 | 0.086873 |
| 0.48906  | 0.810811 | 2.619048 | 0.740026 | 0.312098 | 0.006435 | 0.003218 | 5.331403 | 0.540541 |
| 0.48906  | 0.810811 | 2.619048 | 0.740026 | 0.312098 | 0.006435 | 0.003218 | 5.331403 | 0.540541 |
| 0.05148  | 0.070785 | 0.067568 | 0.06435  | 0        | 0.003218 | 0        | 0        | 0.016088 |
| 0.05148  | 0.070785 | 0.067568 | 0.06435  | 0        | 0.003218 | 0        | 0        | 0.016088 |
| 0.119048 | 0        | 0.057915 | 0.080438 | 0.357143 | 0.408623 | 0.009653 | 1.811454 | 0.138353 |
| 0.119048 | 0        | 0.057915 | 0.080438 | 0.357143 | 0.408623 | 0.009653 | 1.811454 | 0.138353 |
| 9.140927 | 25.66602 | 19.16345 | 16.49292 | 23.52317 | 1.927284 | 0.579151 | 1.589447 | 13.36873 |
| 4.758687 | 14.45624 | 12.58044 | 3.741956 | 1.190476 | 0.743243 | 0.019305 | 0        | 6.788932 |
| 4.758687 | 14.45624 | 12.58044 | 3.741956 | 1.190476 | 0.743243 | 0.019305 | 0        | 6.788932 |
| 1.669884 | 0.524453 | 0.534106 | 0.746461 | 0        | 0.022523 | 0        | 0        | 1.171171 |
| 1.669884 | 0.524453 | 0.534106 | 0.746461 | 0        | 0.022523 | 0        | 0        | 1.171171 |
| 0.434363 | 2.56435  | 1.747104 | 1.138996 | 4.253539 | 0.344273 | 0.048263 | 0        | 1.361004 |
| 0.434363 | 2.56435  | 1.747104 | 1.138996 | 4.253539 | 0.344273 | 0.048263 | 0        | 1.361004 |
| 0        | 0        | 0        | 0        | 0        | 0        | 0        | 0.003218 | 0.003218 |
| 0        | 0        | 0        | 0        | 0        | 0        | 0        | 0.003218 | 0.003218 |
| 3.310811 | 2.892535 | 5.267053 | 2.956886 | 5.20592  | 7.496783 | 59.85199 | 13.77413 | 4.218147 |
| 0        | 0        | 0        | 0        | 0.881596 | 0        | 0        | 0        | 0        |
| 0        | 0        | 0        | 0        | 0.881596 | 0        | 0        | 0        | 0        |
| 0        | 0        | 0        | 0        | 0.881596 | 0        | 0        | 0        | 0        |
| 0        | 0        | 0        | 0        | 0        | 0        | 0        | 0        | 0        |
| 0        | 0        | 0        | 0        | 0        | 0        | 0        | 0        | 0        |
| 0        | 0        | 0        | 0        | 0        | 0        | 0        | 0        | 0        |
| 0        | 0        | 0        | 0        | 0        | 0        | 0        | 0        | 0        |
| 0        | 0        | 0        | 0        | 0        | 0        | 0        | 0        | 0        |
| 0        | 0        | 0        | 0        | 0        | 0        | 0        | 0        | 0        |
| 3.243243 | 2.580438 | 4.877735 | 2.786358 | 2.51287  | 7.184685 | 58.21429 | 13.77413 | 3.941441 |
| 1.962677 | 2.300515 | 2.702703 | 2.53861  | 1.644144 | 1.364221 | 0.160875 | 0        | 1.512227 |
| 1.962677 | 2.300515 | 2.702703 | 2.53861  | 1.644144 | 1.364221 | 0.160875 | 0        | 1.512227 |

| P049     | P050     | P051     | P052     | P053     | P054     | P056     | P057     | P058     |
|----------|----------|----------|----------|----------|----------|----------|----------|----------|
| 0.006435 | 0        | 0        | 0.045045 | 0        | 0        | 0        | 0        | 0        |
| 0        | 0        | 0        | 0        | 0        | 0        | 0        | 0        | 0        |
| 0.006435 | 0        | 0        | 16.30952 | 0        | 15.76255 | 5.910553 | 0.003218 | 0        |
| 0        | 0        | 0        | 0        | 0        | 0.003218 | 0        | 0        | 0        |
| 0        | 0        | 0        | 0        | 0        | 0.003218 | 0        | 0        | 0        |
| 0        | 0        | 0        | 0        | 0        | 6.129344 | 5.910553 | 0        | 0        |
| 0        | 0        | 0        | 0        | 0        | 6.129344 | 5.910553 | 0        | 0        |
| 0        | 0        | 0        | 11.03604 | 0        | 9.60103  | 0        | 0        | 0        |
| 0        | 0        | 0        | 11.03604 | 0        | 9.60103  | 0        | 0        | 0        |
| 0        | 0        | 0        | 0        | 0        | 0        | 0        | 0        | 0        |
| 0        | 0        | 0        | 0        | 0        | 0        | 0        | 0        | 0        |
| 0        | 0        | 0        | 0        | 0        | 0        | 0        | 0        | 0        |
| 0.003218 | 0        | 0        | 0        | 0        | 0        | 0        | 0        | 0        |
| 0.003218 | 0        | 0        | 0        | 0        | 0        | 0        | 0        | 0        |
| 0.170528 | 0.02574  | 0.608108 | 0.032175 | 0.096525 | 0.016088 | 0.006435 | 0.035393 | 0.138353 |
| 0.170528 | 0.02574  | 0.608108 | 0.032175 | 0.096525 | 0.016088 | 0.006435 | 0.035393 | 0.138353 |
| 2.776705 | 0        | 0.003218 | 0.543758 | 0        | 0.2574   | 0.028958 | 0.482625 | 0.427928 |
| 2.776705 | 0        | 0.003218 | 0.543758 | 0        | 0.2574   | 0.028958 | 0.482625 | 0.427928 |
| 0.096525 | 0        | 0.03861  | 0        | 0        | 0.003218 | 0.009653 | 0.016088 | 0.041828 |
| 0.096525 | 0        | 0.03861  | 0        | 0        | 0.003218 | 0.009653 | 0.016088 | 0.041828 |
| 0.016088 | 0.03861  | 1.692407 | 0.032175 | 0.041828 | 48.05341 | 0.138353 | 0.23166  | 0.006435 |
| 0.016088 | 0.03861  | 1.692407 | 0.032175 | 0.041828 | 48.05341 | 0.138353 | 0.23166  | 0.006435 |
| 18.35586 | 2.86036  | 4.7426   | 19.05084 | 8.564994 | 1.930502 | 5.225225 | 11.1583  | 33.83848 |
| 7.686615 | 0        | 2.97619  | 14.07658 | 0        | 1.599099 | 3.088803 | 3.909266 | 19.49485 |
| 7.686615 | 0        | 2.97619  | 14.07658 | 0        | 1.599099 | 3.088803 | 3.909266 | 19.49485 |
| 0.907336 | 0        | 0        | 0        | 0        | 0        | 0.01287  | 0.466538 | 0.003218 |
| 0.907336 | 0        | 0        | 0        | 0        | 0        | 0.01287  | 0.466538 | 0.003218 |
| 4.089447 | 0.035393 | 0.247748 | 0.138353 | 3.262548 | 0.045045 | 0.03861  | 1.071429 | 3.268983 |
| 4.089447 | 0.035393 | 0.247748 | 0.138353 | 3.262548 | 0.045045 | 0.03861  | 1.071429 | 3.268983 |
| 0        | 0        | 0        | 0        | 0        | 0        | 0        | 0        | 0        |
| 0        | 0        | 0        | 0        | 0        | 0        | 0        | 0        | 0        |
| 4.45946  | 0.875161 | 6.135779 | 2.902188 | 3.712999 | 11.39318 | 4.388674 | 2.223295 | 1.759974 |
| 0        | 0        | 0        | 0        | 0        | 0        | 0        | 0        | 0        |
| 0        | 0        | 0        | 0        | 0        | 0        | 0        | 0        | 0        |
| 0        | 0        | 0        | 0        | 0        | 0        | 0        | 0        | 0        |
| 0        | 0        | 0        | 0        | 0        | 0        | 0        | 0        | 0        |
| 0        | 0        | 0        | 0        | 0        | 0        | 0        | 0        | 0        |
| 0        | 0        | 0        | 0        | 0        | 0        | 0        | 0        | 0        |
| 0        | 0        | 0        | 0        | 0        | 0        | 0        | 0        | 0        |
| 0        | 0        | 0        | 0        | 0        | 0        | 0        | 0        | 0        |
| 0        | 0        | 0        | 0        | 0        | 0        | 0        | 0        | 0        |
| 0        | 0        | 0        | 0        | 0        | 0        | 0        | 0        | 0        |
| 4.012227 | 0.842986 | 6.042471 | 1.676319 | 2.26834  | 11.38996 | 4.231017 | 1.528314 | 1.759974 |
| 3.581081 | 0        | 1.013514 | 1.576577 | 1.142214 | 0.569498 | 4.179537 | 1.293436 | 1.753539 |
| 3.581081 | 0        | 1.013514 | 1.576577 | 1.142214 | 0.569498 | 4.179537 | 1.293436 | 1.753539 |

| P059     | P060     | P061     | P062     | P063     | P064     | P065     | P066     | P067     |
|----------|----------|----------|----------|----------|----------|----------|----------|----------|
| 0        | 0        | 0        | 0        | 0        | 0        | 0        | 0        | 0        |
| 0        | 0        | 0        | 0        | 0        | 0        | 0        | 0        | 0        |
| 0.756113 | 12.34234 | 0.263835 | 3.970399 | 0.006435 | 6.972329 | 0        | 2.13964  | 0.006435 |
| 0.003218 | 0.003218 | 0        | 0        | 0        | 0        | 0        | 0        | 0        |
| 0.003218 | 0.003218 | 0        | 0        | 0        | 0        | 0        | 0        | 0        |
| 0        | 12.33912 | 0        | 0.353925 | 0.006435 | 6.415701 | 0        | 0        | 0.003218 |
| 0        | 12.33912 | 0        | 0.353925 | 0.006435 | 6.415701 | 0        | 0        | 0.003218 |
| 0        | 0        | 0        | 2.91184  | 0        | 0        | 0        | 2.133205 | 0.003218 |
| 0        | 0        | 0        | 2.91184  | 0        | 0        | 0        | 2.133205 | 0.003218 |
| 0        | 0        | 0        | 0        | 0        | 0        | 0        | 0        | 0        |
| 0        | 0        | 0        | 0        | 0        | 0        | 0        | 0        | 0        |
| 0        | 0.009653 | 0        | 0.003218 | 0        | 0        | 0.241313 | 0        | 0.009653 |
| 0        | 0        | 0.035393 | 0        | 0.176963 | 0        | 0        | 0        | 0        |
| 0        | 0        | 0.035393 | 0        | 0.176963 | 0        | 0        | 0        | 0        |
| 0.022523 | 0.656371 | 0.344273 | 0.778636 | 0.28314  | 0.318533 | 0        | 0.028958 | 0.408623 |
| 0.022523 | 0.656371 | 0.344273 | 0.778636 | 0.28314  | 0.318533 | 0        | 0.028958 | 0.408623 |
| 0.03861  | 0.119048 | 0.900901 | 0.653153 | 1.013514 | 0.955598 | 0.003218 | 1.821107 | 0        |
| 0.03861  | 0.119048 | 0.900901 | 0.653153 | 1.013514 | 0.955598 | 0.003218 | 1.821107 | 0        |
| 0.02574  | 0.019305 | 0.144788 | 0.093308 | 0.045045 | 0.045045 | 0.006435 | 0.01287  | 0        |
| 0.02574  | 0.019305 | 0.144788 | 0.093308 | 0.045045 | 0.045045 | 0.006435 | 0.01287  | 0        |
| 0.009653 | 0.659588 | 0.173745 | 0.131918 | 0.11583  | 0.125483 | 0.341055 | 1.718147 | 0.016088 |
| 0.009653 | 0.659588 | 0.173745 | 0.131918 | 0.11583  | 0.125483 | 0.341055 | 1.718147 | 0.016088 |
| 15.33462 | 8.104891 | 31.6731  | 34.58816 | 25.78507 | 28.38803 | 0.916988 | 8.120978 | 24.54955 |
| 1.985199 | 4.83269  | 22.85393 | 19.21815 | 17.75418 | 13.19176 | 0.009653 | 3.658301 | 20.05148 |
| 1.985199 | 4.83269  | 22.85393 | 19.21815 | 17.75418 | 13.19176 | 0.009653 | 3.658301 | 20.05148 |
| 0.151223 | 0.106178 | 0.006435 | 0.302445 | 0        | 1.119691 | 0        | 0        | 0        |
| 0.151223 | 0.106178 | 0.006435 | 0.302445 | 0        | 1.119691 | 0        | 0        | 0        |
| 2.419562 | 0.318533 | 2.78314  | 1.650579 | 0.768983 | 3.507079 | 0        | 0.791506 | 0.035393 |
| 2.419562 | 0.318533 | 2.78314  | 1.650579 | 0.768983 | 3.507079 | 0        | 0.791506 | 0.035393 |
| 0        | 0        | 0        | 0        | 0        | 0        | 0        | 0        | 0        |
| 0        | 0        | 0        | 0        | 0        | 0        | 0        | 0        | 0        |
| 2.35843  | 6.512227 | 2.580438 | 1.180824 | 1.068211 | 2.70592  | 11.48649 | 4.543115 | 4.777992 |
| 0        | 0        | 0        | 0        | 0        | 0        | 0        | 0        | 0        |
| 0        | 0        | 0        | 0        | 0        | 0        | 0        | 0        | 0        |
| 0        | 0        | 0        | 0        | 0        | 0        | 0        | 0        | 0        |
| 0        | 0        | 0        | 0        | 0        | 0        | 0        | 0        | 0        |
| 0        | 0        | 0        | 0        | 0        | 0        | 0        | 0        | 0        |
| 0        | 0        | 0        | 0        | 0        | 0        | 0        | 0        | 0        |
| 0        | 0        | 0        | 0        | 0        | 0        | 0        | 0        | 0        |
| 0        | 0        | 0        | 0        | 0        | 0        | 0        | 0        | 0        |
| 0        | 0        | 0        | 0        | 0        | 0        | 0        | 0        | 0        |
| 0        | 0        | 0        | 0        | 0        | 0        | 0        | 0        | 0        |
| 2.146075 | 5.495496 | 2.08816  | 0.913771 | 0.823681 | 2.261905 | 11.48649 | 3.880309 | 4.777992 |
| 1.933719 | 4.388674 | 1.267696 | 0.888031 | 0.003218 | 2.01094  | 4.301802 | 0.965251 | 3.809524 |
| 1.933719 | 4.388674 | 1.267696 | 0.888031 | 0.003218 | 2.01094  | 4.301802 | 0.965251 | 3.809524 |

| P068     | P069     | P070     | P071     | P072     | P073     | P074     | P075     | P076     |   |
|----------|----------|----------|----------|----------|----------|----------|----------|----------|---|
| 0        | 0        | 0        | 0        | 0        | 0        | 0        | 0.028958 | 0        | 0 |
| 0        | 0        | 0        | 0        | 0        | 0        | 0        | 0        | 0        | 0 |
| 0.009653 | 0.170528 | 0.009653 | 1.029601 | 0.006435 | 0.006435 | 0.135135 | 0.006435 | 36.5991  |   |
| 0        | 0        | 0        | 0.736808 | 0        | 0        | 0        | 0        | 0        |   |
| 0        | 0        | 0        | 0.736808 | 0        | 0        | 0        | 0        | 0        |   |
| 0        | 0        | 0        | 0        | 0.003218 | 0        | 0        | 0        | 4.379022 |   |
| 0        | 0        | 0        | 0        | 0.003218 | 0        | 0        | 0        | 4.379022 |   |
| 0.009653 | 0.003218 | 0.006435 | 0.003218 | 0.003218 | 0.003218 | 0.01287  | 0.003218 | 30.87838 |   |
| 0.009653 | 0.003218 | 0.006435 | 0.003218 | 0.003218 | 0.003218 | 0.01287  | 0.003218 | 30.87838 |   |
| 0        | 0        | 0        | 0        | 0        | 0        | 0        | 0        | 0        |   |
| 0        | 0        | 0        | 0        | 0        | 0        | 0        | 0        | 0        |   |
| 0        | 0        | 0        | 0        | 0        | 0        | 0        | 0        | 0.009653 |   |
| 0        | 0        | 0        | 0        | 0        | 0        | 0        | 0        | 0        |   |
| 0        | 0        | 0        | 0        | 0        | 0        | 0        | 0        | 0        |   |
| 0.42471  | 0.518018 | 0.003218 | 0.582368 | 0.003218 | 0.109395 | 0.814028 | 0.324968 | 0.099743 |   |
| 0.42471  | 0.518018 | 0.003218 | 0.582368 | 0.003218 | 0.109395 | 0.814028 | 0.324968 | 0.099743 |   |
| 2.451737 | 1.846847 | 1.222651 | 0.733591 | 4.259974 | 0.846203 | 3.610039 | 0.630631 | 0.070785 |   |
| 2.451737 | 1.846847 | 1.222651 | 0.733591 | 4.259974 | 0.846203 | 3.610039 | 0.630631 | 0.070785 |   |
| 0.054698 | 0.15444  | 0        | 0.045045 | 0.11583  | 0.003218 | 0.07722  | 0.21879  | 0.067568 |   |
| 0.054698 | 0.15444  | 0        | 0.045045 | 0.11583  | 0.003218 | 0.07722  | 0.21879  | 0.067568 |   |
| 0.057915 | 0.627413 | 0.189833 | 0.01287  | 0.627413 | 0.186615 | 0.003218 | 0.119048 | 0        |   |
| 0.057915 | 0.627413 | 0.189833 | 0.01287  | 0.627413 | 0.186615 | 0.003218 | 0.119048 | 0        |   |
| 18.00837 | 28.70013 | 25.96525 | 29.33076 | 24.58816 | 19.18275 | 13.49743 | 23.81274 | 10.98777 |   |
| 10.86229 | 10.66924 | 13.90605 | 14.71042 | 13.77413 | 17.19434 | 4.835907 | 10.28636 | 6.907979 |   |
| 10.86229 | 10.66924 | 13.90605 | 14.71042 | 13.77413 | 17.19434 | 4.835907 | 10.28636 | 6.907979 |   |
| 0.688546 | 0.3861   | 4.269627 | 0.215573 | 0.749678 | 0        | 0.447233 | 1.151866 | 0.659588 |   |
| 0.688546 | 0.3861   | 4.269627 | 0.215573 | 0.749678 | 0        | 0.447233 | 1.151866 | 0.659588 |   |
| 0.691763 | 4.314672 | 0.009653 | 6.261261 | 1.637709 | 0.045045 | 1.869369 | 2.635135 | 2.07529  |   |
| 0.691763 | 4.314672 | 0.009653 | 6.261261 | 1.637709 | 0.045045 | 1.869369 | 2.635135 | 2.07529  |   |
| 0        | 0        | 0        | 0        | 0.003218 | 0        | 0.009653 | 0        | 0        |   |
| 0        | 0        | 0        | 0        | 0.003218 | 0        | 0.009653 | 0        | 0        |   |
| 1.669884 | 0.965251 | 5.511583 | 1.258044 | 10.35071 | 3.114543 | 1.705277 | 0.743243 | 7.631918 |   |
| 0        | 0        | 0        | 0        | 0        | 0        | 0        | 0        | 0        |   |
| 0        | 0        | 0        | 0        | 0        | 0        | 0        | 0        | 0        |   |
| 0        | 0        | 0        | 0        | 0        | 0        | 0        | 0        | 0        |   |
| 0        | 0        | 0        | 0        | 0        | 0        | 0        | 0        | 0        |   |
| 0        | 0        | 0        | 0        | 0        | 0        | 0        | 0        | 0        |   |
| 0        | 0        | 0        | 0        | 0        | 0        | 0        | 0        | 0        |   |
| 0        | 0        | 0        | 0        | 0        | 0        | 0        | 0        | 0        |   |
| 0        | 0        | 0        | 0        | 0        | 0        | 0        | 0        | 0        |   |
| 0        | 0        | 0        | 0        | 0        | 0        | 0        | 0        | 0        |   |
| 0        | 0        | 0        | 0        | 0        | 0        | 0        | 0        | 0        |   |
| 0        | 0        | 0        | 0        | 0        | 0        | 0        | 0        | 0        |   |
| 0        | 0        | 0        | 0        | 0        | 0        | 0        | 0        | 0        |   |
| 1.447876 | 0.823681 | 5.23166  | 0.913771 | 10.09653 | 3.114543 | 1.090734 | 0.228443 | 6.833977 |   |
| 1.132561 | 0.582368 | 4.083012 | 0.48906  | 0.659588 | 2.454955 | 0.852638 | 0.06435  | 2.863578 |   |
| 1.132561 | 0.582368 | 4.083012 | 0.48906  | 0.659588 | 2.454955 | 0.852638 | 0.06435  | 2.863578 |   |

| P077     | P078     | P079     | P080     | P081     | P082     | P083     | P084     | P085     |
|----------|----------|----------|----------|----------|----------|----------|----------|----------|
| 0        | 0.05148  | 0        | 0        | 0        | 0        | 0        | 0        | 0        |
| 0        | 0        | 0        | 0        | 0        | 0        | 0        | 0        | 0        |
| 9.97426  | 3.947876 | 0.006435 | 1.229086 | 0.019305 | 0.003218 | 50.65959 | 68.28507 | 3.822394 |
| 0        | 0        | 0        | 0        | 0        | 0        | 0        | 0        | 0        |
| 0        | 0        | 0        | 0        | 0        | 0        | 0        | 0        | 0        |
| 0        | 0        | 0        | 0        | 0        | 0        | 7.046332 | 14.44659 | 3.822394 |
| 0        | 0        | 0        | 0        | 0        | 0        | 7.046332 | 14.44659 | 3.822394 |
| 9.97426  | 3.944659 | 0.006435 | 0.006435 | 0.003218 | 0.003218 | 43.61326 | 53.12098 | 0        |
| 9.97426  | 3.944659 | 0.006435 | 0.006435 | 0.003218 | 0.003218 | 43.61326 | 53.12098 | 0        |
| 0        | 0        | 0        | 0.723938 | 0.003218 | 0        | 0        | 0.711068 | 0        |
| 0        | 0        | 0        | 0.723938 | 0.003218 | 0        | 0        | 0.711068 | 0        |
| 0.003218 | 0        | 0.016088 | 0        | 0        | 0        | 0        | 0        | 0        |
| 0.045045 | 0        | 0        | 0        | 0        | 0        | 0        | 0        | 0        |
| 0.045045 | 0        | 0        | 0        | 0        | 0        | 0        | 0        | 0        |
| 0.157658 | 0.698198 | 0.382883 | 0.183398 | 0        | 1.026384 | 0.14157  | 0.10296  | 0.035393 |
| 0.157658 | 0.698198 | 0.382883 | 0.183398 | 0        | 1.026384 | 0.14157  | 0.10296  | 0.035393 |
| 0.949163 | 0.601673 | 2.709138 | 2.741313 | 1.058559 | 2.181467 | 0.196268 | 0.260618 | 0.260618 |
| 0.949163 | 0.601673 | 2.709138 | 2.741313 | 1.058559 | 2.181467 | 0.196268 | 0.260618 | 0.260618 |
| 0.057915 | 0.06435  | 0.160875 | 0.09009  | 0.028958 | 0.24453  | 0.03861  | 0.006435 | 0.009653 |
| 0.057915 | 0.06435  | 0.160875 | 0.09009  | 0.028958 | 0.24453  | 0.03861  | 0.006435 | 0.009653 |
| 0.041828 | 0.164093 | 0.135135 | 0.041828 | 0.119048 | 0.759331 | 0.009653 | 0.611326 | 0.032175 |
| 0.041828 | 0.164093 | 0.135135 | 0.041828 | 0.119048 | 0.759331 | 0.009653 | 0.611326 | 0.032175 |
| 30.82046 | 29.8166  | 46.25483 | 29.09588 | 26.55084 | 21.77284 | 8.873874 | 6.772844 | 6.309524 |
| 15.91055 | 16.77606 | 3.719434 | 20.48584 | 16.65701 | 17.80888 | 5        | 5.33462  | 5.39897  |
| 15.91055 | 16.77606 | 3.719434 | 20.48584 | 16.65701 | 17.80888 | 5        | 5.33462  | 5.39897  |
| 1.155084 | 0.688546 | 0.569498 | 5.074003 | 1.026384 | 0.057915 | 1.869369 | 0.836551 | 0        |
| 1.155084 | 0.688546 | 0.569498 | 5.074003 | 1.026384 | 0.057915 | 1.869369 | 0.836551 | 0        |
| 2.506435 | 2.055985 | 7.56435  | 1.161519 | 2.83462  | 0.028958 | 0.23166  | 0.003218 | 0.01287  |
| 2.506435 | 2.055985 | 7.56435  | 1.161519 | 2.83462  | 0.028958 | 0.23166  | 0.003218 | 0.01287  |
| 0        | 0        | 0.003218 | 0        | 0        | 0        | 0        | 0        | 0        |
| 0        | 0        | 0.003218 | 0        | 0        | 0        | 0        | 0        | 0        |
| 2.120335 | 7.65444  | 2.606178 | 3.487774 | 1.299871 | 2.61583  | 1.698842 | 2.892535 | 6.270914 |
| 0        | 0        | 0        | 0.955598 | 0        | 0        | 0        | 0        | 0        |
| 0        | 0        | 0        | 0.955598 | 0        | 0        | 0        | 0        | 0        |
| 0        | 0        | 0        | 0.955598 | 0        | 0        | 0        | 0        | 0        |
| 0        | 0        | 0        | 0        | 0        | 0        | 0        | 0        | 0        |
| 0        | 0        | 0        | 0        | 0        | 0        | 0        | 0        | 0        |
| 0        | 0        | 0        | 0        | 0        | 0        | 0        | 0        | 0        |
| 0        | 0        | 0        | 0        | 0        | 0        | 0        | 0        | 0        |
| 0        | 0        | 0        | 0        | 0        | 0        | 0        | 0        | 0        |
| 0        | 0        | 0        | 0        | 0        | 0        | 0        | 0        | 0        |
| 1.679537 | 7.38417  | 2.197555 | 2.483913 | 1.019949 | 2.52574  | 1.509009 | 2.844273 | 6.071429 |
| 0.723938 | 0.817246 | 1.611969 | 1.953024 | 0.994208 | 1.557272 | 0.666023 | 2.313385 | 0.045045 |
| 0.723938 | 0.817246 | 1.611969 | 1.953024 | 0.994208 | 1.557272 | 0.666023 | 2.313385 | 0.045045 |



| P086     | P087     | P088     | P089     | P090     | P092     | P093     | P094     | P095     |
|----------|----------|----------|----------|----------|----------|----------|----------|----------|
| 0.01287  | 0        | 0        | 0        | 0        | 0.009653 | 0        | 0        | 0        |
| 0        | 0        | 0        | 0        | 0        | 0        | 0        | 0        | 0        |
| 25.2574  | 0.022523 | 52.59009 | 0.028958 | 49.95495 | 35.54698 | 0.02574  | 23.37516 | 62.90541 |
| 0        | 0        | 0        | 0        | 0        | 0        | 0        | 0        | 0.003218 |
| 0        | 0        | 0        | 0        | 0        | 0        | 0        | 0        | 0.003218 |
| 0        | 0        | 0.006435 | 0        | 5.357143 | 4.137709 | 0.006435 | 0.048263 | 2.207207 |
| 0        | 0        | 0.006435 | 0        | 5.357143 | 4.137709 | 0.006435 | 0.048263 | 2.207207 |
| 25.2574  | 0.022523 | 52.52574 | 0.009653 | 43.57786 | 31.40605 | 0.019305 | 23.32368 | 60.07722 |
| 25.2574  | 0.022523 | 52.52574 | 0.009653 | 43.57786 | 31.40605 | 0.019305 | 23.32368 | 60.07722 |
| 0        | 0        | 0        | 0        | 0.19305  | 0        | 0        | 0        | 0        |
| 0        | 0        | 0        | 0        | 0.19305  | 0        | 0        | 0        | 0        |
| 0        | 1.965894 | 0        | 0        | 0        | 0        | 0.009653 | 0.09009  | 0        |
| 0.003218 | 0.028958 | 0        | 0        | 0        | 0.003218 | 0        | 0        | 0        |
| 0.003218 | 0.028958 | 0        | 0        | 0        | 0.003218 | 0        | 0        | 0        |
| 0.135135 | 0.492278 | 0.138353 | 0.862291 | 0.42471  | 0.202703 | 0.067568 | 0.186615 | 0.2574   |
| 0.135135 | 0.492278 | 0.138353 | 0.862291 | 0.42471  | 0.202703 | 0.067568 | 0.186615 | 0.2574   |
| 0.238095 | 4.382239 | 0.653153 | 6.763192 | 0.135135 | 0.2574   | 0.492278 | 2.175032 | 0.16731  |
| 0.238095 | 4.382239 | 0.653153 | 6.763192 | 0.135135 | 0.2574   | 0.492278 | 2.175032 | 0.16731  |
| 0.019305 | 0        | 0.083655 | 0.06435  | 0.022523 | 0.032175 | 0.057915 | 0.009653 | 0.06435  |
| 0.019305 | 0        | 0.083655 | 0.06435  | 0.022523 | 0.032175 | 0.057915 | 0.009653 | 0.06435  |
| 0.086873 | 3.034106 | 0.003218 | 0.579151 | 0.33462  | 0.006435 | 0.061133 | 0.279923 | 0.01287  |
| 0.086873 | 3.034106 | 0.003218 | 0.579151 | 0.33462  | 0.006435 | 0.061133 | 0.279923 | 0.01287  |
| 14.1184  | 10.26384 | 15.29923 | 31.84041 | 21.63449 | 15.95238 | 12.23295 | 10.9009  | 8.918919 |
| 7.815315 | 7.79601  | 7.004505 | 22.90541 | 16.33205 | 8.825611 | 7.93758  | 10.17053 | 7.483912 |
| 7.815315 | 7.79601  | 7.004505 | 22.90541 | 16.33205 | 8.825611 | 7.93758  | 10.17053 | 7.483912 |
| 1.048906 | 0        | 0.112613 | 0.003218 | 0.19305  | 0.144788 | 0.913771 | 0        | 0.009653 |
| 1.048906 | 0        | 0.112613 | 0.003218 | 0.19305  | 0.144788 | 0.913771 | 0        | 0.009653 |
| 1.679537 | 1.386744 | 1.721364 | 2.74453  | 1.029601 | 0.920206 | 0.370013 | 0.23166  | 0.318533 |
| 1.679537 | 1.386744 | 1.721364 | 2.74453  | 1.029601 | 0.920206 | 0.370013 | 0.23166  | 0.318533 |
| 0        | 0        | 0        | 0        | 0        | 0        | 0        | 0        | 0        |
| 0        | 0        | 0        | 0        | 0        | 0        | 0        | 0        | 0        |
| 3.593951 | 2.261905 | 1.364221 | 4.765122 | 3.185328 | 3.918919 | 3.610039 | 4.259974 | 3.471686 |
| 0        | 0        | 0        | 0        | 0        | 0        | 0        | 0        | 0        |
| 0        | 0        | 0        | 0        | 0        | 0        | 0        | 0        | 0        |
| 0        | 0        | 0        | 0        | 0        | 0        | 0        | 0        | 0        |
| 0        | 0        | 0        | 0        | 0        | 0        | 0        | 0        | 0        |
| 0        | 0        | 0        | 0        | 0        | 0        | 0        | 0        | 0        |
| 0        | 0        | 0        | 0        | 0        | 0        | 0        | 0        | 0        |
| 0        | 0        | 0        | 0        | 0        | 0        | 0        | 0        | 0        |
| 0        | 0        | 0        | 0        | 0        | 0        | 0        | 0        | 0        |
| 0        | 0        | 0        | 0        | 0.02574  | 0        | 0        | 0        | 0        |
| 0        | 0        | 0        | 0        | 0.02574  | 0        | 0        | 0        | 0        |
| 3.259331 | 2.258687 | 1.287001 | 4.424067 | 2.921493 | 3.745174 | 3.439511 | 4.253539 | 3.471686 |
| 2.213642 | 1.003861 | 1.010296 | 2.631918 | 1.685972 | 3.484556 | 2.207207 | 0.907336 | 2.187902 |
| 2.213642 | 1.003861 | 1.010296 | 2.631918 | 1.685972 | 3.484556 | 2.207207 | 0.907336 | 2.187902 |

| P096     | P097     | P099     | P100     | P101     | P102     | P103     | P104     |
|----------|----------|----------|----------|----------|----------|----------|----------|
| 0        | 0        | 0        | 0        | 0        | 0        | 0        | 0        |
| 0        | 0        | 0        | 0        | 0        | 0        | 0        | 0        |
| 15.14157 | 40.87838 | 0.016088 | 0.07722  | 2.80888  | 73.53604 | 0.849421 | 0.009653 |
| 0        | 0.003218 | 0        | 0        | 0        | 0        | 0        | 0        |
| 0        | 0.003218 | 0        | 0        | 0        | 0        | 0        | 0        |
| 0        | 0        | 0        | 0.003218 | 0.05148  | 7.612613 | 0.054698 | 0.003218 |
| 0        | 0        | 0        | 0.003218 | 0.05148  | 7.612613 | 0.054698 | 0.003218 |
| 15.14157 | 40.86873 | 0.01287  | 0.074003 | 0.646718 | 65.85264 | 0.791506 | 0.006435 |
| 15.14157 | 40.86873 | 0.01287  | 0.074003 | 0.646718 | 65.85264 | 0.791506 | 0.006435 |
| 0        | 0        | 0        | 0        | 0        | 0        | 0        | 0        |
| 0        | 0        | 0        | 0        | 0        | 0        | 0        | 0        |
| 0        | 0        | 0        | 0        | 0        | 0        | 0        | 0.572716 |
| 0        | 0        | 0        | 0        | 0        | 0        | 0        | 0        |
| 0        | 0        | 0        | 0        | 0        | 0        | 0        | 0        |
| 0.250965 | 0.186615 | 0        | 0.086873 | 0.305663 | 0.086873 | 0.563063 | 0.643501 |
| 0.250965 | 0.186615 | 0        | 0.086873 | 0.305663 | 0.086873 | 0.563063 | 0.643501 |
| 0.199485 | 0.871943 | 0.453668 | 0.485843 | 0.209138 | 0.21879  | 0.42471  | 1.103604 |
| 0.199485 | 0.871943 | 0.453668 | 0.485843 | 0.209138 | 0.21879  | 0.42471  | 1.103604 |
| 0.009653 | 0.032175 | 0.02574  | 0.03861  | 0        | 0.01287  | 0.006435 | 0        |
| 0.009653 | 0.032175 | 0.02574  | 0.03861  | 0        | 0.01287  | 0.006435 | 0        |
| 0.176963 | 0.019305 | 0.022523 | 0.009653 | 2.123552 | 0.106178 | 0.267053 | 0.24453  |
| 0.176963 | 0.019305 | 0.022523 | 0.009653 | 2.123552 | 0.106178 | 0.267053 | 0.24453  |
| 4.694337 | 16.21943 | 26.75032 | 9.475547 | 14.99678 | 8.729086 | 3.516731 | 3.902831 |
| 2.47426  | 9.810167 | 13.34299 | 4.942085 | 11.86293 | 7.232947 | 2.413127 | 2.454955 |
| 2.47426  | 9.810167 | 13.34299 | 4.942085 | 11.86293 | 7.232947 | 2.413127 | 2.454955 |
| 0        | 0.003218 | 0.209138 | 0.003218 | 0.016088 | 0.048263 | 0        | 0        |
| 0        | 0.003218 | 0.209138 | 0.003218 | 0.016088 | 0.048263 | 0        | 0        |
| 0.186615 | 1.036036 | 1.467181 | 0.238095 | 0.559846 | 0.357143 | 0.16731  | 0.016088 |
| 0.186615 | 1.036036 | 1.467181 | 0.238095 | 0.559846 | 0.357143 | 0.16731  | 0.016088 |
| 0        | 0        | 0        | 0        | 0.016088 | 0        | 0        | 0        |
| 0        | 0        | 0        | 0        | 0.016088 | 0        | 0        | 0        |
| 1.438224 | 2.149292 | 1.290219 | 4.629987 | 3.285071 | 1.110039 | 3.803089 | 5.392535 |
| 0        | 0.003218 | 0        | 0        | 0        | 0        | 0        | 0        |
| 0        | 0.003218 | 0        | 0        | 0        | 0        | 0        | 0        |
| 0        | 0.003218 | 0        | 0        | 0        | 0        | 0        | 0        |
| 0        | 0        | 0        | 0        | 0        | 0        | 0        | 0        |
| 0        | 0        | 0        | 0        | 0        | 0        | 0        | 0        |
| 0        | 0        | 0        | 0        | 0        | 0        | 0        | 0        |
| 0        | 0        | 0        | 0        | 0        | 0        | 0        | 0        |
| 0        | 0        | 0        | 0        | 0        | 0        | 0        | 0        |
| 0        | 0        | 0        | 0        | 0        | 0        | 0        | 0        |
| 0        | 0        | 0        | 0        | 0        | 0        | 0        | 0        |
| 1.396396 | 1.840412 | 1.077864 | 0.292793 | 2.715573 | 1.029601 | 3.474904 | 5.01287  |
| 0.846203 | 1.373874 | 0.781853 | 0.286358 | 1.113256 | 0.701416 | 1.595882 | 0.003218 |
| 0.846203 | 1.373874 | 0.781853 | 0.286358 | 1.113256 | 0.701416 | 1.595882 | 0.003218 |

**Supplementary Table 8** Distinguished bacterial genus between pairs of healthy and PCOS

| Genus                              | PCOS-HB     | PCOS-LB     | p value     | Fold change |
|------------------------------------|-------------|-------------|-------------|-------------|
| Alistipes                          | 0.010559847 | 0.014968095 | 0.014316469 | 1.417453796 |
| Butyricimonas                      | 0.001181469 | 0.002325989 | 0.036720705 | 1.968726202 |
| Enterorhabdus                      | 0.000900259 | 0.000849959 | 0.002441721 | 0.944126895 |
| Erysipelotrichaceae_UCG.003        | 0.00617632  | 0.002914522 | 0.03034363  | 0.471886457 |
| Eubacterium._nodatum_group         | 7.65771E-05 | 0.000114629 | 0.032125587 | 1.496913969 |
| Eubacterium._ventriosum_group      | 0.000866797 | 0.00166305  | 0.019937985 | 1.91861456  |
| Family_XIII_UCG.001                | 0.000209141 | 0.000322422 | 0.040423451 | 1.541648501 |
| Holdemania                         | 5.27775E-05 | 0.000115305 | 0.020117381 | 2.184742157 |
| Lachnoclostridium                  | 0.025337194 | 0.015814028 | 0.014495952 | 0.624142833 |
| Oscillibacter                      | 0.000715574 | 0.001650986 | 0.041959567 | 2.307219368 |
| Ruminococcaceae_UCG.002            | 0.002538613 | 0.003822798 | 0.02381716  | 1.505861187 |
| Sellimonas                         | 9.00966E-05 | 0.000341192 | 0.004388034 | 3.786963713 |
| Terrisporobacter                   | 0.000299234 | 0.00076617  | 0.037028739 | 2.560435356 |
| Turicibacter                       | 0.000143505 | 0.000496035 | 0.017002465 | 3.456569517 |
| Tyzzarella                         | 0.000351353 | 0.000195732 | 0.026499969 | 0.55708242  |
| un_f_Christensenellaceae           | 3.2178E-05  | 2.81609E-05 | 0.037571621 | 0.875160669 |
| un_f_Clostridiales_vadinBB60_group | 0.000166669 | 0.000229253 | 0.033102623 | 1.375503549 |
| un f Flavobacteriaceae             | 1.02985E-05 | 9.38464E-05 | 0.039548591 | 9.112631694 |

| Genus                        | Healthy     | PCOS-LB     | p value     | Fold change |
|------------------------------|-------------|-------------|-------------|-------------|
| Alistipes                    | 0.010559847 | 0.014968095 | 0.014891748 | 1.417453796 |
| Alloprevotella               | 0.00039318  | 0.000567757 | 0.042784735 | 1.444010974 |
| Catenibacterium              | 0.000377736 | 0.000229918 | 0.016826599 | 0.608673005 |
| Dorea                        | 0.00237838  | 0.002504294 | 0.006829676 | 1.052940716 |
| Gemella                      | 0.00002446  | 3.35208E-05 | 0.028063874 | 1.370434723 |
| Granulicatella               | 0.000123561 | 6.30234E-05 | 0.002811083 | 0.510061119 |
| Lachnospiraceae_FCS020_group | 0.000410558 | 0.000523514 | 0.023129464 | 1.275126816 |
| Lachnospiraceae_UCG.008      | 9.07415E-05 | 0.000130054 | 0.0475425   | 1.43323287  |
| Lactococcus                  | 2.50995E-05 | 7.10542E-05 | 0.042518198 | 2.830902176 |
| Mailhella                    | 0.000005148 | 0           | 0.010400226 | 0           |
| Megamonas                    | 0.025711716 | 0.016605671 | 0.020880066 | 0.645840634 |
| Prevotella_9                 | 0.086876453 | 0.058508287 | 0.000519224 | 0.673465413 |
| Romboutsia                   | 0.004613901 | 0.014152993 | 0.003880624 | 3.06746811  |
| Ruminococcus._gavreaii_group | 0.000915704 | 0.001059768 | 0.016468778 | 1.157325733 |
| Slackia                      | 8.3675E-06  | 2.48011E-05 | 0.007703576 | 2.963975202 |
| un_f_Muribaculaceae          | 0.00680567  | 0.011575645 | 0.040895907 | 1.700882417 |

| Genus                         | Healthy     | PCOS-HB     | p value     | Fold Change |
|-------------------------------|-------------|-------------|-------------|-------------|
| Dorea                         | 0.003719603 | 0.00237838  | 0.026683996 | 0.639417805 |
| Enterorhabdus                 | 0.00027349  | 0.000900259 | 0.010117397 | 3.291746972 |
| Escherichia.Shigella          | 0.0042742   | 0.023231663 | 0.006024062 | 5.435324715 |
| Eubacterium._ventriosum_group | 0.001557949 | 0.000866797 | 0.000716431 | 0.556370623 |
| Faecalibacterium              | 0.110499221 | 0.085180823 | 0.049182509 | 0.770872612 |
| Family_XIII_AD3011_group      | 0.00064943  | 0.000319822 | 0.047773449 | 0.492465741 |
| Fournierella                  | 0.000114306 | 0           | 0.04590338  | 0           |
| Fusicatenibacter              | 0.012491533 | 0.008484559 | 0.041479089 | 0.679224805 |
| Granulicatella                | 2.2023E-05  | 0.000123561 | 0.003806576 | 5.610516839 |
| Holdemania                    | 8.72158E-05 | 5.27775E-05 | 0.016965696 | 0.605136986 |
| Lachnoclostridium             | 0.016980797 | 0.025337194 | 0.016735821 | 1.492108709 |
| Lachnospiraceae_FCS020_group  | 0.000837398 | 0.000410558 | 0.009270827 | 0.490278596 |
| Lachnospiraceae_NC2004_group  | 0.000319213 | 8.23701E-05 | 0.031509937 | 0.258040758 |
| Lachnospiraceae_UCG.008       | 0.000180355 | 9.07415E-05 | 0.00422163  | 0.503128231 |
| Lactobacillus                 | 3.38711E-05 | 0.002063066 | 0.014230467 | 60.90941614 |
| Mailhella                     | 0.00021083  | 0.000005148 | 0.039128867 | 0.024417722 |
| Marvinbryantia                | 0.000157499 | 0.000064999 | 0.023135122 | 0.412695373 |
| Prevotella_9                  | 0.120546303 | 0.086876453 | 0.002361622 | 0.720689486 |
| Ruminococcaceae_UCG.002       | 0.005613696 | 0.002538613 | 0.002242934 | 0.452217637 |
| Ruminococcaceae_UCG.004       | 0.001207413 | 0.000448521 | 0.003131237 | 0.371472653 |
| Ruminococcaceae_UCG.014       | 0.007713543 | 0.002390607 | 0.008201    | 0.30992338  |
| Ruminococcus._gavreaii_group  | 0.002712018 | 0.000915704 | 0.019068052 | 0.337646709 |
| Ruminococcus._gnavus_group    | 0.006745751 | 0.018780569 | 0.040609608 | 2.784058806 |
| Slackia                       | 0.000150718 | 8.3675E-06  | 0.001524613 | 0.055517638 |
| Subdoligranulum               | 0.023987333 | 0.012081082 | 0.008264837 | 0.503644231 |
| un_f_un_o_Rhodospirillales    | 0.001419089 | 0           | 0.008946566 | 0           |

**Supplementary Table 9** The NSTI values in each sample

| sample | NSTI Value  | sample | NSTI Value | sample | NSTI Value |
|--------|-------------|--------|------------|--------|------------|
| N1     | 0.058412968 | P009   | 0.0863645  | P059   | 0.085514   |
| N2     | 0.119318714 | P010   | 0.0495405  | P060   | 0.088162   |
| N3     | 0.102016305 | P012   | 0.0531846  | P061   | 0.06775    |
| N4     | 0.078835495 | P013   | 0.0750214  | P062   | 0.086563   |
| N5     | 0.057595868 | P014   | 0.0777947  | P063   | 0.06988    |
| N6     | 0.051654325 | P015   | 0.0829671  | P064   | 0.091297   |
| N7     | 0.081876984 | P016   | 0.0769928  | P065   | 0.063104   |
| N8     | 0.11612009  | P017   | 0.1005227  | P066   | 0.063333   |
| N10    | 0.080948006 | P018   | 0.0550401  | P067   | 0.059427   |
| N11    | 0.104409482 | P019   | 0.1233564  | P068   | 0.065123   |
| N12    | 0.06420647  | P020   | 0.0570762  | P069   | 0.08347    |
| N14    | 0.076460454 | P021   | 0.0949879  | P070   | 0.078079   |
| N15    | 0.113021002 | P022   | 0.0767652  | P071   | 0.078727   |
| N16    | 0.083497851 | P023   | 0.0941961  | P072   | 0.065415   |
| N17    | 0.078524469 | P024   | 0.0704757  | P073   | 0.052177   |
| N18    | 0.080045483 | P025   | 0.0781439  | P074   | 0.067124   |
| N19    | 0.090981758 | P026   | 0.0374375  | P075   | 0.078285   |
| N20    | 0.073084951 | P027   | 0.0497517  | P076   | 0.076578   |
| N21    | 0.070314408 | P028   | 0.0771082  | P077   | 0.079505   |
| N22    | 0.094734067 | P030   | 0.0551904  | P078   | 0.078677   |
| N23    | 0.059364002 | P031   | 0.0907671  | P079   | 0.109084   |
| N24    | 0.05287757  | P033   | 0.165063   | P080   | 0.099099   |
| N26    | 0.098681019 | P034   | 0.2237109  | P081   | 0.071556   |
| N27    | 0.062277964 | P035   | 0.0781268  | P082   | 0.063969   |
| N28    | 0.062313133 | P036   | 0.0555136  | P083   | 0.087311   |
| N29    | 0.096321335 | P037   | 0.0788318  | P084   | 0.097478   |
| N30    | 0.057479974 | P038   | 0.0725223  | P085   | 0.052127   |
| N31    | 0.081979752 | P039   | 0.0634507  | P086   | 0.074996   |
| N32    | 0.069778625 | P040   | 0.0707827  | P087   | 0.061534   |
| N33    | 0.069729591 | P041   | 0.0994683  | P088   | 0.098686   |
| N34    | 0.08015555  | P042   | 0.0653631  | P089   | 0.074242   |
| N35    | 0.059600968 | P043   | 0.1055916  | P090   | 0.093539   |
| N36    | 0.063750218 | P044   | 0.0831195  | P092   | 0.089554   |
| N37    | 0.083652224 | P045   | 0.0625346  | P093   | 0.063875   |
| N38    | 0.09325404  | P046   | 0.0404138  | P094   | 0.062211   |
| N39    | 0.099332087 | P047   | 0.0595481  | P095   | 0.085801   |
| N40    | 0.092003997 | P048   | 0.0608834  | P096   | 0.06095    |
| N41    | 0.083363487 | P049   | 0.0813149  | P097   | 0.085612   |
| P001   | 0.075599609 | P050   | 0.0402791  | P099   | 0.089855   |
| P002   | 0.051573806 | P051   | 0.1154136  | P100   | 0.050518   |
| P003   | 0.073272317 | P052   | 0.0719939  | P101   | 0.06246    |
| P004   | 0.065459978 | P053   | 0.0543146  | P102   | 0.100693   |
| P005   | 0.055174594 | P054   | 0.1804858  | P103   | 0.057169   |
| P006   | 0.106227175 | P056   | 0.0738778  | P104   | 0.046099   |
| P007   | 0.081019285 | P057   | 0.0579342  |        |            |
| P008   | 0.076251454 | P058   | 0.0749007  |        |            |

**Supplement Table 10** Distinguished metabolites between healthy and PCOS-HB

| sample                                                           | N10         | N11         | N12         | N16         | N18         |
|------------------------------------------------------------------|-------------|-------------|-------------|-------------|-------------|
| Group                                                            | Healthy     | Healthy     | Healthy     | Healthy     | Healthy     |
| PC (20:4/22:6)                                                   | 1571222.823 | 431169.7411 | 107274.7217 | 102932.2616 | 878515.2631 |
| D-Sphingosine                                                    | 157107185.2 | 94601395.81 | 85656184.29 | 162663601.6 | 96562675.54 |
| PC (18:3e/10:0)                                                  | 563054.2014 | 521737.0243 | 775216.9426 | 731007.8796 | 1136229.282 |
| 2-[1-(4-isobutylphenyl)ethyl]-5-(3-nitrophenyl)-1,3,4-oxadiazole | 7222751.363 | 3477844.914 | 4987251.653 | 5142830.121 | 1870244.57  |
| 1-(4-benzylpiperazino)-2-(pyridin-2-ylamino)propan-1-one         | 385714.3436 | 438069.4614 | 196391.0373 | 193130.181  | 243268.8934 |
| Caffeine                                                         | 3469713.281 | 3045413569  | 125209891.2 | 465515219.5 | 4627239.434 |
| LPC 17:2                                                         | 7522688.146 | 3034049.449 | 7285392.484 | 4829449.456 | 6501767.352 |
| all-cis-4,7,10,13,16-Docosapentaenoic acid                       | 10878619.41 | 10213167.7  | 7484861.367 | 7289931.52  | 13957121.04 |
| 1,7-bis(4-hydroxyphenyl)heptan-3-one                             | 473330.8135 | 483665.5301 | 398961.7755 | 420384.0557 | 402192.308  |
| N,N'-di[4-(2,6-dimethylmorpholino)phenyl]thiourea                | 1331210.87  | 310028.5328 | 2169413.212 | 1674489.453 | 2773249.806 |
| Lysopc 15:0                                                      | 24855668.49 | 6706526.82  | 10074304.12 | 21328516.72 | 19845023.27 |
| 5-(tert-butyl)-2-methyl-N-(5-methyl-3-isoxazolyl)-3-furamide     | 750937.428  | 630115.9534 | 1664402.83  | 1193387.598 | 433254.9597 |
| PC (14:1e/8:0)                                                   | 5450370.556 | 2767473.297 | 16671587.23 | 1182268.529 | 6192358.539 |
| 11- $\alpha$ -Hydroxy-17-methyltestosterone                      | 1678291.844 | 8703548.004 | 1370092.954 | 1069031.357 | 2640200.646 |
| PC (22:6e/19:1)                                                  | 829225.4984 | 532828.0568 | 513319.5885 | 506496.8121 | 468624.2752 |
| Noroxycodone-d3                                                  | 2272969.911 | 2246496.656 | 1322968.675 | 1271562.493 | 1806376.115 |
| Thiamine                                                         | 322605.4029 | 289347.5357 | 398897.8969 | 369557.1184 | 384278.7243 |
| Mesterolone                                                      | 7797133.607 | 15975696.89 | 8107387.199 | 4911645.187 | 13419164.17 |
| Argininosuccinic acid                                            | 109503.4199 | 238727.2685 | 233853.7494 | 139300.5815 | 280441.042  |
| Irganox 259                                                      | 3241697.897 | 815848.6239 | 10352707.1  | 6543773.577 | 13745280.12 |
| 3-(3,4,5-trimethoxyphenyl)propanoic acid                         | 688404411.3 | 1112900099  | 1656390252  | 137031457.4 | 377431730.3 |
| 4-methoxy-6-(prop-2-en-1-yl)-2H-1,3-benzodioxole                 | 17146230.65 | 13832238.11 | 23911265.2  | 4603440.412 | 15259869.29 |
| Acetylcarnitine                                                  | 2779396.521 | 2542821.054 | 1540974.821 | 1638611.251 | 2847342.274 |
| Agnuside                                                         | 820941.9788 | 93389.85899 | 104261.3556 | 112958.0891 | 223488.9406 |
| LPC 20:5                                                         | 25689784.42 | 26307161.77 | 47154959.27 | 7439831.367 | 3376159.559 |
| Estrone sulfate                                                  | 396844.0695 | 416290.6623 | 164943.0548 | 677269.6573 | 279903.429  |
| 5-Methoxyindole-3-Carbaldehyde                                   | 3656537.741 | 41708859.13 | 6231373.666 | 1828224.245 | 3601288.263 |
| 4-(octyloxy)benzoic acid                                         | 1718908.272 | 1338970.069 | 1177577.416 | 1230225.833 | 1549140.319 |
| LPC 22:1                                                         | 994971.5795 | 758306.436  | 4864686.541 | 475062.8745 | 2067237.013 |
| Guanidinosuccinic acid                                           | 1765622.551 | 1919252.866 | 5559889.42  | 1510991.011 | 2630847.559 |
| L-Cystine                                                        | 4521834.912 | 17571130    | 7106986.15  | 9105452.425 | 10111891.04 |
| Glu-Gln                                                          | 7623795.744 | 4409908.149 | 8354233.032 | 10013557.75 | 8755911.928 |
| LPC 18:2                                                         | 202690983.7 | 89684044.01 | 97231732.01 | 113027226.6 | 141603649.3 |
| Glycoursodeoxycholic acid                                        | 9657252.61  | 3513724.792 | 10666253.07 | 16287754.39 | 20388725.1  |
| ethyl 2-cyano-3-(tetrahydro-3-thiophenylamino)acrylate           | 5748109.449 | 7556518.917 | 5620638.424 | 12360882.98 | 15540099.69 |
| OxPC (16:0-20:3+10)                                              | 10598134.23 | 32433509.2  | 23906911.64 | 30189049.92 | 24465532.64 |
| Lysopc 18:1                                                      | 94959201.36 | 52230275.17 | 54967301.04 | 49655148.28 | 82778518.46 |
| Bilirubin                                                        | 479760.3575 | 13967073.78 | 64707475.81 | 55377587.11 | 391875.9812 |
| sample                                                           | P003        | P004        | P40         | P012        | P024        |
| Group                                                            | PCOS-HB     | PCOS-HB     | PCOS-HB     | PCOS-HB     | PCOS-HB     |
| PC (20:4/22:6)                                                   | 181889.726  | 95821.2821  | 170847.2234 | 1270936.401 | 2316624.738 |
| D-Sphingosine                                                    | 229425362.2 | 352185997   | 246389076.5 | 249183281.2 | 216558051.7 |
| PC (18:3e/10:0)                                                  | 556679.1607 | 663273.6047 | 1525458.472 | 4446694.177 | 8783130.325 |
| 2-[1-(4-isobutylphenyl)ethyl]-5-(3-nitrophenyl)-1,3,4-oxadiazole | 990954.7242 | 246780.7654 | 1776623.021 | 2062375.555 | 2442538.787 |
| 1-(4-benzylpiperazino)-2-(pyridin-2-ylamino)propan-1-one         | 158575.5664 | 257062.1221 | 458677.6184 | 946413.6721 | 1217876.852 |
| Caffeine                                                         | 2426569535  | 49669576.56 | 2073291649  | 787956698.7 | 4250393.941 |
| LPC 17:2                                                         | 1026398.333 | 3350856.612 | 3194727.397 | 3736643.487 | 1202489.838 |
| all-cis-4,7,10,13,16-Docosapentaenoic acid                       | 56329766.31 | 14501377.83 | 26921017.09 | 29420067.45 | 5467315.698 |
| 1,7-bis(4-hydroxyphenyl)heptan-3-one                             | 414388.7978 | 391282.9932 | 365741.272  | 386342.4334 | 524737.8863 |
| N,N'-di[4-(2,6-dimethylmorpholino)phenyl]thiourea                | 126126.9388 | 4135280.077 | 7429380.607 | 7577895.042 | 17203871.67 |
| Lysopc 15:0                                                      | 4811928.388 | 66004355.57 | 23530056.07 | 20496278.46 | 6994566.314 |
| 5-(tert-butyl)-2-methyl-N-(5-methyl-3-isoxazolyl)-3-furamide     | 471868.6505 | 1189099.678 | 489140.0877 | 766839.3271 | 521340.5652 |
| PC (14:1e/8:0)                                                   | 2606717.246 | 2562015.466 | 2111531.078 | 1553193.15  | 1824445.686 |
| 11- $\alpha$ -Hydroxy-17-methyltestosterone                      | 7097202.859 | 7885297.151 | 8079292.318 | 6063370.423 | 951465.6676 |
| PC (22:6e/19:1)                                                  | 2221121.984 | 594599.4593 | 1491034.045 | 601691.1947 | 2127975.925 |

|                                                        |             |             |             |             |             |
|--------------------------------------------------------|-------------|-------------|-------------|-------------|-------------|
| Noroxycodone-d3                                        | 725761.1497 | 1392832.035 | 2185195.082 | 5108315.269 | 13360399.27 |
| Thiamine                                               | 703224.0658 | 885791.9379 | 664216.1077 | 511342.1663 | 856299.0853 |
| Mesterolone                                            | 40513513.33 | 29151184.06 | 41085190.85 | 24247095.87 | 5827665.184 |
| Argininosuccinic acid                                  | 90189.61213 | 300096.6427 | 637529.8546 | 711535.2985 | 1103390.187 |
| Irganox 259                                            | 542155.9135 | 13826127.54 | 27076044.99 | 22107611.1  | 30969978.76 |
| 3-(3,4,5-trimethoxyphenyl)propanoic acid               | 53697437.63 | 495732671.3 | 366346326.5 | 314124145.6 | 207421750.6 |
| 4-methoxy-6-(prop-2-en-1-yl)-2H-1,3-benzodioxole       | 2579664.886 | 7332460.589 | 6703447.52  | 9246114.931 | 6883159.458 |
| Acetylcarnitine                                        | 9143789.309 | 10982654.54 | 9871153.787 | 5937195.229 | 3053500.483 |
| Agnuside                                               | 86059.98881 | 76961.0263  | 91294.5828  | 75659.91794 | 102674.1114 |
| LPC 20:5                                               | 3537034.17  | 14327735.44 | 14132135.84 | 22363221.66 | 3325442.898 |
| Estrone sulfate                                        | 1669590.501 | 1064493.166 | 718636.1116 | 493246.9848 | 802297.0542 |
| 5-Methoxyindole-3-Carbaldehyde                         | 2808624.034 | 4889602.756 | 4403795.503 | 2151393.917 | 2919634.025 |
| 4-(octyloxy)benzoic acid                               | 1000749.162 | 3647466.177 | 8819845.705 | 5231121.425 | 3483623.077 |
| LPC 22:1                                               | 460486.5024 | 418343.2203 | 580680.9551 | 484938.7655 | 578788.2791 |
| Guanidinosuccinic acid                                 | 1329699.778 | 420629.2758 | 1505223.364 | 464593.7531 | 1320290.792 |
| L-Cystine                                              | 23168081.8  | 33294851.97 | 34917440.94 | 19162115.41 | 14117129.86 |
| Glu-Gln                                                | 1586592.194 | 731737.2308 | 2944674.146 | 3651044.691 | 6731658.318 |
| LPC 18:2                                               | 30509088.36 | 36148056.77 | 70206563.12 | 51151849.4  | 43769856.71 |
| Glycoursodeoxycholic acid                              | 2863694.721 | 5123612.216 | 10827604.2  | 16280942.05 | 6180321.349 |
| ethyl 2-cyano-3-(tetrahydro-3-thiophenylamino)acrylate | 59365863.69 | 65823005.31 | 12204828.23 | 5728627.221 | 12939978.1  |
| OxPC (16:0-20:3+10)                                    | 17983750.62 | 7720348.201 | 18647728.15 | 16819243.25 | 23297776.43 |
| Lysopc 18:1                                            | 17274808.15 | 21017767.24 | 35338802.34 | 32908880.56 | 19499939.65 |
| Bilirubin                                              | 1012836.202 | 30770790.67 | 291588.0244 | 9674911.041 | 3612106.875 |

| N20         | N21         | N23         | N27         | N28         | N29         | N3          | N30         | N32         |
|-------------|-------------|-------------|-------------|-------------|-------------|-------------|-------------|-------------|
| Healthy     | Healthy     | Healthy     | Healthy     | Healthy     | Healthy     | Healthy     | Healthy     | Healthy     |
| 1854419.242 | 302888.3956 | 860715.0875 | 195078.3274 | 223625.8762 | 211205.0614 | 5198314.138 | 83824.69723 | 86192.52945 |
| 118391724.7 | 73558081.4  | 132198408.5 | 37737681.19 | 62581155.22 | 36278447.34 | 109988510.8 | 70426663.51 | 87741489.42 |
| 1178471.446 | 1048677.226 | 2206177.494 | 1455270.236 | 818034.4285 | 1124652.904 | 528206.9615 | 999609.0521 | 1996457.911 |
| 6584375.645 | 5353462.903 | 6433023.793 | 7884722.049 | 23806404.41 | 32376413.2  | 4482311.405 | 35558577.16 | 5879693.854 |
| 310080.992  | 252859.9539 | 424185.6981 | 318951.4614 | 203047.9477 | 170758.0366 | 246929.2299 | 210707.3807 | 422418.3995 |
| 351686601.3 | 636319149.9 | 604633679.4 | 773137485.3 | 3447960.37  | 24499510.79 | 2767803.073 | 57735817.87 | 618218728.5 |
| 11819544.48 | 6380532.426 | 3392892.556 | 4765858.413 | 3304236.153 | 20397597.91 | 4225482.663 | 2243205.819 | 5482320.75  |
| 4083954.822 | 3201367.922 | 18212653.42 | 5900775.492 | 4365267.18  | 3584750.097 | 8532605.029 | 5061681.76  | 6374878.085 |
| 380262.7563 | 436874.6019 | 401534.2366 | 358784.7654 | 390966.22   | 401965.3365 | 376818.6446 | 352602.24   | 358134.2968 |
| 3333124.533 | 2291129.207 | 2736239.195 | 2937980.364 | 3367623.909 | 2503545.448 | 2950721.135 | 2570256.418 | 4048353.324 |
| 20876819.79 | 11135385.94 | 10917321.46 | 8171974.888 | 11252920.28 | 9595121.22  | 15094190.51 | 16124977.68 | 15058470.33 |
| 481629.2379 | 578169.6359 | 448931.4951 | 470926.3102 | 461103.4382 | 460235.7715 | 1263159.561 | 434127.9781 | 453820.4475 |
| 2620932.947 | 3289553.564 | 2705775.94  | 2098114.265 | 2315934.408 | 24588032.26 | 3692223.071 | 2032307.549 | 1661835.424 |
| 1140944.488 | 921999.4449 | 4156894.402 | 1278153.608 | 973148.2743 | 895982.8055 | 1278321.706 | 864738.1118 | 882993.8456 |
| 528338.7705 | 511875.4908 | 512105.9387 | 1072036.544 | 505830.6695 | 554451.0633 | 1050334.137 | 574196.9923 | 696573.3351 |
| 1987246.523 | 1688731.995 | 2258697.857 | 2376463.977 | 1638581.82  | 1303793.116 | 927880.275  | 1682149.362 | 2686136.354 |
| 174693.0216 | 172406.2481 | 361429.8923 | 432502.8622 | 463276.2368 | 357622.3801 | 188318.5838 | 976714.8168 | 456388.3786 |
| 1483755.595 | 4502226.588 | 24536950.77 | 7140198.51  | 5378859.378 | 4489653.596 | 18906354.4  | 5424740.224 | 5220079.702 |
| 281576.4006 | 355459.0916 | 453990.5926 | 328406.4963 | 288608.7453 | 223118.4114 | 256949.1498 | 299763.5827 | 370238.6105 |
| 14697218.07 | 6671044.943 | 12938820.57 | 10817826.94 | 18115277.59 | 9750057.233 | 12422015.4  | 14429431.46 | 18658904.53 |
| 910273670.5 | 753767901.8 | 171798830.4 | 1816615242  | 221798521.5 | 785104268.2 | 82598018.63 | 71205337.65 | 706111971.8 |
| 29343907.56 | 20161500.68 | 4214201.673 | 37694533.83 | 5021311.687 | 25611678.76 | 4961042.473 | 2775015.265 | 29421506.32 |
| 2566852.941 | 2583867.288 | 2812122.051 | 1709525.48  | 1813049.286 | 959057.0441 | 2666966.676 | 1820118.274 | 2464450.464 |
| 1522014.081 | 859814.6622 | 162435.2111 | 103223.4171 | 1825658.812 | 422212.1641 | 89234.29782 | 1882813.455 | 116233.0557 |
| 19614272    | 30450103.94 | 9025458.839 | 12035199.33 | 15314310.92 | 73064275.89 | 3496690.525 | 3626820.405 | 15538013.28 |
| 416770.3668 | 620208.3669 | 353068.8704 | 334148.3633 | 465587.868  | 316852.5511 | 92220.76263 | 409021.0382 | 359808.5254 |
| 3233639.905 | 3104771.699 | 6931914.488 | 11862176.23 | 4796561.8   | 4094071.49  | 2111025.14  | 3661278.823 | 4952367.36  |
| 1572325.95  | 1084685.534 | 1559204.63  | 975365.8176 | 1591737.513 | 1281807.997 | 918036.7251 | 1287202.709 | 1357621.28  |
| 362129.0948 | 709197.5142 | 698214.3635 | 565792.9309 | 621518.9937 | 7760486.221 | 991074.5283 | 647058.9177 | 727328.2514 |
| 2040839.461 | 3230398.738 | 1924129.774 | 4105925.603 | 2475994.2   | 1281566.184 | 711022.1618 | 611295.0855 | 2694278.538 |
| 9472920.382 | 19243189.71 | 12732587.28 | 6080160.898 | 5742897.25  | 1274578.743 | 11863880.85 | 1160614.067 | 4988575.367 |
| 4579243.176 | 8999145.431 | 4923623.629 | 8012896.969 | 14496269.8  | 15180088.24 | 7936569.954 | 8547288.304 | 9610906.865 |
| 82102149.25 | 85790059.48 | 93375805.01 | 78716827.49 | 94682873    | 97250783.94 | 123409058   | 88068219.44 | 115692533.9 |
| 16172344.38 | 37489510.81 | 75872076.14 | 191919050.5 | 42117757.7  | 27407710.99 | 22039182.79 | 18628838.39 | 4592609.815 |
| 6052042.432 | 5521585.807 | 16718396.93 | 9372997.904 | 9136082.013 | 4112876.234 | 1473269.161 | 5045715.29  | 7931675.596 |
| 28403580.11 | 119325907.3 | 13458067.18 | 29077272.57 | 36477810.22 | 26024368.05 | 23716271.59 | 146324420.7 | 41130087.65 |
| 53520064    | 49268338.81 | 37082756.58 | 43468936.18 | 60222581.78 | 45175446.19 | 56350892.18 | 26120683.47 | 40008490.07 |
| 259150.1188 | 10652767.51 | 11510215.93 | 4990825.785 | 482826.9897 | 2066892.918 | 64401457.66 | 3259977.586 | 1212935.725 |
| P026        | P033        | P035        | P049        | P058        | P065        | P072        | P073        | P074        |
| PCOS-HB     | PCOS-HB     | PCOS-HB     | PCOS-HB     | PCOS-HB     | PCOS-HB     | PCOS-HB     | PCOS-HB     | PCOS-HB     |
| 145185.0401 | 163683.6786 | 117179.3628 | 149623.1595 | 253741.1941 | 319204.9428 | 96444.04938 | 134070.2743 | 143417.583  |
| 199541988.3 | 201571441.6 | 313208218.1 | 270588058.4 | 154932890.2 | 404025930.4 | 89712659.58 | 154629446.8 | 168365033.6 |
| 778645.5658 | 10796185.97 | 7440494.656 | 778057.555  | 2458483.477 | 744204.3476 | 7587131.927 | 6263435.442 | 1854360.511 |
| 2297822.947 | 1593389.826 | 936606.4824 | 8661920.502 | 5474994.291 | 3463270.821 | 1206837.653 | 724103.6214 | 3460052.769 |
| 248859.7174 | 1131173.097 | 1040356.525 | 835913.0019 | 608703.1483 | 537389.9219 | 932742.4702 | 1077086.409 | 481238.7697 |
| 49867374.41 | 70464304.13 | 2057749.914 | 200123497.4 | 2849502434  | 2916214.994 | 596403010.3 | 1339748418  | 2335965643  |
| 1954523.03  | 3877262.091 | 3802850.806 | 1061080.611 | 2570533.995 | 897785.4074 | 1593808.734 | 3560269.151 | 5667213.131 |
| 12055994.17 | 11343133.03 | 36293252.33 | 9919881.156 | 12753626    | 21021906.92 | 6617828.54  | 27414957    | 8738129.46  |
| 425879.7995 | 941308.8563 | 5324609.271 | 577764.9547 | 433207.218  | 569739.9806 | 807012.4393 | 1401675.485 | 380026.064  |
| 3606583.017 | 19256654.25 | 14764758.89 | 117956.1198 | 4148238.516 | 129663.9775 | 11607591.64 | 10772350.51 | 5088183.575 |
| 7000327.201 | 8338254.482 | 10077635.25 | 10484348.18 | 10546795.94 | 52105377.73 | 54986454.85 | 40300101.82 | 128872128.4 |
| 560675.3992 | 846522.1494 | 3113840.525 | 820045.6481 | 543253.2747 | 991279.2689 | 412096.2502 | 485464.4552 | 507090.9497 |
| 3000856.782 | 2957093.938 | 4227119.859 | 2826784.751 | 2949374.493 | 2190101.446 | 1409772.989 | 2037013.958 | 3211950.933 |
| 998676.9388 | 1218200.509 | 26364730.72 | 2553456.942 | 1822099.419 | 28201540.4  | 1628221.346 | 21908278.71 | 1757867.553 |
| 2595473.245 | 1506223.975 | 1227129.487 | 4938775.479 | 1460977.423 | 666141.1433 | 425527.4553 | 566578.1038 | 1910699.357 |



|             |             |             |             |             |             |             |             |             |
|-------------|-------------|-------------|-------------|-------------|-------------|-------------|-------------|-------------|
| 1665954.743 | 11311417.95 | 10059028.63 | 3179799.415 | 4004531.332 | 3218806.035 | 14041001.1  | 13180333.22 | 2990589.306 |
| 529474.291  | 534587.0544 | 686146.0933 | 592316.7839 | 759426.195  | 748364.0871 | 851574.4814 | 462589.4703 | 750084.8829 |
| 9455371.549 | 12575738.4  | 32082702.86 | 18505960.13 | 22625594.56 | 30082701.01 | 12151703.69 | 35216934.28 | 14013786.31 |
| 561563.7948 | 2764543.413 | 1339164.554 | 97026.36034 | 758043.9925 | 100971.8093 | 1395404.088 | 984878.6863 | 555719.1622 |
| 27420929.78 | 76357929.06 | 54088994.52 | 668033.5008 | 19913316.41 | 2958149.81  | 66542962.07 | 61280279.79 | 23114689.06 |
| 242282336.3 | 275784409.2 | 130370496.7 | 97105422.47 | 420662552.8 | 112324791   | 251347481.3 | 563354347   | 583290142.5 |
| 12788496.61 | 10166020.14 | 3817131.562 | 5094365.221 | 11323155.56 | 3316765.326 | 6146614.185 | 19767931.66 | 10918849.55 |
| 3330154.102 | 2974588.841 | 13811821.81 | 5666171.037 | 5578080.875 | 11332564.17 | 4987592.312 | 11491933.72 | 4548218.036 |
| 92333.10776 | 111840.9012 | 97631.47047 | 81556.00385 | 113520.3531 | 92904.25523 | 93847.28513 | 83894.43605 | 70018.86685 |
| 6635976.116 | 9913861.63  | 35223881.7  | 4144250.864 | 6814817.381 | 4573632.548 | 5621227.509 | 17937538.91 | 17472790.93 |
| 622158.6085 | 934960.159  | 1159022.592 | 1178580.339 | 788187.7365 | 644352.9903 | 1043042.552 | 496053.138  | 522445.5742 |
| 3243262.488 | 3020953.524 | 3960607.628 | 2332003.926 | 2829841.54  | 2700339.124 | 3996347.541 | 13419525.21 | 4925072.034 |
| 14765570.83 | 4454564.481 | 6812812.147 | 687338.3955 | 18186279.83 | 1152336.182 | 5967637.646 | 5478126.436 | 611733.8676 |
| 370166.3685 | 495385.5919 | 867714.0226 | 333973.2007 | 234529.9519 | 360316.1902 | 269765.4873 | 431015.3548 | 402679.8529 |
| 683382.4265 | 540927.9246 | 462946.618  | 1319178.995 | 521196.3527 | 293879.9543 | 669849.899  | 1435417.242 | 1217855.701 |
| 17045256.61 | 37874561.04 | 56493907.71 | 25239977.86 | 25528614.23 | 48691777.51 | 34200888.19 | 47887104.2  | 17964878.74 |
| 4956716.003 | 7175700.51  | 2233209.552 | 3641998.722 | 4491853.71  | 2882405.469 | 7463640.785 | 2388845.214 | 3465068.204 |
| 43444600.25 | 57228969.91 | 36870148.41 | 29835919.25 | 28627948.5  | 50710537    | 32794916.46 | 39268875.39 | 43181793.19 |
| 14102523.29 | 16612471.61 | 6521438.685 | 20960654.52 | 8252452.352 | 4450214.71  | 26787884.52 | 38386912.08 | 24703141.69 |
| 4447604.519 | 26851779.59 | 23761148.28 | 13760825.62 | 7577093.703 | 13087795.49 | 32223663.82 | 28913196.18 | 18887458.2  |
| 13570819.34 | 9919243.869 | 13300602.45 | 27450482.22 | 12834601.58 | 18690165.23 | 13566972.81 | 10893432.36 | 12270331.14 |
| 18955248.1  | 24194506.88 | 31087997.82 | 16144687.7  | 19378803.22 | 28022663.53 | 18162988.45 | 24330426.37 | 23891818.53 |
| 7179488.254 | 34787342.11 | 187945041.8 | 42860112.57 | 5559142.084 | 66456988.95 | 849993.2893 | 256796.5448 | 311990.6806 |

---

| N33         | N34         | N35         | N36         | N4          | N5          |
|-------------|-------------|-------------|-------------|-------------|-------------|
| Healthy     | Healthy     | Healthy     | Healthy     | Healthy     | Healthy     |
| 189405.4539 | 105990.9443 | 110330.3217 | 2130512.183 | 241817.5323 | 5018578.501 |
| 158824124.5 | 135283281.9 | 183522289.6 | 170262476   | 118263917.7 | 132807090.7 |
| 1276124.145 | 2440136.916 | 1296902.778 | 9352878.22  | 705714.2165 | 6580858.904 |
| 5022086.597 | 11101419.98 | 17562882.97 | 10521623.7  | 5166973.28  | 3479862.335 |
| 234498.3503 | 516737.414  | 291660.1975 | 1031148.232 | 268006.5193 | 902062.345  |
| 222399132.3 | 771621019.8 | 258402479   | 51106177.82 | 95277640.84 | 1722806.8   |
| 15153303.8  | 4491800.463 | 2840720.631 | 3176121.832 | 12120736.37 | 3080732.142 |
| 9461795.558 | 14025728.22 | 4158662.946 | 10063479.52 | 14836200.85 | 4633566.898 |
| 397423.9819 | 423749.7912 | 410899.1902 | 686014.5825 | 439066.9053 | 371252.5903 |
| 2936350.866 | 2262872.465 | 3412061.302 | 9781356.402 | 4288263.454 | 10176630.73 |
| 7451479.702 | 7908165.667 | 6887912.189 | 11714526.46 | 9920760.573 | 7513765.08  |
| 1759131.052 | 3318562.834 | 6117147.53  | 4187271.896 | 7374524.307 | 448222.7996 |
| 1900755.212 | 2102998.569 | 2361563.803 | 2284087.069 | 19964899.88 | 1069369.077 |
| 1510365.93  | 2823497.583 | 839913.112  | 1330592.752 | 13706353.48 | 757537.3637 |
| 2081598.871 | 642192.2326 | 553499.9424 | 1419828.799 | 1554034.742 | 1514089.702 |
| 1778967.324 | 2483031.486 | 2112318.786 | 10554615.82 | 1967516.064 | 10280881.83 |
| 481888.7725 | 188234.2783 | 214128.1022 | 164852.0943 | 275113.0978 | 312516.8195 |
| 10931378.84 | 13385396.78 | 4679491.696 | 8804136.593 | 27780562.44 | 2659321.483 |
| 281484.135  | 307993.8959 | 313281.2904 | 970810.3269 | 380167.5447 | 992858.2067 |
| 16123419.63 | 10003279.85 | 11947538.79 | 39669874.65 | 9990317.677 | 25398848.43 |
| 274517032.8 | 699740187   | 576593205.2 | 515420466.5 | 371574267.4 | 505111135   |
| 15612797.72 | 12945726.73 | 14932054.27 | 10808257.42 | 24875237.59 | 12542598.78 |
| 2891280.022 | 2009038.687 | 2158158.599 | 2182134.77  | 7750784.764 | 2375551.009 |
| 166346.2127 | 165273.7564 | 208622.8482 | 2717847.625 | 235553.2786 | 113580.8891 |
| 31819289.82 | 14363340.02 | 7174489.252 | 8747064.498 | 65297192.04 | 17652264.96 |
| 446605.1131 | 131075.498  | 345771.2932 | 460485.5531 | 329858.5872 | 381800.1056 |
| 5888415.12  | 19621380.05 | 4485409.887 | 7604403.667 | 5036047.05  | 17219431.14 |
| 1371398.022 | 1177418.258 | 1759167.62  | 3429928.951 | 5064458.236 | 3381676.249 |
| 849333.708  | 471164.6844 | 563174.7382 | 509008.981  | 8292226.663 | 841313.1811 |
| 1781292.808 | 1734040.51  | 1959886.395 | 2560733.518 | 1263540.076 | 2774398.716 |
| 7063442.586 | 12520838.13 | 7333259.155 | 7909321.026 | 36508597.74 | 14719227.78 |
| 8609485.103 | 7801853.642 | 11713809.79 | 9291304.863 | 4106900.726 | 11959806.42 |
| 105645112.8 | 53264746.97 | 64416621.93 | 60040958.47 | 82824751.82 | 99022647.6  |
| 15413517.03 | 7243209.578 | 48382093.79 | 40928066.36 | 8230769     | 181932953.2 |
| 3929102.063 | 4907950.651 | 10277692.85 | 9995378.364 | 4410277.521 | 8097481.579 |
| 48255135.04 | 140650494   | 11503826.44 | 22252835.44 | 23212193.53 | 29594792.9  |
| 42708165.05 | 32181941.55 | 34255780.82 | 36457384.93 | 43986458.4  | 44103693.56 |
| 137550876.9 | 155238512.7 | 240019496.1 | 184290308.1 | 371318424.7 | 316092.6184 |
| P077        | P080        | P096        | P101        | P103        | P104        |
| PCOS-HB     | PCOS-HB     | PCOS-HB     | PCOS-HB     | PCOS-HB     | PCOS-HB     |
| 241945.7341 | 109174.2657 | 136201.3737 | 94966.88501 | 118756.9058 | 119522.675  |
| 220554874.1 | 98865552.48 | 313387640.9 | 258152912.1 | 139068506.5 | 200465389.2 |
| 651954.5448 | 11997692.75 | 7624449.38  | 782924.9783 | 968526.5342 | 806857.7103 |
| 2935280.947 | 12757510.73 | 4790335.006 | 1775969.34  | 4577405.177 | 4203774.048 |
| 1022911.096 | 1606165.893 | 1027738.515 | 292490.946  | 321177.7387 | 456867.0225 |
| 2013446513  | 2899678.775 | 1598669732  | 1697237911  | 168097571.7 | 2778772.277 |
| 1149193.1   | 1876831.778 | 2791466.494 | 1891475.889 | 2693071.09  | 1998040.284 |
| 16259512.03 | 7006636.557 | 23980049.88 | 7568503.09  | 7969332.838 | 9165546.648 |
| 538901.5147 | 1757002.076 | 2382125.339 | 382670.9048 | 344164.974  | 433528.3017 |
| 114268.7963 | 15056799.85 | 7482369.663 | 2948363.776 | 3317407.603 | 3466012.85  |
| 5343031.897 | 13766258.11 | 53892761.14 | 103530225.2 | 92678591.95 | 11258120.67 |
| 636131.125  | 475771.4192 | 445785.8249 | 482412.6147 | 506858.3139 | 565112.8891 |
| 3114002.083 | 2803950.496 | 1868516.667 | 2049159.988 | 2392975.678 | 1848617.527 |
| 2553204.504 | 1910494.652 | 7851704.979 | 1552487.844 | 1340935.384 | 1483110.336 |
| 4833881.218 | 2096306.752 | 1233387.669 | 1354950.548 | 1471347.515 | 1718094.889 |

|             |             |             |             |             |             |
|-------------|-------------|-------------|-------------|-------------|-------------|
| 3723618.052 | 13531106.32 | 8878667.961 | 1548344.249 | 1766308.643 | 1804049.41  |
| 827036.0548 | 882908.2519 | 807605.3206 | 920325.8138 | 1224037.109 | 335075.506  |
| 12666111.1  | 11459209.34 | 23266371.94 | 18067884.66 | 10356687.38 | 12435719.07 |
| 89610.6974  | 1896381.716 | 780589.464  | 398997.1725 | 645980.5241 | 548950.118  |
| 674424.9643 | 82322240.87 | 31404992.44 | 16414372.91 | 11448099.78 | 10865620    |
| 481262918.1 | 84859534.36 | 432703861.9 | 564004213.4 | 488268442.8 | 51550580.2  |
| 7016058.965 | 2912032.201 | 13114319.01 | 10374340.33 | 9885057.737 | 2092047.155 |
| 6497674.187 | 2890258.02  | 10315900.9  | 5991171.128 | 2260817.067 | 2735144.067 |
| 784621.8736 | 2366364.349 | 80941.01953 | 75875.70452 | 82119.62002 | 139671.455  |
| 14016183.39 | 7364493.199 | 7492941.643 | 8469628.602 | 4887661.235 | 4131650.842 |
| 480697.8992 | 525915.3167 | 653024.1813 | 809214.7561 | 904026.5633 | 1024674.725 |
| 4983041.487 | 3359579.135 | 2497544.933 | 4288435.711 | 3140066.954 | 2853623.308 |
| 1103518.726 | 7502593.065 | 3350992.068 | 1293149.934 | 1433750.312 | 1327121.829 |
| 437777.2622 | 363711.962  | 371430.7243 | 373587.9678 | 302666.2702 | 235522.9482 |
| 1151485.682 | 3981967.329 | 930899.1888 | 986137.1119 | 812848.6521 | 772903.1116 |
| 27264684.19 | 14199878.24 | 38388402.18 | 7715964.838 | 10850107.53 | 7024494.622 |
| 8465154.507 | 6308922.098 | 2895475.86  | 5880137.138 | 3332161.137 | 5001916     |
| 31613179.38 | 66744058.61 | 26882047.3  | 23658233.39 | 37639066.76 | 36594437.41 |
| 5154481.842 | 21367548.31 | 13836901.94 | 5688516.397 | 48536900.62 | 14555190.62 |
| 21812348.97 | 16837148.87 | 18359945.97 | 29999718.91 | 20952502.54 | 20788123.39 |
| 14960362.54 | 13435644.86 | 7467547.388 | 13207230.03 | 11369658.15 | 10639834.19 |
| 21789747.75 | 28401272.97 | 19311795.6  | 18600971.03 | 19786478.87 | 21944628.2  |
| 705567.2454 | 672366.4459 | 276198.8315 | 10795341.5  | 606626.7985 | 14153225.81 |

---

**Supplement Table 11** Distinguished metabolites between healthy and PCOS-LB

| sample                                                               | N10         | N11         | N12        | N16         | N18        | N20         | N21         | N23         |
|----------------------------------------------------------------------|-------------|-------------|------------|-------------|------------|-------------|-------------|-------------|
| Group                                                                | Healthy     | Healthy     | Healthy    | Healthy     | Healthy    | Healthy     | Healthy     | Healthy     |
| 3-Acetoxyurs-12-en-23-oic acid                                       | 4796496.061 | 2986405.213 | 4144935.88 | 4362319.544 | 4519910.04 | 4670121.777 | 5760503.744 | 7493626.124 |
| PC (22:6e/19:1)                                                      | 829225.4984 | 532828.0568 | 513319.589 | 506496.8121 | 468624.275 | 528338.7705 | 511875.4908 | 512105.9387 |
| Estrone sulfate                                                      | 396844.0695 | 416290.6623 | 164943.055 | 677269.6573 | 279903.429 | 416770.3668 | 620208.3669 | 353068.8704 |
| PC (16:1/17:2)                                                       | 88729.84834 | 83944.49213 | 74718.7297 | 131930.8435 | 75174.279  | 184061.4908 | 464732.0508 | 76225.2654  |
| Lysopc 15:0                                                          | 24855668.49 | 6706526.82  | 10074304.1 | 21328516.72 | 19845023.3 | 20876819.79 | 11135385.94 | 10917321.46 |
| 4-(octyloxy)benzoic acid                                             | 1718908.272 | 1338970.069 | 1177577.42 | 1230225.833 | 1549140.32 | 1572325.95  | 1084685.534 | 1559204.63  |
| Agnuside                                                             | 820941.9788 | 93389.85899 | 104261.356 | 112958.0891 | 223488.941 | 1522014.081 | 859814.6622 | 162435.2111 |
| 4-Chlorophenol                                                       | 298058.9076 | 166709.3044 | 253785.155 | 283725.4933 | 224640.781 | 258416.9134 | 237470.4537 | 347843.0464 |
| 2-[1-(4-isobutylphenyl)ethyl]-5-(3-nitrophenyl)-1,3,4-oxadiazole     | 7222751.363 | 3477844.914 | 4987251.65 | 5142830.121 | 1870244.57 | 6584375.645 | 5353462.903 | 6433023.793 |
| 2-Amino-1,3,4-octadecanetriol                                        | 22220249.21 | 4293119.806 | 3094838.83 | 5455628.774 | 4354035.78 | 39225120.11 | 26255317.22 | 4220782.519 |
| Hesperetin                                                           | 225928.2241 | 554378.495  | 223890.822 | 214195.4681 | 211405.938 | 212026.5989 | 222558.6918 | 202300.9594 |
| LPC 22:1                                                             | 994971.5795 | 758306.436  | 4864686.54 | 475062.8745 | 2067237.01 | 362129.0948 | 709197.5142 | 698214.3635 |
| D-(+)-Maltose                                                        | 2350282.174 | 719503.8699 | 1263431.86 | 1917530.945 | 1752447.68 | 2361446.298 | 7150545.794 | 2007046.605 |
| SM (d21:1/21:0)                                                      | 92488.37611 | 77466.74649 | 72458.1407 | 71081.37789 | 73255.2803 | 584877.5192 | 742991.921  | 746369.5973 |
| (2E)-4-Hydroxy-3,7-dimethyl-2,6-octadien-1-yl beta-D-glucopyranoside | 66244.8717  | 98055.64854 | 939859.778 | 65075.72836 | 60449.9146 | 45374.11204 | 88160.65512 | 48049.5132  |
| sample                                                               | P001        | P014        | P022       | P031        | P032       | P043        | P034        | P037        |
| Group                                                                | PCOS-LB     | PCOS-LB     | PCOS-LB    | PCOS-LB     | PCOS-LB    | PCOS-LB     | PCOS-LB     | PCOS-LB     |
| 3-Acetoxyurs-12-en-23-oic acid                                       | 9413576.217 | 8098844.515 | 7701523.29 | 13582924.65 | 13251303.3 | 15002270.17 | 11566707.79 | 12975653.26 |
| PC (22:6e/19:1)                                                      | 1394797.924 | 1085971.542 | 1698408.77 | 2894732.811 | 1822557.23 | 2113994.264 | 1767440.41  | 2608819.879 |
| Estrone sulfate                                                      | 893132.2457 | 873684.3048 | 1296523.98 | 1735516.727 | 865450.762 | 488293.2813 | 1223837.045 | 856885.2563 |
| PC (16:1/17:2)                                                       | 268400.0928 | 370121.1847 | 381966.572 | 177153.3653 | 766584.188 | 346096.8279 | 414346.5004 | 376308.3996 |
| Lysopc 15:0                                                          | 73285567.13 | 8428302.389 | 42811449.1 | 32441542.56 | 1832940.67 | 47703939.56 | 44414347.71 | 49761934.28 |
| 4-(octyloxy)benzoic acid                                             | 1016539.463 | 6283147.922 | 8953798.22 | 11007201.4  | 1020103.22 | 17029537    | 22261399.32 | 4539515.655 |
| Agnuside                                                             | 136797.3694 | 88343.77713 | 108548.033 | 94036.50431 | 94439.1573 | 101992.0709 | 115886.8798 | 117485.5182 |
| 4-Chlorophenol                                                       | 2281310.033 | 1329382.871 | 743997.245 | 264556.0725 | 1295869.72 | 316143.5169 | 721166.2205 | 5015729.588 |
| 2-[1-(4-isobutylphenyl)ethyl]-5-(3-nitrophenyl)-1,3,4-oxadiazole     | 3391214.991 | 2456189.812 | 1402982.27 | 5987656.484 | 9078307.14 | 2026559.477 | 3699776.692 | 2639120.169 |
| 2-Amino-1,3,4-octadecanetriol                                        | 2844833.265 | 2320610.102 | 2814513.94 | 2932122.964 | 2663903.31 | 2276617.525 | 4248340.445 | 2708126.824 |
| Hesperetin                                                           | 199265.2116 | 270528.8407 | 328888.495 | 340828.9884 | 1174542.62 | 1494893.265 | 2439334.574 | 340380.986  |
| LPC 22:1                                                             | 486641.2055 | 281630.92   | 996642.137 | 620314.2703 | 427074.403 | 823542.3529 | 563889.8887 | 468419.6535 |
| D-(+)-Maltose                                                        | 1731930.967 | 1542884.235 | 1258733.39 | 785139.7905 | 1220326.57 | 416566.9029 | 1141208.866 | 947841.6809 |
| SM (d21:1/21:0)                                                      | 1414477.275 | 1266167.252 | 879471.784 | 1617902.848 | 919988.477 | 1559328.074 | 1391369.67  | 2090464.304 |
| (2E)-4-Hydroxy-3,7-dimethyl-2,6-octadien-1-yl beta-D-glucopyranoside | 52653.47302 | 50787.95004 | 144595.053 | 55687.26338 | 143058.079 | 59056.48619 | 80765.41049 | 65429.87709 |

| N27         | N28         | N29         | N3          | N30         | N32         | N33         | N34         | N35        | N36        | N4         | N5         |
|-------------|-------------|-------------|-------------|-------------|-------------|-------------|-------------|------------|------------|------------|------------|
| Healthy     | Healthy     | Healthy     | Healthy     | Healthy     | Healthy     | Healthy     | Healthy     | Healthy    | Healthy    | Healthy    | Healthy    |
| 4909183.676 | 7605574.636 | 5864579.657 | 5252623.743 | 5911201.972 | 4723029.067 | 10280568.13 | 7140716.72  | 5881738.47 | 416455.782 | 8394210.95 | 7283181.35 |
| 1072036.544 | 505830.6695 | 554451.0633 | 1050334.137 | 574196.9923 | 696573.3351 | 2081598.871 | 642192.2326 | 553499.942 | 1419828.8  | 1554034.74 | 1514089.7  |
| 334148.3633 | 465587.868  | 316852.5511 | 92220.76263 | 409021.0382 | 359808.5254 | 446605.1131 | 131075.498  | 345771.293 | 460485.553 | 329858.587 | 381800.106 |
| 293400.8217 | 86266.38333 | 122891.7581 | 84667.62859 | 247959.9602 | 76753.8167  | 350934.5845 | 281647.973  | 200919.153 | 505302.678 | 194329.895 | 260853.089 |
| 8171974.888 | 11252920.28 | 9595121.22  | 15094190.51 | 16124977.68 | 15058470.33 | 7451479.702 | 7908165.667 | 6887912.19 | 11714526.5 | 9920760.57 | 7513765.08 |
| 975365.8176 | 1591737.513 | 1281807.997 | 918036.7251 | 1287202.709 | 1357621.28  | 1371398.022 | 1177418.258 | 1759167.62 | 3429928.95 | 5064458.24 | 3381676.25 |
| 103223.4171 | 1825658.812 | 422212.1641 | 89234.29782 | 1882813.455 | 116233.0557 | 166346.2127 | 165273.7564 | 208622.848 | 2717847.63 | 235553.279 | 113580.889 |
| 322043.7978 | 286377.4041 | 146534.6209 | 345585.4559 | 137878.0618 | 253794.0347 | 247792.518  | 225518.1882 | 236125.443 | 316886.21  | 392332.924 | 249336.391 |
| 7884722.049 | 23806404.41 | 32376413.2  | 4482311.405 | 35558577.16 | 5879693.854 | 5022086.597 | 11101419.98 | 17562883   | 10521623.7 | 5166973.28 | 3479862.34 |
| 5596573.394 | 65897243.26 | 29743115.58 | 5366035.811 | 104210819.8 | 5012890.509 | 4674439.172 | 5889464.481 | 5644006.23 | 210432370  | 6136561.24 | 4067527.22 |
| 214655.8174 | 199422.5364 | 214769.3644 | 198494.683  | 214781.8693 | 207312.9781 | 231029.437  | 221816.5414 | 208141.369 | 280442.494 | 403609.754 | 265102.775 |
| 565792.9309 | 621518.9937 | 7760486.221 | 991074.5283 | 647058.9177 | 727328.2514 | 849333.708  | 471164.6844 | 563174.738 | 509008.981 | 8292226.66 | 841313.181 |
| 2095856.063 | 1885051.428 | 10526584.42 | 1564778.171 | 15172734.86 | 1829494.363 | 1065775.829 | 1525115.766 | 1056803.3  | 1371158.76 | 1049293.66 | 1666017.33 |
| 858266.2232 | 1384225.023 | 1035282.465 | 983621.2668 | 986550.5698 | 720192.7605 | 1179853.633 | 1266002.015 | 1279151.63 | 903410.511 | 986030.655 | 1498498.68 |
| 136967.5032 | 65017.21954 | 1829015.003 | 54580.7065  | 37010.73812 | 75743.92148 | 107037.0078 | 57153.42183 | 52714.4478 | 96427.8205 | 1910589.58 | 146153.496 |
| P047        | P051        | P053        | P057        | P061        | P062        | P085        | P084        | P086       | P089       | P094       | P092       |
| PCOS-LB     | PCOS-LB     | PCOS-LB     | PCOS-LB     | PCOS-LB     | PCOS-LB     | PCOS-LB     | PCOS-LB     | PCOS-LB    | PCOS-LB    | PCOS-LB    | PCOS-LB    |
| 13053138.77 | 13714573.83 | 13749370.14 | 15975735.44 | 11379907.31 | 10671048.67 | 14936716.05 | 11821097.46 | 19133997.2 | 11259346   | 11213320.7 | 8395483.6  |
| 1765079.684 | 3386382.285 | 5058565.286 | 2237671.576 | 2900087.518 | 1579863.27  | 1332394.164 | 2725918.33  | 1807115.24 | 1948549.76 | 2011996.61 | 2828821.75 |
| 643656.7998 | 823453.4658 | 743625.9967 | 985964.825  | 773901.7068 | 696216.4377 | 978295.6314 | 568596.1459 | 636826.119 | 1093347.1  | 1638706.72 | 263798.706 |
| 377964.3863 | 696258.4162 | 733510.5074 | 591831.6557 | 452650.124  | 465209.7896 | 250464.6338 | 451603.7013 | 229101.01  | 451874.031 | 896192.699 | 378858.03  |
| 50552166.89 | 11046642.45 | 17656143.79 | 7737220.271 | 13379402.08 | 10926875.71 | 74523317.33 | 68330717.4  | 9837908.48 | 59962659.4 | 62880937.4 | 5719701.66 |
| 7740184.231 | 5826726.311 | 817798.9525 | 17575091.35 | 889852.6252 | 1149500.928 | 3018868.208 | 4494179.368 | 5278396.78 | 1107728.56 | 1649592.56 | 1905931.37 |
| 76658.92892 | 158191.885  | 128244.0308 | 80416.92339 | 90426.90862 | 110521.1916 | 107346.4255 | 142808.232  | 98282.8913 | 72109.3725 | 89150.1122 | 149718.451 |
| 246419.0751 | 8946636.772 | 370225.3271 | 255718.7634 | 780853.3772 | 1570002.846 | 6558154.638 | 551949.2361 | 339929.246 | 150507.402 | 268354.165 | 951739.065 |
| 1738069.903 | 8542727.036 | 3507106.198 | 1105144.167 | 3382906.093 | 2206282.019 | 2749590.113 | 5146361.704 | 5806307.5  | 7184429.12 | 10173423.8 | 7244176.04 |
| 2077432.917 | 4772381.988 | 4563006.859 | 2747500.98  | 3345523.547 | 2656441.81  | 6724470.513 | 3888988.322 | 2838099.02 | 4323546.71 | 3708947.41 | 4484366.64 |
| 9061317.763 | 389476.3233 | 298555.616  | 253055.459  | 5252247.931 | 392183.1912 | 267781.2241 | 237649.4129 | 2971007.56 | 219545.661 | 232275.478 | 202867.808 |
| 383529.5872 | 604947.554  | 710192.5154 | 445820.1439 | 1259885.379 | 680940.5576 | 530707.7454 | 751344.075  | 527294.996 | 464462.383 | 457344.471 | 269028.114 |
| 939068.4791 | 1215996.567 | 1453593.13  | 1447967.588 | 2132622.099 | 2690092.415 | 1888430.285 | 1000946.579 | 1686982.07 | 1283912.84 | 2476982.03 | 1389097.54 |
| 1823521.982 | 19881780.9  | 1453218.111 | 952190.7142 | 1170331.82  | 2629425.773 | 2334797.274 | 1496054.495 | 1442676.46 | 1429881.8  | 1647107.2  | 853223.124 |
| 44410.98223 | 48532.92757 | 65334.75722 | 49298.13292 | 121684.1233 | 62897.47937 | 132159.238  | 65338.65316 | 60305.2271 | 57649.4267 | 87115.4774 | 65221.5014 |
